# Supplementary material for: A novel panel of clinically relevant miRNAs signature accurately differentiates oral cancer from normal mucosa
Source: Front Oncol. 2022 Dec 1;12:1072579. doi: 10.3389/fonc.2022.1072579 (PMC9753689; doi:10.3389/fonc.2022.1072579)
Supplement: Supplementary Table 1 — List of 22 protein-coding genes used for the selection of 10 miRNA panel. [file Table_1.xlsx]

## Sheet: mirwalk analysis
gene target	# miRNAs binding all genes	miRNAs
CARHSP1	10	hsa-miR-133b;hsa-miR-146b-5p;hsa-miR-155-5p;hsa-miR-182-5p;hsa-miR-193b-5p;hsa-miR-21-5p;hsa-miR-34b-3p;hsa-miR-429;hsa-miR-518c-3p;hsa-miR-93-5p
CDYL2	10	hsa-miR-133b;hsa-miR-146b-5p;hsa-miR-155-5p;hsa-miR-182-5p;hsa-miR-193b-5p;hsa-miR-21-5p;hsa-miR-34b-3p;hsa-miR-429;hsa-miR-518c-3p;hsa-miR-93-5p
CEP43	10	hsa-miR-133b;hsa-miR-146b-5p;hsa-miR-155-5p;hsa-miR-182-5p;hsa-miR-193b-5p;hsa-miR-21-5p;hsa-miR-34b-3p;hsa-miR-429;hsa-miR-518c-3p;hsa-miR-93-5p
DCTN5	10	hsa-miR-133b;hsa-miR-146b-5p;hsa-miR-155-5p;hsa-miR-182-5p;hsa-miR-193b-5p;hsa-miR-21-5p;hsa-miR-34b-3p;hsa-miR-429;hsa-miR-518c-3p;hsa-miR-93-5p
FBXO25	10	hsa-miR-133b;hsa-miR-146b-5p;hsa-miR-155-5p;hsa-miR-182-5p;hsa-miR-193b-5p;hsa-miR-21-5p;hsa-miR-34b-3p;hsa-miR-429;hsa-miR-518c-3p;hsa-miR-93-5p
FBXO32	10	hsa-miR-133b;hsa-miR-146b-5p;hsa-miR-155-5p;hsa-miR-182-5p;hsa-miR-193b-5p;hsa-miR-21-5p;hsa-miR-34b-3p;hsa-miR-429;hsa-miR-518c-3p;hsa-miR-93-5p
FLRT2	10	hsa-miR-133b;hsa-miR-146b-5p;hsa-miR-155-5p;hsa-miR-182-5p;hsa-miR-193b-5p;hsa-miR-21-5p;hsa-miR-34b-3p;hsa-miR-429;hsa-miR-518c-3p;hsa-miR-93-5p
GAN	10	hsa-miR-133b;hsa-miR-146b-5p;hsa-miR-155-5p;hsa-miR-182-5p;hsa-miR-193b-5p;hsa-miR-21-5p;hsa-miR-34b-3p;hsa-miR-429;hsa-miR-518c-3p;hsa-miR-93-5p
GRIN2A	10	hsa-miR-133b;hsa-miR-146b-5p;hsa-miR-155-5p;hsa-miR-182-5p;hsa-miR-193b-5p;hsa-miR-21-5p;hsa-miR-34b-3p;hsa-miR-429;hsa-miR-518c-3p;hsa-miR-93-5p
HEBP2	10	hsa-miR-133b;hsa-miR-146b-5p;hsa-miR-155-5p;hsa-miR-182-5p;hsa-miR-193b-5p;hsa-miR-21-5p;hsa-miR-34b-3p;hsa-miR-429;hsa-miR-518c-3p;hsa-miR-93-5p
ITPK1	10	hsa-miR-133b;hsa-miR-146b-5p;hsa-miR-155-5p;hsa-miR-182-5p;hsa-miR-193b-5p;hsa-miR-21-5p;hsa-miR-34b-3p;hsa-miR-429;hsa-miR-518c-3p;hsa-miR-93-5p
KCNK10	10	hsa-miR-133b;hsa-miR-146b-5p;hsa-miR-155-5p;hsa-miR-182-5p;hsa-miR-193b-5p;hsa-miR-21-5p;hsa-miR-34b-3p;hsa-miR-429;hsa-miR-518c-3p;hsa-miR-93-5p
MAPKAPK5	10	hsa-miR-133b;hsa-miR-146b-5p;hsa-miR-155-5p;hsa-miR-182-5p;hsa-miR-193b-5p;hsa-miR-21-5p;hsa-miR-34b-3p;hsa-miR-429;hsa-miR-518c-3p;hsa-miR-93-5p
MBOAT2	10	hsa-miR-133b;hsa-miR-146b-5p;hsa-miR-155-5p;hsa-miR-182-5p;hsa-miR-193b-5p;hsa-miR-21-5p;hsa-miR-34b-3p;hsa-miR-429;hsa-miR-518c-3p;hsa-miR-93-5p
MYLK3	10	hsa-miR-133b;hsa-miR-146b-5p;hsa-miR-155-5p;hsa-miR-182-5p;hsa-miR-193b-5p;hsa-miR-21-5p;hsa-miR-34b-3p;hsa-miR-429;hsa-miR-518c-3p;hsa-miR-93-5p
NME9	10	hsa-miR-133b;hsa-miR-146b-5p;hsa-miR-155-5p;hsa-miR-182-5p;hsa-miR-193b-5p;hsa-miR-21-5p;hsa-miR-34b-3p;hsa-miR-429;hsa-miR-518c-3p;hsa-miR-93-5p
NOPCHAP1	10	hsa-miR-133b;hsa-miR-146b-5p;hsa-miR-155-5p;hsa-miR-182-5p;hsa-miR-193b-5p;hsa-miR-21-5p;hsa-miR-34b-3p;hsa-miR-429;hsa-miR-518c-3p;hsa-miR-93-5p
NTRK3	10	hsa-miR-133b;hsa-miR-146b-5p;hsa-miR-155-5p;hsa-miR-182-5p;hsa-miR-193b-5p;hsa-miR-21-5p;hsa-miR-34b-3p;hsa-miR-429;hsa-miR-518c-3p;hsa-miR-93-5p
OPN3	10	hsa-miR-133b;hsa-miR-146b-5p;hsa-miR-155-5p;hsa-miR-182-5p;hsa-miR-193b-5p;hsa-miR-21-5p;hsa-miR-34b-3p;hsa-miR-429;hsa-miR-518c-3p;hsa-miR-93-5p
SLC8A1	10	hsa-miR-133b;hsa-miR-146b-5p;hsa-miR-155-5p;hsa-miR-182-5p;hsa-miR-193b-5p;hsa-miR-21-5p;hsa-miR-34b-3p;hsa-miR-429;hsa-miR-518c-3p;hsa-miR-93-5p
SYNCRIP	10	hsa-miR-133b;hsa-miR-146b-5p;hsa-miR-155-5p;hsa-miR-182-5p;hsa-miR-193b-5p;hsa-miR-21-5p;hsa-miR-34b-3p;hsa-miR-429;hsa-miR-518c-3p;hsa-miR-93-5p
TFCP2L1	10	hsa-miR-133b;hsa-miR-146b-5p;hsa-miR-155-5p;hsa-miR-182-5p;hsa-miR-193b-5p;hsa-miR-21-5p;hsa-miR-34b-3p;hsa-miR-429;hsa-miR-518c-3p;hsa-miR-93-5p
