# Supplementary material for: A novel panel of clinically relevant miRNAs signature accurately differentiates oral cancer from normal mucosa
Source: Front Oncol. 2022 Dec 1;12:1072579. doi: 10.3389/fonc.2022.1072579 (PMC9753689; doi:10.3389/fonc.2022.1072579)
Supplement: Supplementary Table 2 — The list of 10 miRNAs panel assays ID and catalog number. [file Table_2.xls]

## Sheet: Sheet1
miRNA	Cat #	ID	Name			10
miR-34b - 3p	218300	MS00008190	Hs_miR-34b_2 miScript Primer Assay
miR21-5p	218300	MS00009079	Hs_miR-21_2 miScript Primer Assay
miR93-5p	218300	MS00003346	Hs_miR-93_1 miScript Primer Assay
miR133b	218300	MS00031430	Hs_miR-133b_2 miScript Primer Assay
miR146b-5b	218300	MS00003542	Hs_miR-146b_1 miScript Primer Assay
miR155-5p	218300	MS00031486	Hs_miR-155_2 miScript Primer Assay
miR182-5p	218300	MS00008855	Hs_miR-182_2 miScript Primer Assay
miR193b-5p	218300	MS00008939	Hs_miR-193b*_1 miScript Primer Assay
miR-429	218300	MS00004193	Hs_miR-429_1 miScript Primer Assay
miR518c	218300	MS00004473	Hs_miR-518c_1 miScript Primer Assay
