# Supplementary material for: A novel panel of clinically relevant miRNAs signature accurately differentiates oral cancer from normal mucosa
Source: Front Oncol. 2022 Dec 1;12:1072579. doi: 10.3389/fonc.2022.1072579 (PMC9753689; doi:10.3389/fonc.2022.1072579)
Supplement: Supplementary Table 3 — RT-qPCR expression values of miR-21-5p, miR-34b-3p, miR-93-5p, miR-133b, miR-146b-5p, miR-155-5p, miR-182-5p, miR-193b-5p, miR-429 and miR-518c-3p of 34 patients from UHSG cohort. [file Table_3.xlsx]

## Sheet: Ct data 
										Ct
			miR-21		miR-34b		miR-93		miR-133b		miR-146b		miR-155		miR-182		miR-193b		miR-429		miR-518c		RNU6		SNORD72
		1N	15.59	15.65	23.95	23.95	20.04	20.06	25.63	26.01	21.84	21.5	23.39	23.38	22.98	23	22.87	22.64	23.7	23.46	29.78	30.14	14.41	14.74	20.43	20.79
		3N	16.32	16.32	28.93	29.73	23.61	23.71	31.11	32.3	24.14	23.66	24.62	25.23	25.28	26.52	26.32	25.96	29.26	29.65	33.83	35.06	17.26	17.68	22.55	24.78
		4N	19.29	19.09	26.78	27.03	21.96	22.03	28.53	28.55	23.66	23.56	24.94	25.04	23.71	23.58	25.71	24.5	23.27	23.34	32.2	32.1	16.56	16.57	21.48	21.2
		5N	16.94	16.92	28.37	28.62	22.37	22.48	29.92	29.38	23.53	23.5	24.94	24.93	24.48	24.5	24.73	24.73	25.18	25.16	34.26	34.52	16.34	16.57	22.46	22.71
		6N	16.5	16.45	26.23	26.33	21.28	20.91	27.25	27.23	23.01	23.35	24.97	24.78	23.38	23.31	24.46	24.45	24.24	24.11	32.59	31.9	15.5	15.8	19.76	19.59
		7N	16.54	16.43	23.26	23.2	21.63	21.59	25.15	25.45	24.16	24.21	23.51	23.4	23.51	23.51	22.17	22.45	25.63	25.74	29.42	29.24	16.43	16.41	22.68	22.71
		8N	18.7	18.62	25.22	25.65	23.17	22.91	27.89	27.88	24.82	24.66	24.64	24.57	24.97	25.16	23.8	24.26	27.18	27.82	32.32	32.22	17.75	17.75	22.22	22.45
		9N	16.6	16.71	26	25.26	22.02	22.16	27.51	28.24	23.52	23.49	24.98	24.98	23.9	23.97	24	23.92	24.95	25.09	32.37	33.34	15.12	15.06	20.29	20.32
		10N	17.08	17.07	27.82	27.95	22.92	22.95	29.53	29.72	23.85	23.78	24.66	24.7	25.07	25.14	25.93	25.91	26.14	26.31	34.19	35.96	16.76	16.75	21.9	21.81
		11N	17.49	17.35	27.09	27.09	21.94	21.96	24.54	24.67	24.14	24.27	25.94	26.01	24.58	24.56	26.05	26.04	25.12	25.19	34.03	36.05	17.85	17.89	21.87	23.32
		12N	17	17.06	26.81	27.06	21.99	22.02	22.05	22.16	22.71	22.61	25.49	25.58	24.28	24.24	25.22	25.24	23.73	23.76	34.63	34.48	17.05	16.97	21.34	21.25
		13N	17.75	17.88	28.03	27.84	22.6	22.56	31.42	30.92	24.3	24.37	25.81	25.86	24.48	24.72	26.13	26.26	26.17	26.25	35.69	34.33	17.42	17.79	24.26	23.84
		14N	19.22	19.13	28.71	28.96	23.5	23.42	30.82	31.31	24.26	24.18	25.74	25.67	25.36	25.37	26.24	26.21	28.73	28.43	36.93	38.37	20.28	20.86	25.6	25.49
		15N	20.64	19.77	29.6	29.44	23.87	23.9	31.73	31.59	25.18	25	25.32	25.28	26.15	26.02	26.52	26.57	29.31	29.06	35.33	37.88	20.53	20.69	28.22	26.28
		16N	17.13	17.13	26.26	26.29	21.19	21.24	28.94	29.72	23.48	23.48	25.44	25.35	23.61	23.69	25.29	25.59	22.69	22.68	33.43	34.39	17.04	17.17	21.2	21.25
		17N	20.34	20.62	28.03	28.07	22.66	22.67	30.1	30.05	24.44	24.52	25.13	25.05	24.78	24.61	25.71	25.87	26.94	27.03	37.82	35.93	18.17	18.27	24.33	24.46
		18N	21.04	20.98	29.11	29.36	23.41	23.35	30.13	29.84	25.65	25.57	25.6	25.59	25.9	26	26.13	26.23	28.3	28.27	37.29	35.87	22.93	20.22	26.4	26.4
		19N	16.84	16.69	26.27	26.25	21.5	21.5	23.26	23.21	23.52	23.52	25.76	25.74	23.9	23.85	25.62	25.65	23.28	23.39	34	33.36	16.5	16.57	20.92	20.94
		20N	22.19	22.19	29.42	29.62	24.03	23.94	25.44	25.38	25.41	25.38	24.02	24.02	27.08	27.13	26.78	26.77	29.8	30.03	36.28	34.07	22.3	22.62	26.11	26.05
		21N	17.33	17.3	26.54	26.28	21.4	21.51	24.48	24.43	22.33	22.47	25.43	25.42	23.74	23.82	25.84	25.86	23.81	23.76	33.54	33.6	17.33	17.61	21.37	21.27
		22N	19.09	19.27	29.23	29.47	23.4	23.45	27.57	27.43	24.92	25.01	26.23	26.26	24.84	24.76	26.25	26.44	26.61	26.51	40	36.4	18.65	18.21	23.95	24.01
		23N	17	17.06	26.81	27.06	21.99	22.02	22.05	22.16	22.71	22.61	25.49	25.58	24.28	24.24	25.22	25.24	23.73	23.76	34.63	34.48	17.05	16.97	21.34	21.25
		24N	18.38	18.37	28.51	28.61	22.95	23.03	29.39	30.39	23.85	23.82	25.69	25.68	24.31	24.38	26.18	26.26	25.38	25.56	36.71	34.2	17.18	16.96	22.1	22.42
		25N	16.69	16.58	26.69	26.16	21.43	21.42	29.65	29.82	22.76	22.73	25.66	25.7	23.83	23.96	26.07	26.04	23.93	23.86	32.37	32.95	17.52	17.59	21.25	21.48
		26N	18.98	18.98	28.87	28.81	23	23.06	30.22	29.81	23.67	23.69	25.1	25.01	24.83	24.82	26	26.01	26.48	26.71	34.51	36.62	17.4	17.72	23.79	23.97
		27N	17.49	17.35	27.09	27.09	21.94	21.96	24.54	24.67	24.14	24.27	25.94	26.01	24.58	24.56	26.05	26.04	25.12	25.19	34.03	36.05	17.85	17.89	21.87	23.32
		28N	17.24	17.43	27.65	27.71	21.72	21.82	29.23	29.86	22.95	23.06	24.04	24.13	23.94	23.99	25.97	25.48	23.44	23.47	35.69	35.33	16.93	17.23	23.26	24.02
		29N	16.77	16.8	27.27	27.79	22.15	22.31	29.33	29.34	23.04	23.08	24.52	24.47	24.25	24.32	25.71	25.74	23.83	23.8	35.45	36.65	16.61	16.78	22.62	23.06
		30N	17.37	17.57	26.61	26.72	21.63	21.61	29.27	29.39	23.52	23.53	25.53	25.42	23.62	23.59	25.75	25.68	23.52	23.42	34.44	34.07	17.08	17.07	21.91	22.27
		31N	17.84	17.58	26.47	26.72	21.36	21.39	29.09	29.27	22.14	22.39	24.38	24.53	23.65	23.72	25.51	25.41	23.37	23.37	33.91	34.75	17.05	17.29	22.75	22.68
		32N	17.24	17.28	26.29	26.37	21.61	21.59	28.05	28.05	24.84	24.91	26.8	26.74	23.58	23.61	25.72	25.58	23.39	23.49	34.25	34.47	16.9	17.04	22.79	22.96
		33N	17.3	16.98	26.29	26.54	21.6	21.49	27.48	27.6	22.75	22.66	25.53	25.62	24.07	23.92	25.55	25.49	23.27	23.35	33.74	33.49	17.03	17.01	22.79	23.1
		34N	18.33	18.3	27.75	28.02	22.41	22.39	29.79	29.94	23	22.99	25.53	25.44	24.57	24.48	25.91	25.91	25.17	25.2	33.83	36.73	16.96	17.11	23.89	23.5
		35N	22.16	22.19	28.44	28.63	23.52	23.51	31.44	31.36	23.92	23.95	25.6	25.64	25.4	25.39	26.48	26.34	27.47	27.51	36.35	38.39	18.24	18.33	23.18	23.34
		1T	13.66	13.81	24.96	24.95	20.06	20.06	26.91	27.32	21.06	21.11	23.26	23.31	22.07	21.95	23.7	23.54	22.36	22.31	28.92	28.87	15.34	15.34	20.12	20.4
		3T	15.86	15.5	26.91	27.95	21.37	21.31	29.91	31.17	25.32	25.71	26.41	27.66	22.58	22.6	26.96	27.44	25.22	24.26	31.7	31.94	19.05	16.9	22.31	21.83
		4T	14.94	15.11	26.7	26.85	21.79	21.9	29.17	29.12	22.53	22.51	24.21	24.21	22.77	22.8	25.41	25.4	24.31	24.28	30.73	30.89	16.94	16.94	20.69	20.75
		5T	14.52	14.53	27.37	27.14	21.51	21.54	29.74	29.8	21.46	21.45	23.18	23.22	23.22	23.28	25.19	25.34	23.76	23.74	31.55	33.22	16.43	16.51	22.04	22.79
		6T	14.18	14.4	26.45	26.42	21.43	21.5	28.16	28.2	20.68	20.61	22.33	22.35	24.98	24.86	25.3	25.34	23.87	23.87	32.14	31.7	16.81	16.75	19.64	19.54
		7T	14.59	14.55	25.11	25.15	19.05	19.11	28.07	27.88	21.28	21.23	24	23.9	21.17	21.19	25.28	25.15	21.45	21.54	31	31.47	14.32	14.43	17.71	17.79
		8T	15.38	15.43	25.5	25.5	21.53	21.48	29.36	29.32	21.77	21.63	23.62	23.52	22.59	22.54	24.22	24.49	26.28	26.31	29.8	29.82	15.66	15.72	20.97	21.03
		9T	14.42	14.41	25.35	25.17	21.51	21.58	28.56	28.58	21.84	21.86	22.86	22.77	22.33	22.37	24.54	24.77	24.35	24.32	31.47	31.53	14.82	14.9	20.01	20.1
		10T	14.91	14.73	27.28	27.5	21.97	21.98	29.91	30.11	21.76	21.75	23.99	23.92	24.55	24.77	25.83	26.13	24.08	24.21	34.04	33.06	16.93	16.82	21.32	21.67
		11T	15.59	15.25	27.91	27.65	22.51	22.45	25.46	25.36	23.56	23.57	25.32	25.26	23.33	23.42	25.86	25.72	24.23	24.81	30.8	30.25	17.47	17.84	21.47	21.37
		12T	15.93	16.02	28.44	28.4	22.72	22.47	31.52	31.39	22.46	22.54	24.96	24.88	24.84	24.83	25.35	25.33	24.91	25.43	33.17	33.21	17.81	17.73	22.54	22.59
		13T	18.07	17.73	29.62	29.31	23.75	23.8	32.03	32.12	23.33	23.38	23.31	23.15	27.05	26.93	26.82	26.77	29.72	29.72	34.26	35.23	21.5	21.46	26.61	26.09
		14T	15.33	15.26	27.71	27.89	22.98	22.93	29.86	29.73	23.64	23.51	26.16	26.1	22.64	22.52	25.09	25.34	24.76	24.72	33.02	34.27	17.41	17.36	22.75	22.47
		15T	15.63	15.63	28.82	29.1	22.57	22.63	31.39	31.68	23.14	23.11	24.22	24.1	22.21	22.34	24.63	24.78	25.53	25.42	33.73	33.65	18.06	17.86	22.56	23.16
		16T	14.37	14.38	26.3	26.31	21.17	21.16	28.1	28.14	21.38	21.38	22.92	23.01	23.42	23.41	25.32	25.35	22.1	22.08	31.64	31.4	16.05	16.06	20.06	19.87
		17T	20.57	20.58	29.99	29.29	24.55	24.54	29.43	29.09	26.67	26.62	26.03	26.08	26.25	26.1	27.29	27.18	29.39	29.16	36.99	35.29	20.13	20.46	26.92	26.92
		18T	19.15	19.31	29.83	30.35	23.79	23.83	31.31	31.38	25.15	25.09	24.44	24.44	24.83	24.85	25.67	26.39	29.66	29.36	34.8	35.05	21.83	22.19	25.69	25.72
		19T	14.33	14.39	26.41	26.4	21.37	21.75	29.46	29.85	22.42	22.19	25.29	25.08	22.41	22.34	24.23	24.32	23.78	23.77	33.31	32.99	17.74	17.89	19.87	19.94
		20T	20.44	20.45	29.82	30.57	24.07	24.07	31.19	31.27	24.8	24.9	19.23	19.24	29.37	28.74	27.03	27.06	31.31	32.16	30.53	30.69	23.03	22.99	26.14	25.86
		21T	15.13	15.16	26	26.06	20.7	20.68	29.39	29.07	22.89	22.88	24.45	24.37	21.77	21.82	25.34	25.54	23.55	23.39	30.97	31.14	17.17	17.12	20.07	19.94
		22T	15.88	15.79	27.89	27.71	22.56	22.58	31.34	30.87	23.45	23.51	24.41	24.43	23.31	23.24	25.31	25.63	26.38	26.43	33.06	34.83	17.72	17.52	21.8	22.07
		23T	13.11	13.1	25.62	25.77	21.2	21.26	29.3	29.65	20.63	20.7	23.58	23.6	22.69	22.73	24.76	24.61	24.46	24.42	31.45	31.19	17.15	17.01	19.56	19.74
		24T	16.24	16.24	27.34	27.44	22.18	22.25	30.76	31.59	24.93	24.88	25.18	25.12	23.5	23.47	25.36	25.28	27	27.17	32.32	35.17	19.26	19.17	21.88	22.03
		25T	13.82	13.9	25.87	25.62	20.17	20.16	29.18	29.25	22.47	22.57	23.47	23.6	22.89	23	24.69	24.69	22.68	22.72	30.48	30.38	17.11	17.22	19.74	19.97
		26T	19.28	19.42	29.98	29.94	25.2	25.11	28.23	28.24	25.02	24.94	23.94	23.88	27.45	27.47	26.99	26.76	30.66	30.81	35.17	36.52	20.77	20.89	26.06	25.99
		27T	15.2	15.24	27.48	27.64	22.11	22.16	29.71	29.97	24.01	23.88	25.81	25.68	22.45	22.55	25.13	25.15	24.37	24.36	33.35	33.06	17.7	17.74	22.44	22.03
		28T	14.82	14.77	27.2	27.26	21.27	21.34	25.56	25.33	21.82	21.86	23.35	23.52	22.73	22.79	24.08	24.21	23.12	23.21	30.12	29.94	16.76	16.96	21.65	21.68
		29T	14.25	14.35	26.42	26.56	21.3	21.24	24.3	24.27	22.85	22.94	24.13	24.15	22.26	22.18	24.66	24.73	22.84	22.76	29.09	29.36	16.5	16.55	20.7	20.99
		30T	14.85	14.82	26.79	26.87	21.41	21.5	29.63	30.03	21.56	21.69	23.89	23.81	23.96	23.93	24.03	24.22	23.98	23.8	32.45	32.19	16.98	17.06	21.24	21.36
		31T	15.5	15.54	26.2	26.33	21.6	21.6	29.68	30.46	24.93	24.89	27.62	27.6	22.21	22.35	25.23	25.11	23.13	23.03	31.46	32.23	17.02	17.09	21.62	21.62
		32T	14.66	14.67	26.68	26.62	21.53	21.57	26.15	26.16	22.55	22.66	23.5	23.54	23.42	23.31	26	25.79	24.12	24.14	31.39	31.78	15.81	15.86	20.45	21.15
		33T	14.56	14.6	26.78	27.11	21.52	21.53	29.75	29.9	23.37	23.37	25.04	24.96	22.53	22.58	25.13	25.5	23.54	23.41	30.86	30.5	16.87	17.13	21.72	21.75
		34T	14.16	14.3	25.93	25.95	20.11	20.06	28.93	28.92	20.78	20.67	22.87	22.78	24.35	24.28	25	24.78	24.69	24.67	29.22	29.35	16.56	16.44	21.58	21.32
		35T	20.48	20.39	28.04	27.9	23.02	23.08	27.45	27.5	24.28	24.17	24.24	24.23	26.44	26.46	26.41	26.36	29.89	29.93	33.26	33.62	19.48	19.74	23.7	23.97
