# Supplementary material for: A novel panel of clinically relevant miRNAs signature accurately differentiates oral cancer from normal mucosa
Source: Front Oncol. 2022 Dec 1;12:1072579. doi: 10.3389/fonc.2022.1072579 (PMC9753689; doi:10.3389/fonc.2022.1072579)
Supplement: Supplementary Table 4 — miR-21-5p, miR-93-5p, miR-146b-5p, miR-155-5p, miR-182-5p and 453 miR-133b validated target genes used for functional enrichment analysis ( Figure 6 ) and OS/DFS 454 ( Figure 7 ). [file Table_4.xlsx]

## Sheet: mirnet_6mir_validated_targets
ID	Accession	Target	TargetID	Experiment	Literature	Tissue
hsa-mir-21-5p	MIMAT0000076	ACAT1	38	Microarray	18591254	Unspecified
hsa-mir-21-5p	MIMAT0000076	PARP1	142	Microarray	18591254	Unspecified
hsa-mir-21-5p	MIMAT0000076	JAG1	182	Flow//Immunoblot//Luciferase reporter assay//Microarray//qRT-PCR	19398721|22618231|18591254	Unspecified
hsa-mir-21-5p	MIMAT0000076	CRYBG1	202	Microarray	18591254	Unspecified
hsa-mir-21-5p	MIMAT0000076	AKT2	208	Western blot	20048743	Unspecified
hsa-mir-21-5p	MIMAT0000076	APAF1	317	Luciferase reporter assay//Microarray//qRT-PCR//Western blot	18829576|18591254|27021436	Unspecified
hsa-mir-21-5p	MIMAT0000076	APC	324	Microarray	18591254	Unspecified
hsa-mir-21-5p	MIMAT0000076	FAS	355	Microarray	20048743	Unspecified
hsa-mir-21-5p	MIMAT0000076	FASLG	356	Luciferase reporter assay//qRT-PCR//Reporter assay//Western blot	21820586|23177026|20371612|23504349|24821435|25118289	Unspecified
hsa-mir-21-5p	MIMAT0000076	RHOB	388	Luciferase reporter assay//qRT-PCR//Western blot	20460403|21347332|21872591|23313253	Unspecified
hsa-mir-21-5p	MIMAT0000076	ATP2B4	493	Microarray	18591254	Unspecified
hsa-mir-21-5p	MIMAT0000076	ATRX	546	Microarray	18591254	Unspecified
hsa-mir-21-5p	MIMAT0000076	BCAT1	586	Microarray	18591254	Unspecified
hsa-mir-21-5p	MIMAT0000076	BCL2	596	ChIP-seq//Immunofluorescence//Luciferase reporter assay//qRT-PCR//Western blot	17072344|21376256|22528454|22710123|21468550|20048743|24606718|25327529	Unspecified
hsa-mir-21-5p	MIMAT0000076	BCL6	604	Luciferase reporter assay	23416424	Unspecified
hsa-mir-21-5p	MIMAT0000076	BCL7A	605	HITS-CLIP	22473208	Unspecified
hsa-mir-21-5p	MIMAT0000076	BMI1	648	ChIP-seq//Immunofluorescence//Immunohistochemistry//Luciferase reporter assay//qRT-PCR//Western blot	27644439	Unspecified
hsa-mir-21-5p	MIMAT0000076	BMPR2	659	Luciferase reporter assay//Microarray//qRT-PCR//Western blot	19578724|18829576|18591254|22227207	Unspecified
hsa-mir-21-5p	MIMAT0000076	BNIP2	663	HITS-CLIP	22473208	Unspecified
hsa-mir-21-5p	MIMAT0000076	BRCA1	672	Microarray	18591254	Unspecified
hsa-mir-21-5p	MIMAT0000076	KLF9	687	Sequencing	20371350	Unspecified
hsa-mir-21-5p	MIMAT0000076	KLF5	688	Microarray	18591254	Unspecified
hsa-mir-21-5p	MIMAT0000076	CALD1	800	Microarray	18591254	Unspecified
hsa-mir-21-5p	MIMAT0000076	CASP8	841	In situ hybridization//Luciferase reporter assay//Northern blot//qRT-PCR//Western blot	26080425	Unspecified
hsa-mir-21-5p	MIMAT0000076	KRIT1	889	HITS-CLIP	22473208	Unspecified
hsa-mir-21-5p	MIMAT0000076	CCNG1	900	Microarray	18591254	Unspecified
hsa-mir-21-5p	MIMAT0000076	CD47	961	Microarray	18591254	Unspecified
hsa-mir-21-5p	MIMAT0000076	CDC25A	993	HITS-CLIP//Luciferase reporter assay//Microarray//Northern blot//qRT-PCR//Western blot	19826040|23496142|18591254|22473208|25378484	Unspecified
hsa-mir-21-5p	MIMAT0000076	CDK6	1021	Sequencing	20371350	Unspecified
hsa-mir-21-5p	MIMAT0000076	CEBPB	1051	Luciferase reporter assay//Western blot	25327529	Unspecified
hsa-mir-21-5p	MIMAT0000076	FOXN3	1112	Microarray	18591254	Unspecified
hsa-mir-21-5p	MIMAT0000076	CLCN5	1184	Microarray	18591254	Unspecified
hsa-mir-21-5p	MIMAT0000076	CLU	1191	Luciferase reporter assay	24327270	Unspecified
hsa-mir-21-5p	MIMAT0000076	CCR1	1230	Luciferase reporter assay	21131358	Unspecified
hsa-mir-21-5p	MIMAT0000076	CCR7	1236	HITS-CLIP	22473208	Unspecified
hsa-mir-21-5p	MIMAT0000076	COL4A1	1282	Luciferase reporter assay//qRT-PCR	22573493	Unspecified
hsa-mir-21-5p	MIMAT0000076	COL5A2	1290	Microarray	18591254	Unspecified
hsa-mir-21-5p	MIMAT0000076	SLC31A1	1317	Microarray	18591254	Unspecified
hsa-mir-21-5p	MIMAT0000076	ATF2	1386	Microarray	18591254	Unspecified
hsa-mir-21-5p	MIMAT0000076	HAPLN1	1404	Microarray	18591254	Unspecified
hsa-mir-21-5p	MIMAT0000076	CSNK1A1	1452	Microarray	18591254	Unspecified
hsa-mir-21-5p	MIMAT0000076	DAXX	1616	Luciferase reporter assay//qRT-PCR//Western blot	18829576	Unspecified
hsa-mir-21-5p	MIMAT0000076	DDX3X	1654	Microarray	18591254	Unspecified
hsa-mir-21-5p	MIMAT0000076	DLG1	1739	Microarray	18591254	Unspecified
hsa-mir-21-5p	MIMAT0000076	DMD	1756	Microarray	18591254	Unspecified
hsa-mir-21-5p	MIMAT0000076	DYNC1LI2	1783	Microarray	18591254	Unspecified
hsa-mir-21-5p	MIMAT0000076	SLC26A2	1836	Microarray	18591254	Unspecified
hsa-mir-21-5p	MIMAT0000076	DUSP8	1850	Microarray	18591254	Unspecified
hsa-mir-21-5p	MIMAT0000076	E2F1	1869	Luciferase reporter assay//qRT-PCR//Western blot	19906824|19528081	Unspecified
hsa-mir-21-5p	MIMAT0000076	E2F2	1870	ChIP//Northern blot//qRT-PCR	19528081	Unspecified
hsa-mir-21-5p	MIMAT0000076	E2F3	1871	PAR-CLIP	21572407	Unspecified
hsa-mir-21-5p	MIMAT0000076	MEGF9	1955	Microarray	18591254	Unspecified
hsa-mir-21-5p	MIMAT0000076	EGFR	1956	Luciferase reporter assay//Microarray//Western blot	20864407|20048743	Unspecified
hsa-mir-21-5p	MIMAT0000076	EIF1AX	1964	PAR-CLIP	23446348|20371350	Unspecified
hsa-mir-21-5p	MIMAT0000076	EIF2S1	1965	Quantitative proteomic approach	19253296	Unspecified
hsa-mir-21-5p	MIMAT0000076	EIF4A2	1974	Immunoblot//Immunohistochemistry//Luciferase reporter assay//Microarray//qRT-PCR//Western blot	21219636	Unspecified
hsa-mir-21-5p	MIMAT0000076	EIF4EBP2	1979	Microarray	18591254	Unspecified
hsa-mir-21-5p	MIMAT0000076	EIF5	1983	Microarray	18591254	Unspecified
hsa-mir-21-5p	MIMAT0000076	ELAVL4	1996	qRT-PCR	20584986	Unspecified
hsa-mir-21-5p	MIMAT0000076	EPHA4	2043	Microarray	18591254	Unspecified
hsa-mir-21-5p	MIMAT0000076	ERBB2	2064	qRT-PCR//Western blot	19419954	Unspecified
hsa-mir-21-5p	MIMAT0000076	FGF12	2257	HITS-CLIP	23824327	Unspecified
hsa-mir-21-5p	MIMAT0000076	FKBP5	2289	Microarray	18591254	Unspecified
hsa-mir-21-5p	MIMAT0000076	FOXO1	2308	Luciferase reporter assay//qRT-PCR//Western blot	25909227	Unspecified
hsa-mir-21-5p	MIMAT0000076	FOXO3	2309	PAR-CLIP	20371350	Unspecified
hsa-mir-21-5p	MIMAT0000076	FMOD	2331	Western blot	19906824	Unspecified
hsa-mir-21-5p	MIMAT0000076	FMR1	2332	Microarray	18591254	Unspecified
hsa-mir-21-5p	MIMAT0000076	GLG1	2734	Microarray	18591254	Unspecified
hsa-mir-21-5p	MIMAT0000076	GNAQ	2776	Microarray	18591254	Unspecified
hsa-mir-21-5p	MIMAT0000076	GOLGA4	2803	Microarray	18591254	Unspecified
hsa-mir-21-5p	MIMAT0000076	GP5	2814	PAR-CLIP	22012620|20371350	Unspecified
hsa-mir-21-5p	MIMAT0000076	GPD2	2820	Microarray	18591254	Unspecified
hsa-mir-21-5p	MIMAT0000076	MKNK2	2872	Microarray	18591254	Unspecified
hsa-mir-21-5p	MIMAT0000076	MSH6	2956	Luciferase reporter assay//Northern blot//qRT-PCR//Western blot	21078976	Unspecified
hsa-mir-21-5p	MIMAT0000076	GTF2A1	2957	Microarray	18591254	Unspecified
hsa-mir-21-5p	MIMAT0000076	GTF2I	2969	Microarray	18591254	Unspecified
hsa-mir-21-5p	MIMAT0000076	HIF1A	3091	ChIP-seq	23726431	Unspecified
hsa-mir-21-5p	MIMAT0000076	HMGB1	3146	Luciferase reporter assay//Western blot	25327529	Unspecified
hsa-mir-21-5p	MIMAT0000076	HMGB3	3149	Microarray	18591254	Unspecified
hsa-mir-21-5p	MIMAT0000076	HNRNPH1	3187	Microarray	18591254	Unspecified
hsa-mir-21-5p	MIMAT0000076	HNRNPK	3190	Luciferase reporter assay//qRT-PCR	18829576	Unspecified
hsa-mir-21-5p	MIMAT0000076	HOXA9	3205	ChIP-seq//Microarray	18591254|24334453	Unspecified
hsa-mir-21-5p	MIMAT0000076	HPGD	3248	In situ hybridization//Luciferase reporter assay//qRT-PCR//Western blot	24699315	Unspecified
hsa-mir-21-5p	MIMAT0000076	FOXN2	3344	PAR-CLIP	23592263	Unspecified
hsa-mir-21-5p	MIMAT0000076	ICAM1	3383	Luciferase reporter assay//Microarray//qRT-PCR	21131358	Unspecified
hsa-mir-21-5p	MIMAT0000076	IGF1R	3480	Luciferase reporter assay	24161401	Unspecified
hsa-mir-21-5p	MIMAT0000076	IL1B	3553	Luciferase reporter assay//Microarray//qRT-PCR	21131358	Unspecified
hsa-mir-21-5p	MIMAT0000076	IL12A	3592	Luciferase reporter assay//Microarray//qRT-PCR//Western blot	22815788|25327529|27571873	Unspecified
hsa-mir-21-5p	MIMAT0000076	CXCL10	3627	qRT-PCR	24889251	Unspecified
hsa-mir-21-5p	MIMAT0000076	IPP	3652	Microarray	18591254	Unspecified
hsa-mir-21-5p	MIMAT0000076	IRAK1	3654	Chip//ELISA//Flow cytometry//Luciferase reporter assay//QRTPCR//Western blot	23633945	Unspecified
hsa-mir-21-5p	MIMAT0000076	IREB2	3658	Microarray	18591254	Unspecified
hsa-mir-21-5p	MIMAT0000076	ITGB8	3696	HITS-CLIP	22473208|23824327	Unspecified
hsa-mir-21-5p	MIMAT0000076	KLK2	3817	HITS-CLIP	19536157	Unspecified
hsa-mir-21-5p	MIMAT0000076	TNPO1	3842	HITS-CLIP//Microarray	18591254|22473208	Unspecified
hsa-mir-21-5p	MIMAT0000076	LAMP2	3920	Microarray	18591254	Unspecified
hsa-mir-21-5p	MIMAT0000076	LIFR	3977	Microarray	18591254	Unspecified
hsa-mir-21-5p	MIMAT0000076	LRP6	4040	Luciferase reporter assay//qRT-PCR//Western blot	28337300	Unspecified
hsa-mir-21-5p	MIMAT0000076	CAPRIN1	4076	Microarray	18591254	Unspecified
hsa-mir-21-5p	MIMAT0000076	MARCKS	4082	Luciferase reporter assay//Western blot	19302977	Unspecified
hsa-mir-21-5p	MIMAT0000076	SMAD7	4092	Immunocytochemistry//Immunofluorescence//Immunohistochemistry//Luciferase reporter assay//qRT-PCR//Western blot	23292313|24887517|28192117|26575121	Unspecified
hsa-mir-21-5p	MIMAT0000076	MBNL1	4154	HITS-CLIP//PAR-CLIP//Sequencing	20371350|22473208|23446348	Unspecified
hsa-mir-21-5p	MIMAT0000076	MDM4	4194	Microarray	18591254	Unspecified
hsa-mir-21-5p	MIMAT0000076	MEF2A	4205	Microarray	18591254	Unspecified
hsa-mir-21-5p	MIMAT0000076	MEF2C	4208	Immunofluorescence//In situ hybridization//Luciferase reporter assay	21170291	Unspecified
hsa-mir-21-5p	MIMAT0000076	MEIS1	4211	Microarray	18591254	Unspecified
hsa-mir-21-5p	MIMAT0000076	MAP3K1	4214	Microarray	18591254	Unspecified
hsa-mir-21-5p	MIMAT0000076	MMP2	4313	qRT-PCR	19435867	Unspecified
hsa-mir-21-5p	MIMAT0000076	MMP9	4318	qRT-PCR	19435867	Unspecified
hsa-mir-21-5p	MIMAT0000076	MSH2	4436	Immunoblot//Luciferase reporter assay//Microarray//Northern blot//qRT-PCR//Western blot	21078976|21047769|18591254|23861444|22806311	Unspecified
hsa-mir-21-5p	MIMAT0000076	MTAP	4507	Luciferase reporter assay//Microarray//Northern blot//qRT-PCR//Western blot	19013014|18591254	Unspecified
hsa-mir-21-5p	MIMAT0000076	COX2	4513	Flow//qRT-PCR//Western blot	26604791	Unspecified
hsa-mir-21-5p	MIMAT0000076	MUC1	4582	Microarray	18591254	Unspecified
hsa-mir-21-5p	MIMAT0000076	MYC	4609	ChIP//Northern blot//qRT-PCR//TRAP	19528081|24510096	Unspecified
hsa-mir-21-5p	MIMAT0000076	MYD88	4615	Chip//ELISA//Flow cytometry//Luciferase reporter assay//QRTPCR//Western blot	23633945	Unspecified
hsa-mir-21-5p	MIMAT0000076	MYO9A	4649	Microarray	18591254	Unspecified
hsa-mir-21-5p	MIMAT0000076	SEPT2	4735	HITS-CLIP	22473208	Unspecified
hsa-mir-21-5p	MIMAT0000076	NEK1	4750	Microarray	18591254	Unspecified
hsa-mir-21-5p	MIMAT0000076	NFIA	4774	Flow//Western blot	24980967	Unspecified
hsa-mir-21-5p	MIMAT0000076	NFIB	4781	Luciferase reporter assay//qRT-PCR//Western blot	18384814	Unspecified
hsa-mir-21-5p	MIMAT0000076	NFKB1	4790	ChIP-seq	21081469	Unspecified
hsa-mir-21-5p	MIMAT0000076	NKTR	4820	Microarray	20371350|18591254	Unspecified
hsa-mir-21-5p	MIMAT0000076	NTF3	4908	Luciferase reporter assay//qRT-PCR	22019057	Unspecified
hsa-mir-21-5p	MIMAT0000076	DDR2	4921	Microarray	18591254	Unspecified
hsa-mir-21-5p	MIMAT0000076	OLR1	4973	Microarray	18591254	Unspecified
hsa-mir-21-5p	MIMAT0000076	TNFRSF11B	4982	Microarray	20371350	Unspecified
hsa-mir-21-5p	MIMAT0000076	ORC4	5000	PAR-CLIP	22012620	Unspecified
hsa-mir-21-5p	MIMAT0000076	OXTR	5021	Luciferase reporter assay	26273428	Unspecified
hsa-mir-21-5p	MIMAT0000076	PBX1	5087	ChIP-seq//Microarray	18591254|24334453	Unspecified
hsa-mir-21-5p	MIMAT0000076	PCBP1	5093	Luciferase reporter assay//Quantitative proteomic approach	19253296|22316494	Unspecified
hsa-mir-21-5p	MIMAT0000076	PDHA2	5161	Quantitative proteomic approach	19253296	Unspecified
hsa-mir-21-5p	MIMAT0000076	PFKFB2	5208	Microarray	18591254	Unspecified
hsa-mir-21-5p	MIMAT0000076	ABCB1	5243	Flow//qRT-PCR//Western blot	27040946	Unspecified
hsa-mir-21-5p	MIMAT0000076	SERPINB5	5268	ChIP-seq//Immunohistochemistry//Immunoprecipitaion//Luciferase reporter assay//Microarray//qRT-PCR//Reporter assay//Western blot	18270520|19253296|21636785|20693317|26296971|27409165	Unspecified
hsa-mir-21-5p	MIMAT0000076	SERPINI1	5274	Flow//Immunohistochemistry//Luciferase reporter assay//Microarray//qRT-PCR//Western blot	18591254|22464652	Unspecified
hsa-mir-21-5p	MIMAT0000076	PIK3C2A	5286	Microarray	18591254	Unspecified
hsa-mir-21-5p	MIMAT0000076	PIK3R1	5295	Luciferase reporter assay//Microarray//qRT-PCR//Western blot	18591254|26676464	Unspecified
hsa-mir-21-5p	MIMAT0000076	PKD2	5311	Microarray	18591254	Unspecified
hsa-mir-21-5p	MIMAT0000076	PKNOX1	5316	Microarray	18591254	Unspecified
hsa-mir-21-5p	MIMAT0000076	PLAT	5327	Luciferase reporter assay//Microarray//qRT-PCR	21131358	Unspecified
hsa-mir-21-5p	MIMAT0000076	PLD1	5337	Microarray	18591254	Unspecified
hsa-mir-21-5p	MIMAT0000076	PPARA	5465	Flow//Immunofluorescence//Immunohistochemistry//Immunoprecipitaion//In situ hybridization//Luciferase reporter assay//Microarray//qRT-PCR//Western blot	21636785|18591254|24012640|26338827	Unspecified
hsa-mir-21-5p	MIMAT0000076	PRKAB2	5565	Microarray	18591254	Unspecified
hsa-mir-21-5p	MIMAT0000076	PRKCE	5581	Microarray	18591254	Unspecified
hsa-mir-21-5p	MIMAT0000076	MAP2K3	5606	Immunohistochemistry//Luciferase reporter assay//Western blot	24112539	Unspecified
hsa-mir-21-5p	MIMAT0000076	PSMD9	5715	Flow//qRT-PCR//Western blot	26500453	Unspecified
hsa-mir-21-5p	MIMAT0000076	PTEN	5728	//ASO assay//ELISA//FACS//Flow//GFP reporter assay//Immunoblot//Immunocytochemistry//Immunofluorescence//immunohistochemistry//Immunohistochemistry//Luciferase reporter assay//Microarray//Northern blot//qRT-PCR//Reporter assay//Western blot	19672202|19072831|19906824|18850008|20216554|20223231|19175831|20048743|20813833|19641183|19253296|17681183|16762633|20797623|20978511|21187093|21820606|22267008|19473551|22678116|22956424|22761812|22770403|22879939|23226804|21544242|24817011|23548551|23174819|23466500|24154840|24659669|22956257|24603539|24468088|24356956|23811941|24161401|23981302|23643356|23275230|23446999|23708209|25361012|268…	Unspecified
hsa-mir-21-5p	MIMAT0000076	PTGFR	5737	Microarray	18591254	Unspecified
hsa-mir-21-5p	MIMAT0000076	PTK2	5747	Microarray	18591254	Unspecified
hsa-mir-21-5p	MIMAT0000076	PTPN3	5774	Microarray	18591254	Unspecified
hsa-mir-21-5p	MIMAT0000076	PTPN14	5784	Immunohistochemistry//Luciferase reporter assay//Microarray//PAR-CLIP//qRT-PCR//Western blot	20048743|23592263|25803229	Unspecified
hsa-mir-21-5p	MIMAT0000076	PTX3	5806	Luciferase reporter assay	21131358	Unspecified
hsa-mir-21-5p	MIMAT0000076	PURA	5813	Microarray	18591254	Unspecified
hsa-mir-21-5p	MIMAT0000076	PURB	5814	Microarray	18591254	Unspecified
hsa-mir-21-5p	MIMAT0000076	ABCD3	5825	Microarray	18591254	Unspecified
hsa-mir-21-5p	MIMAT0000076	RAB6A	5870	Microarray	18591254	Unspecified
hsa-mir-21-5p	MIMAT0000076	RASA1	5921	Luciferase reporter assay//qRT-PCR//Western blot	18372920|25663768|27876571	Unspecified
hsa-mir-21-5p	MIMAT0000076	RB1	5925	Microarray	18591254	Unspecified
hsa-mir-21-5p	MIMAT0000076	ARID4A	5926	Microarray	18591254	Unspecified
hsa-mir-21-5p	MIMAT0000076	REST	5978	Luciferase reporter assay	19242418	Unspecified
hsa-mir-21-5p	MIMAT0000076	REV3L	5980	Microarray	18591254	Unspecified
hsa-mir-21-5p	MIMAT0000076	RHO	6010	qRT-PCR//Western blot	23446999	Unspecified
hsa-mir-21-5p	MIMAT0000076	RNF6	6049	PAR-CLIP	21572407	Unspecified
hsa-mir-21-5p	MIMAT0000076	RP2	6102	Microarray	18591254	Unspecified
hsa-mir-21-5p	MIMAT0000076	RPS6KA3	6197	Microarray	18591254	Unspecified
hsa-mir-21-5p	MIMAT0000076	RPS7	6201	Microarray//qRT-PCR//Quantitative proteomic approach//Sequencing//Western blot	19253296|20371350|17968323|17991735|19682430|19276261|19419954|18850008|16966691|19672202|19342589|21069438|18270520|19836969|19133651|18372920|18591254	Unspecified
hsa-mir-21-5p	MIMAT0000076	SATB1	6304	qRT-PCR//Western blot	22227207	Unspecified
hsa-mir-21-5p	MIMAT0000076	CCL1	6346	HITS-CLIP	22473208	Unspecified
hsa-mir-21-5p	MIMAT0000076	CCL20	6364	ELISA//Immunofluorescence//Immunohistochemistry//In situ hybridization//Luciferase reporter assay//qRT-PCR	22001440|23817679	Unspecified
hsa-mir-21-5p	MIMAT0000076	TRAPPC2	6399	Microarray	18591254	Unspecified
hsa-mir-21-5p	MIMAT0000076	SET	6418	HITS-CLIP	22473208	Unspecified
hsa-mir-21-5p	MIMAT0000076	SGCB	6443	Microarray	18591254	Unspecified
hsa-mir-21-5p	MIMAT0000076	ST6GAL1	6480	HITS-CLIP//Microarray	18591254|22473208	Unspecified
hsa-mir-21-5p	MIMAT0000076	SKP2	6502	Microarray	18591254	Unspecified
hsa-mir-21-5p	MIMAT0000076	SLC5A3	6526	Microarray	18591254	Unspecified
hsa-mir-21-5p	MIMAT0000076	SMARCA4	6597	Luciferase reporter assay//qRT-PCR//Western blot	21317927	Unspecified
hsa-mir-21-5p	MIMAT0000076	SMN1	6606	Luciferase reporter assay//Western blot	23657402	Unspecified
hsa-mir-21-5p	MIMAT0000076	SOD3	6649	Luciferase reporter assay	22836756	Unspecified
hsa-mir-21-5p	MIMAT0000076	SOX2	6657	Immunoblot//Immunofluorescence//Immunohistochemistry//In situ hybridization//Luciferase reporter assay//Microarray//Northern blot//qRT-PCR//Western blot	18591254|22931209|26558781	Unspecified
hsa-mir-21-5p	MIMAT0000076	SOX5	6660	Luciferase reporter assay//Microarray//Northern blot//qRT-PCR//Western blot	19013014|18591254	Unspecified
hsa-mir-21-5p	MIMAT0000076	SP1	6667	Luciferase reporter assay//Western blot	22034194	Unspecified
hsa-mir-21-5p	MIMAT0000076	SRPK2	6733	Microarray	18591254	Unspecified
hsa-mir-21-5p	MIMAT0000076	SSFA2	6744	Microarray	18591254	Unspecified
hsa-mir-21-5p	MIMAT0000076	STAT3	6774	ELISA//Microarray//qRT-PCR//Western blot	20048743|18591254|23998932|26549725	Unspecified
hsa-mir-21-5p	MIMAT0000076	ELOVL4	6785	Microarray	18591254	Unspecified
hsa-mir-21-5p	MIMAT0000076	TAF1	6872	Microarray	18591254	Unspecified
hsa-mir-21-5p	MIMAT0000076	TAF5	6877	Microarray	18591254	Unspecified
hsa-mir-21-5p	MIMAT0000076	TAP1	6890	Luciferase reporter assay//Western blot	25327529	Unspecified
hsa-mir-21-5p	MIMAT0000076	TCF21	6943	Luciferase reporter assay	23206776	Unspecified
hsa-mir-21-5p	MIMAT0000076	TGFB1	7040	ELISA//Microarray//qRT-PCR	18591254|26383248	Unspecified
hsa-mir-21-5p	MIMAT0000076	TGFB2	7042	Luciferase reporter assay//Microarray	18591254|27388239	Unspecified
hsa-mir-21-5p	MIMAT0000076	TGFBI	7045	Luciferase reporter assay//Microarray//Western blot	19136465|18591254	Unspecified
hsa-mir-21-5p	MIMAT0000076	TGFBR2	7048	Immunofluorescence//Luciferase reporter assay//Microarray//qRT-PCR//Reporter assay//Western blot	19906824|19816956|18829576|22072622|18591254|24037531|27388239	Unspecified
hsa-mir-21-5p	MIMAT0000076	TGFBR3	7049	Luciferase reporter assay//Microarray//qRT-PCR	18829576|19253296	Unspecified
hsa-mir-21-5p	MIMAT0000076	TGIF1	7050	Western blot	19906824	Unspecified
hsa-mir-21-5p	MIMAT0000076	TIAM1	7074	Luciferase reporter assay//Microarray//Northern blot//qRT-PCR	20826792|23442323|22815788	Unspecified
hsa-mir-21-5p	MIMAT0000076	TIMP3	7078	Immunofluorescence//Immunohistochemistry//In situ hybridization//Luciferase reporter assay//Microarray//qRT-PCR//Reporter assay//Western blot	18591254|20346171|21820586|23504349|24574341	Unspecified
hsa-mir-21-5p	MIMAT0000076	TLR3	7098	Luciferase reporter assay//Western blot	25327529	Unspecified
hsa-mir-21-5p	MIMAT0000076	TLR4	7099	Microarray	18591254	Unspecified
hsa-mir-21-5p	MIMAT0000076	TNFAIP3	7128	Luciferase reporter assay	21131358	Unspecified
hsa-mir-21-5p	MIMAT0000076	TOP2A	7153	Microarray	18591254	Unspecified
hsa-mir-21-5p	MIMAT0000076	TP53BP2	7159	Luciferase reporter assay//qRT-PCR	18829576	Unspecified
hsa-mir-21-5p	MIMAT0000076	TPM1	7168	Luciferase reporter assay//Microarray//qRT-PCR//Western blot	17363372|18270520|19253296|21817107|18591254	Unspecified
hsa-mir-21-5p	MIMAT0000076	NR2C2	7182	Microarray	18591254	Unspecified
hsa-mir-21-5p	MIMAT0000076	TSNAX	7257	Microarray	18591254	Unspecified
hsa-mir-21-5p	MIMAT0000076	UBE2N	7334	Luciferase reporter assay//Western blot	25327529	Unspecified
hsa-mir-21-5p	MIMAT0000076	UQCRB	7381	PAR-CLIP	23446348|22012620	Unspecified
hsa-mir-21-5p	MIMAT0000076	UTRN	7402	Microarray	18591254	Unspecified
hsa-mir-21-5p	MIMAT0000076	VEGFA	7422	qRT-PCR//Western blot	19435867|21544242	Unspecified
hsa-mir-21-5p	MIMAT0000076	VHL	7428	Immunofluorescence//Immunohistochemistry//Immunoprecipitaion//Luciferase reporter assay//qRT-PCR//Western blot	24012640	Unspecified
hsa-mir-21-5p	MIMAT0000076	CORO2A	7464	Microarray	19342589	Unspecified
hsa-mir-21-5p	MIMAT0000076	WFS1	7466	Quantitative proteomic approach	19253296	Unspecified
hsa-mir-21-5p	MIMAT0000076	NSD2	7468	Microarray	18591254	Unspecified
hsa-mir-21-5p	MIMAT0000076	WNT5A	7474	Microarray	18591254	Unspecified
hsa-mir-21-5p	MIMAT0000076	ZNF35	7584	Sequencing	20371350	Unspecified
hsa-mir-21-5p	MIMAT0000076	PCGF2	7703	qRT-PCR//Western blot	27542229	Unspecified
hsa-mir-21-5p	MIMAT0000076	ZMYM2	7750	Microarray	18591254	Unspecified
hsa-mir-21-5p	MIMAT0000076	ZNF207	7756	Microarray	18591254	Unspecified
hsa-mir-21-5p	MIMAT0000076	ZNF217	7764	Microarray	18591254	Unspecified
hsa-mir-21-5p	MIMAT0000076	BTG2	7832	GFP reporter assay//Luciferase reporter assay//Microarray//qRT-PCR//semi-qRT-PCR//Sequencing//Western blot	19546886|20371350|18591254|23857284|24821435|23446999	Unspecified
hsa-mir-21-5p	MIMAT0000076	ALMS1	7840	Microarray	18591254	Unspecified
hsa-mir-21-5p	MIMAT0000076	RNF103	7844	HITS-CLIP	22473208	Unspecified
hsa-mir-21-5p	MIMAT0000076	SLMAP	7871	HITS-CLIP//Microarray	18591254|22473208	Unspecified
hsa-mir-21-5p	MIMAT0000076	USP7	7874	Microarray	18591254	Unspecified
hsa-mir-21-5p	MIMAT0000076	EPM2A	7957	Microarray	18591254	Unspecified
hsa-mir-21-5p	MIMAT0000076	KAT6A	7994	Microarray	20371350	Unspecified
hsa-mir-21-5p	MIMAT0000076	CDK2AP1	8099	Luciferase reporter assay//qRT-PCR//Reporter assay//Western blot	21328460	Unspecified
hsa-mir-21-5p	MIMAT0000076	ANP32A	8125	Luciferase reporter assay//qRT-PCR//Western blot	21317927	Unspecified
hsa-mir-21-5p	MIMAT0000076	GDF5	8200	Luciferase reporter assay//qRT-PCR//Western blot	24577233	Unspecified
hsa-mir-21-5p	MIMAT0000076	NCOA3	8202	Luciferase reporter assay	19528081	Unspecified
hsa-mir-21-5p	MIMAT0000076	SMC1A	8243	Microarray	18591254	Unspecified
hsa-mir-21-5p	MIMAT0000076	FZD6	8323	Luciferase reporter assay//qRT-PCR//Western blot	27347343	Unspecified
hsa-mir-21-5p	MIMAT0000076	RECK	8434	Immunofluorescence//Immunohistochemistry//Luciferase reporter assay//Microarray//qRT-PCR//Reporter assay//Western blot	20480266|18794849|18591254|20154725|22630347|23504349|24594117|23811941|23708209|26741162	Unspecified
hsa-mir-21-5p	MIMAT0000076	PPFIA4	8497	Microarray	18591254	Unspecified
hsa-mir-21-5p	MIMAT0000076	CBX4	8535	Luciferase reporter assay//PAR-CLIP//Western blot	23592263|24398324|21572407|25327529|26701625|27292025	Unspecified
hsa-mir-21-5p	MIMAT0000076	PLPP1	8611	Microarray	18591254	Unspecified
hsa-mir-21-5p	MIMAT0000076	TP63	8626	Luciferase reporter assay//qRT-PCR//Western blot	18829576	Unspecified
hsa-mir-21-5p	MIMAT0000076	SOCS1	8651	Luciferase reporter assay//qRT-PCR//Western blot	27811366	Unspecified
hsa-mir-21-5p	MIMAT0000076	B3GALNT1	8706	Microarray	18591254	Unspecified
hsa-mir-21-5p	MIMAT0000076	TNFRSF10B	8795	HITS-CLIP//Luciferase reporter assay	22473208|25118289	Unspecified
hsa-mir-21-5p	MIMAT0000076	PER3	8863	Microarray	18591254	Unspecified
hsa-mir-21-5p	MIMAT0000076	PER2	8864	HITS-CLIP	23824327	Unspecified
hsa-mir-21-5p	MIMAT0000076	FUBP1	8880	Microarray	18591254	Unspecified
hsa-mir-21-5p	MIMAT0000076	BCL10	8915	Luciferase reporter assay//Western blot	25327529	Unspecified
hsa-mir-21-5p	MIMAT0000076	PLOD3	8985	Luciferase reporter assay//Quantitative proteomic approach	19253296	Unspecified
hsa-mir-21-5p	MIMAT0000076	BAZ1B	9031	Microarray	18591254	Unspecified
hsa-mir-21-5p	MIMAT0000076	SEMA5A	9037	Microarray	18591254	Unspecified
hsa-mir-21-5p	MIMAT0000076	LATS1	9113	Microarray	18591254	Unspecified
hsa-mir-21-5p	MIMAT0000076	SCAF11	9169	Microarray	18591254	Unspecified
hsa-mir-21-5p	MIMAT0000076	LRRFIP1	9208	Immunohistochemistry//Luciferase reporter assay//semi-qRT-PCR//Western blot	19559015|24690174	Unspecified
hsa-mir-21-5p	MIMAT0000076	SRSF11	9295	Microarray	18591254	Unspecified
hsa-mir-21-5p	MIMAT0000076	SOCS6	9306	Luciferase reporter assay//Next Generation Sequencing (NGS)//qRT-PCR//Western blot	27570566|27811366	Unspecified
hsa-mir-21-5p	MIMAT0000076	VPS26A	9559	Microarray	18591254	Unspecified
hsa-mir-21-5p	MIMAT0000076	CLOCK	9575	Microarray	18591254	Unspecified
hsa-mir-21-5p	MIMAT0000076	PREPL	9581	Microarray	18591254	Unspecified
hsa-mir-21-5p	MIMAT0000076	SOCS5	9655	Microarray	18591254	Unspecified
hsa-mir-21-5p	MIMAT0000076	SECISBP2L	9728	Microarray//qRT-PCR	22815788	Unspecified
hsa-mir-21-5p	MIMAT0000076	DOCK4	9732	Immunoblot//Luciferase reporter assay//qRT-PCR	22158624	Unspecified
hsa-mir-21-5p	MIMAT0000076	USP34	9736	Microarray	18591254	Unspecified
hsa-mir-21-5p	MIMAT0000076	SLK	9748	Microarray	20371350|18591254	Unspecified
hsa-mir-21-5p	MIMAT0000076	PHACTR2	9749	Microarray	18591254	Unspecified
hsa-mir-21-5p	MIMAT0000076	ZFYVE16	9765	Microarray	18591254	Unspecified
hsa-mir-21-5p	MIMAT0000076	JADE3	9767	Microarray	18591254	Unspecified
hsa-mir-21-5p	MIMAT0000076	CKAP5	9793	Microarray	18591254	Unspecified
hsa-mir-21-5p	MIMAT0000076	SCRN1	9805	Microarray	18591254	Unspecified
hsa-mir-21-5p	MIMAT0000076	EPM2AIP1	9852	HITS-CLIP	22473208|27418678	Unspecified
hsa-mir-21-5p	MIMAT0000076	DDX46	9879	Microarray	18591254	Unspecified
hsa-mir-21-5p	MIMAT0000076	FAM20B	9917	Microarray	18591254	Unspecified
hsa-mir-21-5p	MIMAT0000076	LPGAT1	9926	Microarray	18591254	Unspecified
hsa-mir-21-5p	MIMAT0000076	HS3ST3B1	9953	Sequencing	20371350	Unspecified
hsa-mir-21-5p	MIMAT0000076	DMTF1	9988	Microarray	18591254	Unspecified
hsa-mir-21-5p	MIMAT0000076	PTBP3	9991	Microarray	18591254	Unspecified
hsa-mir-21-5p	MIMAT0000076	GNE	10020	Microarray	18591254	Unspecified
hsa-mir-21-5p	MIMAT0000076	DNM1L	10059	Luciferase reporter assay//qRT-PCR//Western blot	28347692	Unspecified
hsa-mir-21-5p	MIMAT0000076	EDIL3	10085	Microarray	18591254	Unspecified
hsa-mir-21-5p	MIMAT0000076	ACTR2	10097	Microarray	18591254	Unspecified
hsa-mir-21-5p	MIMAT0000076	PPIF	10105	Luciferase reporter assay//Microarray//qRT-PCR	18829576|18591254	Unspecified
hsa-mir-21-5p	MIMAT0000076	HIPK3	10114	Microarray//qRT-PCR	22815788	Unspecified
hsa-mir-21-5p	MIMAT0000076	RASGRP1	10125	HITS-CLIP//Luciferase reporter assay//Microarray//qRT-PCR//Western blot	20483747|18591254|22473208	Unspecified
hsa-mir-21-5p	MIMAT0000076	AKAP9	10142	Microarray	19242418	Unspecified
hsa-mir-21-5p	MIMAT0000076	ADGRG2	10149	Microarray	18591254	Unspecified
hsa-mir-21-5p	MIMAT0000076	TOPORS	10210	Luciferase reporter assay//Microarray//qRT-PCR	18829576|18591254	Unspecified
hsa-mir-21-5p	MIMAT0000076	MSLN	10232	Luciferase reporter assay	28125734	Unspecified
hsa-mir-21-5p	MIMAT0000076	SPRY2	10253	Luciferase reporter assay//qRT-PCR//Western blot	18508928|21278789|23239100|25728247	Unspecified
hsa-mir-21-5p	MIMAT0000076	STUB1	10273	qRT-PCR//Western blot	26841045	Unspecified
hsa-mir-21-5p	MIMAT0000076	SMNDC1	10285	Sequencing	20371350	Unspecified
hsa-mir-21-5p	MIMAT0000076	BTN3A3	10384	HITS-CLIP	22473208	Unspecified
hsa-mir-21-5p	MIMAT0000076	PIAS3	10401	ELISA//Luciferase reporter assay//qRT-PCR//Western blot	22316494|23998932	Unspecified
hsa-mir-21-5p	MIMAT0000076	BASP1	10409	Luciferase reporter assay//Quantitative proteomic approach	19253296	Unspecified
hsa-mir-21-5p	MIMAT0000076	TESK2	10420	Microarray	18591254	Unspecified
hsa-mir-21-5p	MIMAT0000076	PGRMC2	10424	Microarray	18591254	Unspecified
hsa-mir-21-5p	MIMAT0000076	TMEM147	10430	CLASH	23622248	Unspecified
hsa-mir-21-5p	MIMAT0000076	FAM3C	10447	Microarray	18591254	Unspecified
hsa-mir-21-5p	MIMAT0000076	ECI2	10455	Sequencing	20371350	Unspecified
hsa-mir-21-5p	MIMAT0000076	TRIM38	10475	Microarray	18591254	Unspecified
hsa-mir-21-5p	MIMAT0000076	SLC9A6	10479	Microarray	18591254	Unspecified
hsa-mir-21-5p	MIMAT0000076	IVNS1ABP	10625	Microarray	18591254	Unspecified
hsa-mir-21-5p	MIMAT0000076	EXOC5	10640	Microarray	18591254	Unspecified
hsa-mir-21-5p	MIMAT0000076	NFAT5	10725	Microarray	18591254	Unspecified
hsa-mir-21-5p	MIMAT0000076	YME1L1	10730	Microarray	18591254	Unspecified
hsa-mir-21-5p	MIMAT0000076	STAG2	10735	Sequencing	20371350	Unspecified
hsa-mir-21-5p	MIMAT0000076	PHTF1	10745	Microarray	18591254	Unspecified
hsa-mir-21-5p	MIMAT0000076	MAP3K2	10746	Microarray	18591254	Unspecified
hsa-mir-21-5p	MIMAT0000076	ZNF460	10794	PAR-CLIP	23446348|20371350	Unspecified
hsa-mir-21-5p	MIMAT0000076	FRS2	10818	PAR-CLIP	22012620|21572407	Unspecified
hsa-mir-21-5p	MIMAT0000076	FAXDC2	10826	Microarray	18591254	Unspecified
hsa-mir-21-5p	MIMAT0000076	MALT1	10892	Microarray	18591254	Unspecified
hsa-mir-21-5p	MIMAT0000076	SPIN1	10927	Microarray	18591254	Unspecified
hsa-mir-21-5p	MIMAT0000076	FERMT2	10979	Microarray	20371350	Unspecified
hsa-mir-21-5p	MIMAT0000076	WWP1	11059	qRT-PCR//Western blot	22227207	Unspecified
hsa-mir-21-5p	MIMAT0000076	CNTRL	11064	Microarray	18591254	Unspecified
hsa-mir-21-5p	MIMAT0000076	DUSP10	11221	Luciferase reporter assay//qRT-PCR//Western blot	22387553	Unspecified
hsa-mir-21-5p	MIMAT0000076	SEC63	11231	Microarray	18591254	Unspecified
hsa-mir-21-5p	MIMAT0000076	HPS5	11234	Microarray	18591254	Unspecified
hsa-mir-21-5p	MIMAT0000076	FILIP1L	11259	Microarray	20371350|18591254	Unspecified
hsa-mir-21-5p	MIMAT0000076	MGAT4A	11320	Microarray	18591254	Unspecified
hsa-mir-21-5p	MIMAT0000076	COBLL1	22837	Microarray	18591254	Unspecified
hsa-mir-21-5p	MIMAT0000076	RAB11FIP2	22841	Microarray	18591254	Unspecified
hsa-mir-21-5p	MIMAT0000076	CPEB3	22849	Microarray	18591254	Unspecified
hsa-mir-21-5p	MIMAT0000076	RUFY3	22902	Microarray	18591254	Unspecified
hsa-mir-21-5p	MIMAT0000076	BTBD3	22903	Microarray	18591254	Unspecified
hsa-mir-21-5p	MIMAT0000076	SACM1L	22908	Microarray	18591254	Unspecified
hsa-mir-21-5p	MIMAT0000076	KIFAP3	22920	Microarray	18591254	Unspecified
hsa-mir-21-5p	MIMAT0000076	SIRT2	22933	Western blot	24161395	Unspecified
hsa-mir-21-5p	MIMAT0000076	NT5C2	22978	Microarray	18591254	Unspecified
hsa-mir-21-5p	MIMAT0000076	CEP152	22995	Microarray	18591254	Unspecified
hsa-mir-21-5p	MIMAT0000076	LIMCH1	22998	Microarray	18591254	Unspecified
hsa-mir-21-5p	MIMAT0000076	DAAM1	23002	Microarray	18591254	Unspecified
hsa-mir-21-5p	MIMAT0000076	PALLD	23022	Microarray	18591254	Unspecified
hsa-mir-21-5p	MIMAT0000076	ZNF292	23036	Microarray	18591254	Unspecified
hsa-mir-21-5p	MIMAT0000076	MON2	23041	Microarray	18591254	Unspecified
hsa-mir-21-5p	MIMAT0000076	FNBP1	23048	Microarray	18591254	Unspecified
hsa-mir-21-5p	MIMAT0000076	SETD1B	23067	PAR-CLIP	23592263	Unspecified
hsa-mir-21-5p	MIMAT0000076	ERP44	23071	PAR-CLIP	22100165	Unspecified
hsa-mir-21-5p	MIMAT0000076	MYCBP2	23077	Microarray	18591254	Unspecified
hsa-mir-21-5p	MIMAT0000076	CDK19	23097	Microarray	18591254	Unspecified
hsa-mir-21-5p	MIMAT0000076	TNRC6B	23112	HITS-CLIP//Microarray	18591254|22473208	Unspecified
hsa-mir-21-5p	MIMAT0000076	HIC2	23119	HITS-CLIP//PAR-CLIP	22473208|23446348|21572407|20371350	Unspecified
hsa-mir-21-5p	MIMAT0000076	GPD1L	23171	Microarray	18591254	Unspecified
hsa-mir-21-5p	MIMAT0000076	ATP11B	23200	Microarray	18591254	Unspecified
hsa-mir-21-5p	MIMAT0000076	SYNE2	23224	Microarray	18591254	Unspecified
hsa-mir-21-5p	MIMAT0000076	VPS13A	23230	Microarray	18591254	Unspecified
hsa-mir-21-5p	MIMAT0000076	ANKRD28	23243	Microarray	18591254	Unspecified
hsa-mir-21-5p	MIMAT0000076	RPRD2	23248	PAR-CLIP	23446348	Unspecified
hsa-mir-21-5p	MIMAT0000076	DDHD2	23259	Microarray	18591254	Unspecified
hsa-mir-21-5p	MIMAT0000076	MGA	23269	Microarray	17072344|21826097|17478730	Unspecified
hsa-mir-21-5p	MIMAT0000076	ATMIN	23300	Sequencing	20371350	Unspecified
hsa-mir-21-5p	MIMAT0000076	ICOSLG	23308	Luciferase reporter assay//Western blot	25327529	Unspecified
hsa-mir-21-5p	MIMAT0000076	TRIM2	23321	Microarray	18591254	Unspecified
hsa-mir-21-5p	MIMAT0000076	SASH1	23328	Microarray//qRT-PCR	18591254|22815788	Unspecified
hsa-mir-21-5p	MIMAT0000076	WDR7	23335	Microarray	18591254	Unspecified
hsa-mir-21-5p	MIMAT0000076	DNAJC16	23341	HITS-CLIP	22473208	Unspecified
hsa-mir-21-5p	MIMAT0000076	ARHGEF12	23365	Microarray	18591254	Unspecified
hsa-mir-21-5p	MIMAT0000076	NCSTN	23385	Sequencing	20371350	Unspecified
hsa-mir-21-5p	MIMAT0000076	ADNP	23394	Microarray	18591254	Unspecified
hsa-mir-21-5p	MIMAT0000076	DICER1	23405	HITS-CLIP	22473208	Unspecified
hsa-mir-21-5p	MIMAT0000076	RHOQ	23433	Microarray	18591254	Unspecified
hsa-mir-21-5p	MIMAT0000076	ISCU	23479	Immunoblot//Immunohistochemistry//Luciferase reporter assay//qRT-PCR//Western blot	20480266	Unspecified
hsa-mir-21-5p	MIMAT0000076	SUZ12	23512	Microarray	18591254	Unspecified
hsa-mir-21-5p	MIMAT0000076	MORC3	23515	Sequencing	20371350	Unspecified
hsa-mir-21-5p	MIMAT0000076	TTC33	23548	Microarray	19253296|19342589	Unspecified
hsa-mir-21-5p	MIMAT0000076	PIGN	23556	Microarray	18591254	Unspecified
hsa-mir-21-5p	MIMAT0000076	DDAH1	23576	Luciferase reporter assay//Microarray//qRT-PCR//Western blot	18591254|26455824|26741162	Unspecified
hsa-mir-21-5p	MIMAT0000076	RABGAP1	23637	Microarray	18591254	Unspecified
hsa-mir-21-5p	MIMAT0000076	TMEM2	23670	Microarray	18591254	Unspecified
hsa-mir-21-5p	MIMAT0000076	SGK3	23678	Sequencing	20371350	Unspecified
hsa-mir-21-5p	MIMAT0000076	CADM1	23705	Luciferase reporter assay	27055844	Unspecified
hsa-mir-21-5p	MIMAT0000076	TMEM245	23731	Sequencing	20371350	Unspecified
hsa-mir-21-5p	MIMAT0000076	RASGRP3	25780	Microarray	18591254	Unspecified
hsa-mir-21-5p	MIMAT0000076	ATXN10	25814	HITS-CLIP	22473208	Unspecified
hsa-mir-21-5p	MIMAT0000076	FBXL2	25827	Microarray	18591254	Unspecified
hsa-mir-21-5p	MIMAT0000076	HECTD1	25831	Microarray	18591254	Unspecified
hsa-mir-21-5p	MIMAT0000076	NIPBL	25836	Microarray	18591254	Unspecified
hsa-mir-21-5p	MIMAT0000076	C20orf194	25943	Microarray	18591254	Unspecified
hsa-mir-21-5p	MIMAT0000076	MOXD1	26002	Microarray	18591254	Unspecified
hsa-mir-21-5p	MIMAT0000076	SPATS2L	26010	Quantitative proteomic approach	19253296	Unspecified
hsa-mir-21-5p	MIMAT0000076	OSBPL3	26031	Microarray	18591254	Unspecified
hsa-mir-21-5p	MIMAT0000076	AUTS2	26053	Microarray	19253296	Unspecified
hsa-mir-21-5p	MIMAT0000076	APPL1	26060	HITS-CLIP//Microarray	18591254|22473208	Unspecified
hsa-mir-21-5p	MIMAT0000076	RAI14	26064	Microarray	18591254	Unspecified
hsa-mir-21-5p	MIMAT0000076	EDRF1	26098	HITS-CLIP	22473208	Unspecified
hsa-mir-21-5p	MIMAT0000076	WSB1	26118	HITS-CLIP	22473208	Unspecified
hsa-mir-21-5p	MIMAT0000076	GAPVD1	26130	Microarray	18591254	Unspecified
hsa-mir-21-5p	MIMAT0000076	ZBTB20	26137	Microarray	18591254	Unspecified
hsa-mir-21-5p	MIMAT0000076	FBXO3	26273	Microarray	18591254	Unspecified
hsa-mir-21-5p	MIMAT0000076	SLC17A5	26503	Microarray	18591254	Unspecified
hsa-mir-21-5p	MIMAT0000076	NBEA	26960	Microarray	18591254	Unspecified
hsa-mir-21-5p	MIMAT0000076	AP3M1	26985	Microarray	18591254	Unspecified
hsa-mir-21-5p	MIMAT0000076	RNF11	26994	Microarray	20048743|18591254	Unspecified
hsa-mir-21-5p	MIMAT0000076	AGO2	27161	PAR-CLIP//Sequencing	20371350|24398324|23446348	Unspecified
hsa-mir-21-5p	MIMAT0000076	SESN1	27244	Microarray	18591254	Unspecified
hsa-mir-21-5p	MIMAT0000076	PDCD4	27250	ASO assay//ChIP-seq//FACS//Flow//GFP reporter assay//Immunoblot//Immunofluorescence//Immunohistochemistry//In situ hybridization//Luciferase reporter assay//Microarray//Northern blot//PAR-CLIP//qRT-PCR//Quantitative proteomic approach//Reporter assay//Sequencing//Western blot//Westren blot	17968323|19672202|19509156|18372920|19682430|19906824|18270520|19013014|18850008|20143188|19836969|19419954|19133651|19264808|20056717|20831814|19641183|19253296|19276261|18829576|20533548|16966691|20978511|21469086|19473551|20219857|20371350|18591254|17991735|22766763|23548551|20372781|22212233|24659669|21572407|26028073|23811941|24732841|23827854|23824073|23417858|23708209|26367487|26864640|259…	Unspecified
hsa-mir-21-5p	MIMAT0000076	SETD2	29072	ChIP-seq//Luciferase reporter assay	24983504	Unspecified
hsa-mir-21-5p	MIMAT0000076	DSE	29940	Microarray	18591254	Unspecified
hsa-mir-21-5p	MIMAT0000076	PURG	29942	PAR-CLIP	23446348|22012620|21572407|20371350	Unspecified
hsa-mir-21-5p	MIMAT0000076	ITSN2	50618	Microarray	18591254	Unspecified
hsa-mir-21-5p	MIMAT0000076	DCAF8	50717	Microarray	20048743	Unspecified
hsa-mir-21-5p	MIMAT0000076	MYEF2	50804	Microarray	18591254	Unspecified
hsa-mir-21-5p	MIMAT0000076	FOXP3	50943	qRT-PCR	26383248	Unspecified
hsa-mir-21-5p	MIMAT0000076	VPS36	51028	Microarray	18591254	Unspecified
hsa-mir-21-5p	MIMAT0000076	PHF20L1	51105	Microarray	18591254	Unspecified
hsa-mir-21-5p	MIMAT0000076	RDH11	51109	Microarray//PAR-CLIP	17363372|19342589|18270520|18591254|27292025	Unspecified
hsa-mir-21-5p	MIMAT0000076	NIN	51199	Microarray	18591254	Unspecified
hsa-mir-21-5p	MIMAT0000076	PHF20	51230	Microarray	18591254	Unspecified
hsa-mir-21-5p	MIMAT0000076	UBR5	51366	Microarray	18591254	Unspecified
hsa-mir-21-5p	MIMAT0000076	REV1	51455	Microarray	18591254	Unspecified
hsa-mir-21-5p	MIMAT0000076	LARS	51520	Microarray	18591254	Unspecified
hsa-mir-21-5p	MIMAT0000076	VPS54	51542	Microarray	18591254	Unspecified
hsa-mir-21-5p	MIMAT0000076	ARMCX3	51566	Microarray	18591254	Unspecified
hsa-mir-21-5p	MIMAT0000076	TRIM33	51592	Microarray	18591254	Unspecified
hsa-mir-21-5p	MIMAT0000076	RAPGEF6	51735	Microarray	18591254	Unspecified
hsa-mir-21-5p	MIMAT0000076	RSF1	51773	Microarray	18591254	Unspecified
hsa-mir-21-5p	MIMAT0000076	FGFRL1	53834	HITS-CLIP	22473208	Unspecified
hsa-mir-21-5p	MIMAT0000076	ATAD2B	54454	Microarray	18591254	Unspecified
hsa-mir-21-5p	MIMAT0000076	MTMR12	54545	Microarray	18591254	Unspecified
hsa-mir-21-5p	MIMAT0000076	SGTB	54557	HITS-CLIP	22473208	Unspecified
hsa-mir-21-5p	MIMAT0000076	EGLN1	54583	Luciferase reporter assay	27030384	Unspecified
hsa-mir-21-5p	MIMAT0000076	ZRANB1	54764	Microarray	18591254	Unspecified
hsa-mir-21-5p	MIMAT0000076	RNF111	54778	HITS-CLIP	22473208	Unspecified
hsa-mir-21-5p	MIMAT0000076	KLHL24	54800	Microarray	18591254	Unspecified
hsa-mir-21-5p	MIMAT0000076	AFTPH	54812	Microarray	18591254	Unspecified
hsa-mir-21-5p	MIMAT0000076	TRPM7	54822	Microarray	18591254	Unspecified
hsa-mir-21-5p	MIMAT0000076	SNRK	54861	Microarray	18591254	Unspecified
hsa-mir-21-5p	MIMAT0000076	NSUN2	54888	HITS-CLIP	22473208	Unspecified
hsa-mir-21-5p	MIMAT0000076	NSD3	54904	Microarray	19398721	Unspecified
hsa-mir-21-5p	MIMAT0000076	PIGX	54965	Microarray	18591254	Unspecified
hsa-mir-21-5p	MIMAT0000076	PRPF39	55015	Sequencing	20371350	Unspecified
hsa-mir-21-5p	MIMAT0000076	PHIP	55023	Microarray	18591254	Unspecified
hsa-mir-21-5p	MIMAT0000076	USP47	55031	Microarray	18591254	Unspecified
hsa-mir-21-5p	MIMAT0000076	MED9	55090	HITS-CLIP	22473208	Unspecified
hsa-mir-21-5p	MIMAT0000076	RALGPS2	55103	Microarray	18591254	Unspecified
hsa-mir-21-5p	MIMAT0000076	AGGF1	55109	Microarray	18591254	Unspecified
hsa-mir-21-5p	MIMAT0000076	FIGN	55137	Microarray	18591254	Unspecified
hsa-mir-21-5p	MIMAT0000076	CENPQ	55166	HITS-CLIP	22473208	Unspecified
hsa-mir-21-5p	MIMAT0000076	MRPS10	55173	Microarray	18591254	Unspecified
hsa-mir-21-5p	MIMAT0000076	PBRM1	55193	Microarray	18591254	Unspecified
hsa-mir-21-5p	MIMAT0000076	KIAA1551	55196	Microarray	18591254	Unspecified
hsa-mir-21-5p	MIMAT0000076	ZNF532	55205	Microarray	18591254	Unspecified
hsa-mir-21-5p	MIMAT0000076	FANCI	55215	Microarray	18591254	Unspecified
hsa-mir-21-5p	MIMAT0000076	SPTLC3	55304	Microarray	18591254	Unspecified
hsa-mir-21-5p	MIMAT0000076	LIN7C	55327	Microarray	18591254	Unspecified
hsa-mir-21-5p	MIMAT0000076	STRBP	55342	Microarray	18591254	Unspecified
hsa-mir-21-5p	MIMAT0000076	YOD1	55432	Microarray//qRT-PCR//Sequencing//Western blot	20371350|18591254|22227207	Unspecified
hsa-mir-21-5p	MIMAT0000076	AP1AR	55435	HITS-CLIP	22473208	Unspecified
hsa-mir-21-5p	MIMAT0000076	ETNK1	55500	Microarray	18591254	Unspecified
hsa-mir-21-5p	MIMAT0000076	FAM46A	55603	Microarray	18591254	Unspecified
hsa-mir-21-5p	MIMAT0000076	DOCK10	55619	Microarray	18591254	Unspecified
hsa-mir-21-5p	MIMAT0000076	KANSL3	55683	PAR-CLIP	27292025	Unspecified
hsa-mir-21-5p	MIMAT0000076	POLR3B	55703	Microarray	18591254	Unspecified
hsa-mir-21-5p	MIMAT0000076	BTBD7	55727	Microarray	18591254	Unspecified
hsa-mir-21-5p	MIMAT0000076	ATF7IP	55729	HITS-CLIP	19536157	Unspecified
hsa-mir-21-5p	MIMAT0000076	ENAH	55740	Microarray	18591254	Unspecified
hsa-mir-21-5p	MIMAT0000076	DCP1A	55802	Microarray	18372920|18270520|17991735|17968323	Unspecified
hsa-mir-21-5p	MIMAT0000076	PAG1	55824	HITS-CLIP//Microarray	18591254|22473208	Unspecified
hsa-mir-21-5p	MIMAT0000076	TMX4	56255	Microarray	18591254	Unspecified
hsa-mir-21-5p	MIMAT0000076	SAR1A	56681	HITS-CLIP//Microarray	18591254|22473208	Unspecified
hsa-mir-21-5p	MIMAT0000076	JPH1	56704	Microarray	18591254	Unspecified
hsa-mir-21-5p	MIMAT0000076	UGGT1	56886	Microarray	18591254	Unspecified
hsa-mir-21-5p	MIMAT0000076	TM9SF3	56889	Luciferase reporter assay	19253296	Unspecified
hsa-mir-21-5p	MIMAT0000076	BDH2	56898	Microarray	20048743	Unspecified
hsa-mir-21-5p	MIMAT0000076	KNL1	57082	Microarray	18591254	Unspecified
hsa-mir-21-5p	MIMAT0000076	PITHD1	57095	PAR-CLIP	23592263|21572407|20371350|26701625	Unspecified
hsa-mir-21-5p	MIMAT0000076	RTN4	57142	HITS-CLIP//Luciferase reporter assay//Quantitative proteomic approach	19253296|22473208	Unspecified
hsa-mir-21-5p	MIMAT0000076	PELI1	57162	HITS-CLIP//Microarray//qRT-PCR//Sequencing	20371350|18591254|22473208|22815788	Unspecified
hsa-mir-21-5p	MIMAT0000076	THOC2	57187	Microarray	18591254	Unspecified
hsa-mir-21-5p	MIMAT0000076	RAB22A	57403	HITS-CLIP//Microarray	18591254|22473208|23313552	Unspecified
hsa-mir-21-5p	MIMAT0000076	ESYT2	57488	Microarray	18591254	Unspecified
hsa-mir-21-5p	MIMAT0000076	NUFIP2	57532	Sequencing	20371350	Unspecified
hsa-mir-21-5p	MIMAT0000076	MIB1	57534	Microarray	18591254	Unspecified
hsa-mir-21-5p	MIMAT0000076	KLHL42	57542	HITS-CLIP//Microarray	18591254|22473208	Unspecified
hsa-mir-21-5p	MIMAT0000076	ARHGAP21	57584	Microarray	18591254	Unspecified
hsa-mir-21-5p	MIMAT0000076	SLAIN2	57606	Microarray	18591254	Unspecified
hsa-mir-21-5p	MIMAT0000076	TSHZ3	57616	Microarray	18591254	Unspecified
hsa-mir-21-5p	MIMAT0000076	GPAM	57678	Microarray	18591254	Unspecified
hsa-mir-21-5p	MIMAT0000076	DDX55	57696	PAR-CLIP	23446348|21572407	Unspecified
hsa-mir-21-5p	MIMAT0000076	PLEKHA1	59338	Microarray	18591254	Unspecified
hsa-mir-21-5p	MIMAT0000076	PLEKHA2	59339	PAR-CLIP	22100165	Unspecified
hsa-mir-21-5p	MIMAT0000076	GNB4	59345	Sequencing	20371350	Unspecified
hsa-mir-21-5p	MIMAT0000076	LDAH	60526	Microarray	18591254	Unspecified
hsa-mir-21-5p	MIMAT0000076	GAS5	60674	qRT-PCR//Western blot	23933812	Unspecified
hsa-mir-21-5p	MIMAT0000076	ZNF667	63934	Microarray	18591254	Unspecified
hsa-mir-21-5p	MIMAT0000076	FAM217B	63939	Microarray	18591254	Unspecified
hsa-mir-21-5p	MIMAT0000076	MOAP1	64112	Microarray	18591254	Unspecified
hsa-mir-21-5p	MIMAT0000076	RRAGC	64121	Microarray	18591254	Unspecified
hsa-mir-21-5p	MIMAT0000076	NCAPG	64151	Luciferase reporter assay//Quantitative proteomic approach	19253296	Unspecified
hsa-mir-21-5p	MIMAT0000076	HERPUD2	64224	Microarray	18591254	Unspecified
hsa-mir-21-5p	MIMAT0000076	LMBR1	64327	Microarray	18591254	Unspecified
hsa-mir-21-5p	MIMAT0000076	MPP5	64398	Microarray	18591254	Unspecified
hsa-mir-21-5p	MIMAT0000076	TNS3	64759	Microarray	18591254	Unspecified
hsa-mir-21-5p	MIMAT0000076	CCDC14	64770	Microarray	18591254	Unspecified
hsa-mir-21-5p	MIMAT0000076	RMND5A	64795	Microarray//qRT-PCR	18591254|22815788	Unspecified
hsa-mir-21-5p	MIMAT0000076	FBXL17	64839	Microarray	18591254	Unspecified
hsa-mir-21-5p	MIMAT0000076	RAPH1	65059	Microarray	18591254	Unspecified
hsa-mir-21-5p	MIMAT0000076	SOWAHC	65124	Microarray	18591254	Unspecified
hsa-mir-21-5p	MIMAT0000076	WNK1	65125	Microarray	18591254	Unspecified
hsa-mir-21-5p	MIMAT0000076	WNK3	65267	Microarray	21544242	Unspecified
hsa-mir-21-5p	MIMAT0000076	MTMR9	66036	Microarray	18591254	Unspecified
hsa-mir-21-5p	MIMAT0000076	GID4	79018	Microarray//PAR-CLIP	18591254|23592263|20371350	Unspecified
hsa-mir-21-5p	MIMAT0000076	DERL1	79139	Luciferase reporter assay//Microarray//Quantitative proteomic approach	19253296|18591254	Unspecified
hsa-mir-21-5p	MIMAT0000076	DCAF10	79269	Microarray	18591254	Unspecified
hsa-mir-21-5p	MIMAT0000076	CEP97	79598	Microarray	18591254	Unspecified
hsa-mir-21-5p	MIMAT0000076	ZYG11B	79699	Microarray	18591254	Unspecified
hsa-mir-21-5p	MIMAT0000076	TBL1XR1	79718	Microarray	18591254	Unspecified
hsa-mir-21-5p	MIMAT0000076	CLIP4	79745	Microarray	18591254	Unspecified
hsa-mir-21-5p	MIMAT0000076	VASH2	79805	Microarray	19253296|19342589	Unspecified
hsa-mir-21-5p	MIMAT0000076	CYBRD1	79901	Microarray	18591254	Unspecified
hsa-mir-21-5p	MIMAT0000076	JADE1	79960	Microarray	18591254	Unspecified
hsa-mir-21-5p	MIMAT0000076	ELOVL7	79993	Microarray	18591254	Unspecified
hsa-mir-21-5p	MIMAT0000076	DOCK5	80005	Immunoblot//Luciferase reporter assay//qRT-PCR	22158624	Unspecified
hsa-mir-21-5p	MIMAT0000076	WWC2	80014	Microarray	19253296|19342589	Unspecified
hsa-mir-21-5p	MIMAT0000076	ASRGL1	80150	Microarray	18591254	Unspecified
hsa-mir-21-5p	MIMAT0000076	FBXO11	80204	Luciferase reporter assay//Microarray	18591254|25589783	Unspecified
hsa-mir-21-5p	MIMAT0000076	SPG11	80208	Microarray	18591254	Unspecified
hsa-mir-21-5p	MIMAT0000076	PROSER1	80209	Microarray	18591254	Unspecified
hsa-mir-21-5p	MIMAT0000076	NAA50	80218	HITS-CLIP	22473208	Unspecified
hsa-mir-21-5p	MIMAT0000076	NUBPL	80224	Microarray	18591254	Unspecified
hsa-mir-21-5p	MIMAT0000076	PDGFD	80310	Microarray	18591254	Unspecified
hsa-mir-21-5p	MIMAT0000076	KLHL15	80311	Microarray//PAR-CLIP	18591254|23446348|20371350	Unspecified
hsa-mir-21-5p	MIMAT0000076	TET1	80312	Microarray	18591254	Unspecified
hsa-mir-21-5p	MIMAT0000076	DCAF11	80344	PAR-CLIP	26701625	Unspecified
hsa-mir-21-5p	MIMAT0000076	LNPK	80856	Microarray	18591254	Unspecified
hsa-mir-21-5p	MIMAT0000076	Smad7	81516	Luciferase reporter assay//qRT-PCR//Western blot	26968995	Unspecified
hsa-mir-21-5p	MIMAT0000076	APOLD1	81575	Microarray	18591254	Unspecified
hsa-mir-21-5p	MIMAT0000076	NETO2	81831	Microarray	18591254	Unspecified
hsa-mir-21-5p	MIMAT0000076	SPRY4	81848	HITS-CLIP	23824327|27418678	Unspecified
hsa-mir-21-5p	MIMAT0000076	PARP9	83666	Microarray	18591254	Unspecified
hsa-mir-21-5p	MIMAT0000076	B3GNT5	84002	Microarray	18591254	Unspecified
hsa-mir-21-5p	MIMAT0000076	KBTBD7	84078	Microarray	18591254	Unspecified
hsa-mir-21-5p	MIMAT0000076	RAB6C	84084	Microarray	18591254	Unspecified
hsa-mir-21-5p	MIMAT0000076	TRAF7	84231	In situ hybridization//Luciferase reporter assay//Northern blot//qRT-PCR//Western blot	26080425	Unspecified
hsa-mir-21-5p	MIMAT0000076	PYM1	84305	Quantitative proteomic approach	19253296	Unspecified
hsa-mir-21-5p	MIMAT0000076	PLEKHA8	84725	HITS-CLIP	23313552	Unspecified
hsa-mir-21-5p	MIMAT0000076	FAM136A	84908	PAR-CLIP	23592263	Unspecified
hsa-mir-21-5p	MIMAT0000076	ZNF587	84914	Microarray	18591254	Unspecified
hsa-mir-21-5p	MIMAT0000076	SERAC1	84947	Microarray	18591254	Unspecified
hsa-mir-21-5p	MIMAT0000076	ZCCHC3	85364	HITS-CLIP	22473208	Unspecified
hsa-mir-21-5p	MIMAT0000076	DOCK7	85440	Immunoblot//Luciferase reporter assay//qRT-PCR	22158624	Unspecified
hsa-mir-21-5p	MIMAT0000076	NAV3	89795	Luciferase reporter assay/Microarray//Western blot	25579119	Unspecified
hsa-mir-21-5p	MIMAT0000076	KBTBD6	89890	Microarray	18591254	Unspecified
hsa-mir-21-5p	MIMAT0000076	RSPRY1	89970	Microarray	18591254	Unspecified
hsa-mir-21-5p	MIMAT0000076	LYRM7	90624	Microarray	18591254	Unspecified
hsa-mir-21-5p	MIMAT0000076	CCDC34	91057	Microarray	18591254	Unspecified
hsa-mir-21-5p	MIMAT0000076	SESTD1	91404	Microarray	18591254	Unspecified
hsa-mir-21-5p	MIMAT0000076	RNF185	91445	PAR-CLIP	23592263|24398324	Unspecified
hsa-mir-21-5p	MIMAT0000076	ACBD5	91452	Microarray//Sequencing	20371350|18591254	Unspecified
hsa-mir-21-5p	MIMAT0000076	BOC	91653	Microarray	18591254	Unspecified
hsa-mir-21-5p	MIMAT0000076	FDXACB1	91893	PAR-CLIP	27292025	Unspecified
hsa-mir-21-5p	MIMAT0000076	ZBTB47	92999	Microarray	18591254	Unspecified
hsa-mir-21-5p	MIMAT0000076	SFXN1	94081	Microarray	18591254	Unspecified
hsa-mir-21-5p	MIMAT0000076	MRAP2	112609	Microarray	18591254	Unspecified
hsa-mir-21-5p	MIMAT0000076	GLCCI1	113263	Microarray//Sequencing	20371350|18591254	Unspecified
hsa-mir-21-5p	MIMAT0000076	TUBGCP5	114791	Microarray	18591254	Unspecified
hsa-mir-21-5p	MIMAT0000076	OSBPL1A	114876	Microarray	18591254	Unspecified
hsa-mir-21-5p	MIMAT0000076	COX20	116228	PAR-CLIP	23446348|22012620|21572407|20371350	Unspecified
hsa-mir-21-5p	MIMAT0000076	SLC16A10	117247	Microarray	18591254	Unspecified
hsa-mir-21-5p	MIMAT0000076	RFFL	117584	Microarray//qRT-PCR	22815788	Unspecified
hsa-mir-21-5p	MIMAT0000076	SPPL3	121665	HITS-CLIP	22473208	Unspecified
hsa-mir-21-5p	MIMAT0000076	SOCS4	122809	Microarray	18591254	Unspecified
hsa-mir-21-5p	MIMAT0000076	NAA30	122830	Microarray	18591254	Unspecified
hsa-mir-21-5p	MIMAT0000076	TMEM170A	124491	PAR-CLIP	21572407	Unspecified
hsa-mir-21-5p	MIMAT0000076	TPRG1L	127262	HITS-CLIP//Microarray	18591254|22473208	Unspecified
hsa-mir-21-5p	MIMAT0000076	TCEANC2	127428	HITS-CLIP//PAR-CLIP	23824327|27292025	Unspecified
hsa-mir-21-5p	MIMAT0000076	OSR1	130497	Microarray	18591254	Unspecified
hsa-mir-21-5p	MIMAT0000076	UBR3	130507	Microarray	18591254	Unspecified
hsa-mir-21-5p	MIMAT0000076	AHSA2	130872	Microarray	18591254	Unspecified
hsa-mir-21-5p	MIMAT0000076	PRRC1	133619	Microarray	18591254	Unspecified
hsa-mir-21-5p	MIMAT0000076	JMY	133746	Luciferase reporter assay//qRT-PCR	18829576	Unspecified
hsa-mir-21-5p	MIMAT0000076	GRPEL2	134266	PAR-CLIP//Sequencing	20371350	Unspecified
hsa-mir-21-5p	MIMAT0000076	STXBP5	134957	Microarray	20048743	Unspecified
hsa-mir-21-5p	MIMAT0000076	PM20D2	135293	Microarray	18591254	Unspecified
hsa-mir-21-5p	MIMAT0000076	MTPN	136319	Microarray	18591254	Unspecified
hsa-mir-21-5p	MIMAT0000076	PTPDC1	138639	Microarray	18591254	Unspecified
hsa-mir-21-5p	MIMAT0000076	SREK1	140890	Microarray	18591254	Unspecified
hsa-mir-21-5p	MIMAT0000076	TMEM56	148534	Microarray	18591254	Unspecified
hsa-mir-21-5p	MIMAT0000076	EXOC8	149371	Microarray	18591254	Unspecified
hsa-mir-21-5p	MIMAT0000076	DTX3L	151636	Microarray	18591254	Unspecified
hsa-mir-21-5p	MIMAT0000076	PPM1L	151742	Sequencing	20371350	Unspecified
hsa-mir-21-5p	MIMAT0000076	SNRNP48	154007	Microarray	18591254	Unspecified
hsa-mir-21-5p	MIMAT0000076	ANKRD46	157567	Immunoblot//Immunohistochemistry//Luciferase reporter assay//Microarray//qRT-PCR//Western blot	21219636	Unspecified
hsa-mir-21-5p	MIMAT0000076	RASEF	158158	Microarray	18591254	Unspecified
hsa-mir-21-5p	MIMAT0000076	TOR1AIP2	163590	Microarray//qRT-PCR	22815788	Unspecified
hsa-mir-21-5p	MIMAT0000076	LONRF2	164832	Microarray	18591254	Unspecified
hsa-mir-21-5p	MIMAT0000076	PRICKLE2	166336	Microarray	18591254	Unspecified
hsa-mir-21-5p	MIMAT0000076	AGO4	192670	Microarray	18591254	Unspecified
hsa-mir-21-5p	MIMAT0000076	ZNF367	195828	HITS-CLIP//Sequencing	20371350|22473208	Unspecified
hsa-mir-21-5p	MIMAT0000076	OTUD1	220213	CLASH	23622248	Unspecified
hsa-mir-21-5p	MIMAT0000076	FBXL13	222235	PAR-CLIP	23446348|22012620	Unspecified
hsa-mir-21-5p	MIMAT0000076	TXLNGY	246126	Microarray	18591254	Unspecified
hsa-mir-21-5p	MIMAT0000076	PRR14L	253143	PAR-CLIP	26701625	Unspecified
hsa-mir-21-5p	MIMAT0000076	ZBTB38	253461	Microarray	18591254	Unspecified
hsa-mir-21-5p	MIMAT0000076	CERS6	253782	Microarray	18591254	Unspecified
hsa-mir-21-5p	MIMAT0000076	LCORL	254251	Microarray	18591254	Unspecified
hsa-mir-21-5p	MIMAT0000076	CASC2	255082	Immunoprecipitaion//Luciferase reporter assay//qRT-PCR//Western blot	25446261	Unspecified
hsa-mir-21-5p	MIMAT0000076	LRRC57	255252	Microarray	18591254	Unspecified
hsa-mir-21-5p	MIMAT0000076	PAN3	255967	Microarray	18591254	Unspecified
hsa-mir-21-5p	MIMAT0000076	GK5	256356	HITS-CLIP	22473208	Unspecified
hsa-mir-21-5p	MIMAT0000076	ZADH2	284273	Microarray	18591254	Unspecified
hsa-mir-21-5p	MIMAT0000076	ZNF326	284695	Microarray	18591254	Unspecified
hsa-mir-21-5p	MIMAT0000076	FAM126B	285172	Microarray	18591254	Unspecified
hsa-mir-21-5p	MIMAT0000076	CYP4V2	285440	Microarray	18591254	Unspecified
hsa-mir-21-5p	MIMAT0000076	TRIM59	286827	Microarray	18591254	Unspecified
hsa-mir-21-5p	MIMAT0000076	TICAM2	353376	Luciferase reporter assay//Western blot	25327529	Unspecified
hsa-mir-21-5p	MIMAT0000076	PTAR1	375743	Microarray	18591254	Unspecified
hsa-mir-21-5p	MIMAT0000076	C15orf52	388115	HITS-CLIP//PAR-CLIP	23592263|23446348|20371350|24906430|21572407|27292025	Unspecified
hsa-mir-21-5p	MIMAT0000076	SAMD5	389432	Microarray	18591254	Unspecified
hsa-mir-21-5p	MIMAT0000076	PATE2	399967	PAR-CLIP	22012620	Unspecified
hsa-mir-21-5p	MIMAT0000076	SNX30	401548	Microarray	18591254	Unspecified
hsa-mir-21-5p	MIMAT0000076	C1orf147	574431	PAR-CLIP	22012620	Unspecified
hsa-mir-21-5p	MIMAT0000076	CCT6P1	643253	Microarray	18591254	Unspecified
hsa-mir-21-5p	MIMAT0000076	ZBTB8A	653121	Microarray	18591254	Unspecified
hsa-mir-21-5p	MIMAT0000076	GXYLT2	727936	Sequencing	20371350	Unspecified
hsa-mir-21-5p	MIMAT0000076	C8orf17	100507249	HITS-CLIP	23313552	Unspecified
hsa-mir-93-5p	MIMAT0000093	ABCA1	19	ELISA//HITS-CLIP//Luciferase reporter assay//qRT-PCR//Western blot	22473208|25785043	Unspecified
hsa-mir-93-5p	MIMAT0000093	ACADSB	36	HITS-CLIP	22473208	Unspecified
hsa-mir-93-5p	MIMAT0000093	ACOX1	51	HITS-CLIP	19536157	Unspecified
hsa-mir-93-5p	MIMAT0000093	ACVR1B	91	PAR-CLIP	23446348|21572407|20371350|26701625	Unspecified
hsa-mir-93-5p	MIMAT0000093	ADAR	103	PAR-CLIP//Sequencing	20371350|23592263|21572407	Unspecified
hsa-mir-93-5p	MIMAT0000093	ADARB1	104	Sequencing	20371350	Unspecified
hsa-mir-93-5p	MIMAT0000093	ADD1	118	HITS-CLIP	22473208	Unspecified
hsa-mir-93-5p	MIMAT0000093	GRK3	157	HITS-CLIP	23824327|27418678	Unspecified
hsa-mir-93-5p	MIMAT0000093	AP2A2	161	CLASH	23622248	Unspecified
hsa-mir-93-5p	MIMAT0000093	AP1G1	164	HITS-CLIP//Sequencing	20371350|22473208	Unspecified
hsa-mir-93-5p	MIMAT0000093	ALDH9A1	223	HITS-CLIP	22473208	Unspecified
hsa-mir-93-5p	MIMAT0000093	ANG	283	Luciferase reporter assay//Western blot	28401709	Unspecified
hsa-mir-93-5p	MIMAT0000093	APBB2	323	CLASH	23622248	Unspecified
hsa-mir-93-5p	MIMAT0000093	XIAP	331	PAR-CLIP	21572407	Unspecified
hsa-mir-93-5p	MIMAT0000093	BIRC5	332	CLASH	23622248	Unspecified
hsa-mir-93-5p	MIMAT0000093	APLP2	334	CLASH	23622248	Unspecified
hsa-mir-93-5p	MIMAT0000093	APOH	350	HITS-CLIP	23824327	Unspecified
hsa-mir-93-5p	MIMAT0000093	ARCN1	372	HITS-CLIP//Sequencing	20371350|22473208	Unspecified
hsa-mir-93-5p	MIMAT0000093	RHOC	389	Luciferase reporter assay//PAR-CLIP	21572407|25649143|26701625	Unspecified
hsa-mir-93-5p	MIMAT0000093	RND3	390	Sequencing	20371350	Unspecified
hsa-mir-93-5p	MIMAT0000093	ARHGAP1	392	HITS-CLIP//PAR-CLIP//Sequencing	20371350|22473208|23592263|21572407	Unspecified
hsa-mir-93-5p	MIMAT0000093	ARL1	400	HITS-CLIP//Sequencing	20371350|22473208	Unspecified
hsa-mir-93-5p	MIMAT0000093	ATP1B3	483	HITS-CLIP	23313552	Unspecified
hsa-mir-93-5p	MIMAT0000093	ATP2B1	490	HITS-CLIP	22473208	Unspecified
hsa-mir-93-5p	MIMAT0000093	ATP5B	506	CLASH	23622248	Unspecified
hsa-mir-93-5p	MIMAT0000093	B2M	567	PAR-CLIP//Sequencing	20371350|23592263|24398324|23446348|21572407	Unspecified
hsa-mir-93-5p	MIMAT0000093	CCND1	595	HITS-CLIP//PAR-CLIP//Sequencing	20371350|23592263|24398324|23446348|22012620|21572407|26701625|27292025	Unspecified
hsa-mir-93-5p	MIMAT0000093	BCL2L2	599	PAR-CLIP	23446348	Unspecified
hsa-mir-93-5p	MIMAT0000093	BMP2	650	PAR-CLIP	23592263	Unspecified
hsa-mir-93-5p	MIMAT0000093	BMP8B	656	PAR-CLIP	23446348|21572407|20371350	Unspecified
hsa-mir-93-5p	MIMAT0000093	BMPR2	659	HITS-CLIP//Sequencing	20371350|22473208	Unspecified
hsa-mir-93-5p	MIMAT0000093	BNIP2	663	HITS-CLIP//PAR-CLIP//Sequencing	20371350|22473208|23446348|21572407	Unspecified
hsa-mir-93-5p	MIMAT0000093	KLF9	687	Sequencing	20371350	Unspecified
hsa-mir-93-5p	MIMAT0000093	CAPZA2	830	HITS-CLIP	23313552|27418678	Unspecified
hsa-mir-93-5p	MIMAT0000093	CASP2	835	HITS-CLIP	22473208	Unspecified
hsa-mir-93-5p	MIMAT0000093	CAV1	857	PAR-CLIP	20371350	Unspecified
hsa-mir-93-5p	MIMAT0000093	CAV2	858	Sequencing	20371350	Unspecified
hsa-mir-93-5p	MIMAT0000093	RUNX3	864	PAR-CLIP//Sequencing	20371350	Unspecified
hsa-mir-93-5p	MIMAT0000093	CCNG2	901	Sequencing	20371350	Unspecified
hsa-mir-93-5p	MIMAT0000093	CD28	940	HITS-CLIP	23313552	Unspecified
hsa-mir-93-5p	MIMAT0000093	CD47	961	HITS-CLIP	22473208	Unspecified
hsa-mir-93-5p	MIMAT0000093	CDKN1A	1026	HITS-CLIP//Luciferase reporter assay//Microarray//qRT-PCR//Western blot	18328430|19153141|20190813|22473208|27185265|28356951	Unspecified
hsa-mir-93-5p	MIMAT0000093	CFL2	1073	HITS-CLIP//PAR-CLIP	22473208|21572407	Unspecified
hsa-mir-93-5p	MIMAT0000093	LYST	1130	Sequencing	20371350	Unspecified
hsa-mir-93-5p	MIMAT0000093	KLF6	1316	PAR-CLIP	23592263	Unspecified
hsa-mir-93-5p	MIMAT0000093	COX6B1	1340	PAR-CLIP	20371350	Unspecified
hsa-mir-93-5p	MIMAT0000093	CPOX	1371	HITS-CLIP	22473208	Unspecified
hsa-mir-93-5p	MIMAT0000093	CPS1	1373	HITS-CLIP	23313552	Unspecified
hsa-mir-93-5p	MIMAT0000093	CPT1A	1374	HITS-CLIP	23313552	Unspecified
hsa-mir-93-5p	MIMAT0000093	CREB1	1385	PAR-CLIP	23446348	Unspecified
hsa-mir-93-5p	MIMAT0000093	CRK	1398	HITS-CLIP//PAR-CLIP	22473208|20371350	Unspecified
hsa-mir-93-5p	MIMAT0000093	CRY2	1408	HITS-CLIP//Sequencing	20371350|22473208	Unspecified
hsa-mir-93-5p	MIMAT0000093	CSNK1A1	1452	PAR-CLIP	23592263|20371350	Unspecified
hsa-mir-93-5p	MIMAT0000093	CTSS	1520	HITS-CLIP	22473208	Unspecified
hsa-mir-93-5p	MIMAT0000093	CYB5A	1528	HITS-CLIP	23824327	Unspecified
hsa-mir-93-5p	MIMAT0000093	CYLD	1540	HITS-CLIP	22473208	Unspecified
hsa-mir-93-5p	MIMAT0000093	DAB2	1601	colony formation//Flow//Luciferase reporter assay//Microarray//qRT-PCR//Western blot	24037530|25892549	Unspecified
hsa-mir-93-5p	MIMAT0000093	DAPK3	1613	CLASH	23622248	Unspecified
hsa-mir-93-5p	MIMAT0000093	DCTN1	1639	CLASH	23622248	Unspecified
hsa-mir-93-5p	MIMAT0000093	DDX5	1655	HITS-CLIP//Sequencing	20371350|22473208	Unspecified
hsa-mir-93-5p	MIMAT0000093	DHODH	1723	HITS-CLIP	23824327|23313552	Unspecified
hsa-mir-93-5p	MIMAT0000093	DYNC1LI2	1783	HITS-CLIP//PAR-CLIP	22473208|21572407	Unspecified
hsa-mir-93-5p	MIMAT0000093	DNMT3B	1789	CLASH	23622248	Unspecified
hsa-mir-93-5p	MIMAT0000093	DPYSL2	1808	PAR-CLIP	22012620	Unspecified
hsa-mir-93-5p	MIMAT0000093	DSPP	1834	PAR-CLIP	20371350	Unspecified
hsa-mir-93-5p	MIMAT0000093	DUSP2	1844	PAR-CLIP	23592263|22012620	Unspecified
hsa-mir-93-5p	MIMAT0000093	DUSP8	1850	Sequencing	20371350	Unspecified
hsa-mir-93-5p	MIMAT0000093	DVL3	1857	CLASH	23622248	Unspecified
hsa-mir-93-5p	MIMAT0000093	E2F1	1869	HITS-CLIP//Luciferase reporter assay//Microarray//Sequencing//Western blot	19486339|18328430|20371350|22473208	Unspecified
hsa-mir-93-5p	MIMAT0000093	E2F2	1870	HITS-CLIP	22473208	Unspecified
hsa-mir-93-5p	MIMAT0000093	E2F3	1871	HITS-CLIP	22473208	Unspecified
hsa-mir-93-5p	MIMAT0000093	E2F5	1875	HITS-CLIP	22473208	Unspecified
hsa-mir-93-5p	MIMAT0000093	GPR183	1880	PAR-CLIP	26701625	Unspecified
hsa-mir-93-5p	MIMAT0000093	EEF1A1	1915	CLASH	23622248	Unspecified
hsa-mir-93-5p	MIMAT0000093	EGR2	1959	Sequencing	20371350	Unspecified
hsa-mir-93-5p	MIMAT0000093	EIF2S1	1965	HITS-CLIP//PAR-CLIP	21572407|23824327	Unspecified
hsa-mir-93-5p	MIMAT0000093	EIF4A2	1974	PAR-CLIP	20371350	Unspecified
hsa-mir-93-5p	MIMAT0000093	EIF4G2	1982	CLASH//HITS-CLIP	23622248|22473208	Unspecified
hsa-mir-93-5p	MIMAT0000093	ELAVL2	1993	PAR-CLIP	22012620	Unspecified
hsa-mir-93-5p	MIMAT0000093	ELAVL1	1994	CLASH	23622248	Unspecified
hsa-mir-93-5p	MIMAT0000093	ELK4	2005	PAR-CLIP	23446348|20371350	Unspecified
hsa-mir-93-5p	MIMAT0000093	MARK2	2011	CLASH	23622248	Unspecified
hsa-mir-93-5p	MIMAT0000093	EPHA4	2043	CLASH//PAR-CLIP//Sequencing	20371350|23622248|21572407	Unspecified
hsa-mir-93-5p	MIMAT0000093	EPHA7	2045	Sequencing	20371350	Unspecified
hsa-mir-93-5p	MIMAT0000093	CLN8	2055	CLASH	23622248	Unspecified
hsa-mir-93-5p	MIMAT0000093	NR2F6	2063	PAR-CLIP	23446348|21572407	Unspecified
hsa-mir-93-5p	MIMAT0000093	EREG	2069	Microarray//PAR-CLIP//qRT-PCR	22815788|26701625	Unspecified
hsa-mir-93-5p	MIMAT0000093	ESR2	2100	HITS-CLIP	23313552	Unspecified
hsa-mir-93-5p	MIMAT0000093	ETF1	2107	HITS-CLIP	22473208	Unspecified
hsa-mir-93-5p	MIMAT0000093	EZH1	2145	HITS-CLIP//Sequencing	20371350|22473208	Unspecified
hsa-mir-93-5p	MIMAT0000093	EZH2	2146	CLASH	23622248	Unspecified
hsa-mir-93-5p	MIMAT0000093	F2R	2149	PAR-CLIP	20371350	Unspecified
hsa-mir-93-5p	MIMAT0000093	F2RL1	2150	HITS-CLIP	23313552	Unspecified
hsa-mir-93-5p	MIMAT0000093	F3	2152	PAR-CLIP//Sequencing	20371350|23592263|23446348|21572407|26701625	Unspecified
hsa-mir-93-5p	MIMAT0000093	ACSL4	2182	HITS-CLIP//PAR-CLIP	21572407	Unspecified
hsa-mir-93-5p	MIMAT0000093	FAH	2184	CLASH	23622248	Unspecified
hsa-mir-93-5p	MIMAT0000093	FASN	2194	CLASH	23622248	Unspecified
hsa-mir-93-5p	MIMAT0000093	FOXC1	2296	PAR-CLIP	21572407	Unspecified
hsa-mir-93-5p	MIMAT0000093	FOXO3	2309	Luciferase reporter assay	25823655	Unspecified
hsa-mir-93-5p	MIMAT0000093	GAB1	2549	HITS-CLIP	22473208	Unspecified
hsa-mir-93-5p	MIMAT0000093	GABBR1	2550	HITS-CLIP	22473208	Unspecified
hsa-mir-93-5p	MIMAT0000093	GABPB1	2553	HITS-CLIP//PAR-CLIP	22473208|23446348	Unspecified
hsa-mir-93-5p	MIMAT0000093	GAK	2580	HITS-CLIP	22473208	Unspecified
hsa-mir-93-5p	MIMAT0000093	GAPDH	2597	CLASH	23622248	Unspecified
hsa-mir-93-5p	MIMAT0000093	GARS	2617	CLASH	23622248	Unspecified
hsa-mir-93-5p	MIMAT0000093	GATA6	2627	PAR-CLIP	24398324|23446348|21572407|20371350	Unspecified
hsa-mir-93-5p	MIMAT0000093	GBP3	2635	HITS-CLIP	22473208	Unspecified
hsa-mir-93-5p	MIMAT0000093	GLI3	2737	CLASH	23622248	Unspecified
hsa-mir-93-5p	MIMAT0000093	GLO1	2739	HITS-CLIP//PAR-CLIP	22473208|21572407	Unspecified
hsa-mir-93-5p	MIMAT0000093	GNA12	2768	Sequencing	20371350	Unspecified
hsa-mir-93-5p	MIMAT0000093	GNAS	2778	HITS-CLIP	22473208	Unspecified
hsa-mir-93-5p	MIMAT0000093	GNS	2799	HITS-CLIP//PAR-CLIP	22473208|23592263|21572407|20371350	Unspecified
hsa-mir-93-5p	MIMAT0000093	GOLGA1	2800	HITS-CLIP	22473208	Unspecified
hsa-mir-93-5p	MIMAT0000093	GOLGA2	2801	HITS-CLIP	19536157	Unspecified
hsa-mir-93-5p	MIMAT0000093	MKNK2	2872	HITS-CLIP//PAR-CLIP	22473208|23592263|22012620|20371350	Unspecified
hsa-mir-93-5p	MIMAT0000093	GPS1	2873	CLASH	23622248	Unspecified
hsa-mir-93-5p	MIMAT0000093	GRB2	2885	Sequencing	20371350	Unspecified
hsa-mir-93-5p	MIMAT0000093	NR3C1	2908	PAR-CLIP	27292025	Unspecified
hsa-mir-93-5p	MIMAT0000093	ARHGAP35	2909	HITS-CLIP	22473208	Unspecified
hsa-mir-93-5p	MIMAT0000093	GRSF1	2926	CLASH	23622248	Unspecified
hsa-mir-93-5p	MIMAT0000093	GTF2H3	2967	HITS-CLIP	23313552	Unspecified
hsa-mir-93-5p	MIMAT0000093	H1F0	3005	CLASH	23622248	Unspecified
hsa-mir-93-5p	MIMAT0000093	HIST1H2BD	3017	PAR-CLIP	21572407	Unspecified
hsa-mir-93-5p	MIMAT0000093	HARS	3035	Sequencing	20371350	Unspecified
hsa-mir-93-5p	MIMAT0000093	HAS2	3037	HITS-CLIP	22927820	Unspecified
hsa-mir-93-5p	MIMAT0000093	HCCS	3052	Sequencing	20371350	Unspecified
hsa-mir-93-5p	MIMAT0000093	HDGF	3068	CLASH	23622248	Unspecified
hsa-mir-93-5p	MIMAT0000093	HIF1A	3091	Flow//HITS-CLIP//Immunocytochemistry//Microarray//Next Generation Sequencing (NGS)//qRT-PCR	22473208|22815788|26815014	Unspecified
hsa-mir-93-5p	MIMAT0000093	HIP1	3092	HITS-CLIP	23824327	Unspecified
hsa-mir-93-5p	MIMAT0000093	HK1	3098	CLASH	23622248	Unspecified
hsa-mir-93-5p	MIMAT0000093	HLA-F	3134	qRT-PCR	24367666	Unspecified
hsa-mir-93-5p	MIMAT0000093	HMGB1	3146	HITS-CLIP//PAR-CLIP	23446348|21572407|23313552	Unspecified
hsa-mir-93-5p	MIMAT0000093	HMGB2	3148	PAR-CLIP	20371350	Unspecified
hsa-mir-93-5p	MIMAT0000093	HMGB3	3149	PAR-CLIP	23592263|23446348|21572407	Unspecified
hsa-mir-93-5p	MIMAT0000093	NR4A1	3164	CLASH	23622248	Unspecified
hsa-mir-93-5p	MIMAT0000093	FOXA1	3169	Luciferase reporter assay//qRT-PCR//Western blot	27829043	Unspecified
hsa-mir-93-5p	MIMAT0000093	SLC29A2	3177	CLASH	23622248	Unspecified
hsa-mir-93-5p	MIMAT0000093	HOXD11	3237	PAR-CLIP	21572407	Unspecified
hsa-mir-93-5p	MIMAT0000093	HPS1	3257	CLASH	23622248	Unspecified
hsa-mir-93-5p	MIMAT0000093	AGFG2	3268	HITS-CLIP	22473208	Unspecified
hsa-mir-93-5p	MIMAT0000093	HSPA8	3312	PAR-CLIP	23592263|23446348|20371350|26701625	Unspecified
hsa-mir-93-5p	MIMAT0000093	ICAM1	3383	qRT-PCR	24367666	Unspecified
hsa-mir-93-5p	MIMAT0000093	ICAM4	3386	CLASH	23622248	Unspecified
hsa-mir-93-5p	MIMAT0000093	IFNAR1	3454	HITS-CLIP	22473208	Unspecified
hsa-mir-93-5p	MIMAT0000093	IFNAR2	3455	HITS-CLIP	22473208	Unspecified
hsa-mir-93-5p	MIMAT0000093	IGF2	3481	CLASH	23622248	Unspecified
hsa-mir-93-5p	MIMAT0000093	CXCL8	3576	Luciferase reporter assay//qRT-PCR	24433094	Unspecified
hsa-mir-93-5p	MIMAT0000093	FOXK2	3607	HITS-CLIP//PAR-CLIP	22473208|23446348|21572407	Unspecified
hsa-mir-93-5p	MIMAT0000093	IPP	3652	HITS-CLIP	23313552	Unspecified
hsa-mir-93-5p	MIMAT0000093	IRF1	3659	Sequencing	20371350	Unspecified
hsa-mir-93-5p	MIMAT0000093	ITGA2	3673	PAR-CLIP	22100165	Unspecified
hsa-mir-93-5p	MIMAT0000093	ITGB1	3688	PAR-CLIP	20371350	Unspecified
hsa-mir-93-5p	MIMAT0000093	ITGB8	3696	Luciferase reporter assay//qRT-PCR//Western blot	20956944	Unspecified
hsa-mir-93-5p	MIMAT0000093	ITPA	3704	CLASH	23622248	Unspecified
hsa-mir-93-5p	MIMAT0000093	ITPKB	3707	HITS-CLIP	22473208	Unspecified
hsa-mir-93-5p	MIMAT0000093	JAK1	3716	HITS-CLIP	22473208	Unspecified
hsa-mir-93-5p	MIMAT0000093	JUN	3725	CLASH	23622248	Unspecified
hsa-mir-93-5p	MIMAT0000093	KCNA7	3743	PAR-CLIP	23446348|21572407	Unspecified
hsa-mir-93-5p	MIMAT0000093	KCNB1	3745	PAR-CLIP	20371350	Unspecified
hsa-mir-93-5p	MIMAT0000093	KCND3	3752	HITS-CLIP	23313552	Unspecified
hsa-mir-93-5p	MIMAT0000093	KCNJ8	3764	PAR-CLIP	22012620	Unspecified
hsa-mir-93-5p	MIMAT0000093	KCNMB1	3779	PAR-CLIP	23446348	Unspecified
hsa-mir-93-5p	MIMAT0000093	KLRD1	3824	HITS-CLIP	19536157	Unspecified
hsa-mir-93-5p	MIMAT0000093	KPNA2	3838	CLASH//HITS-CLIP//PAR-CLIP	23622248|22473208|23592263|24398324|22012620|21572407|20371350|27292025	Unspecified
hsa-mir-93-5p	MIMAT0000093	IPO5	3843	CLASH	23622248	Unspecified
hsa-mir-93-5p	MIMAT0000093	KRT10	3858	PAR-CLIP	23592263|23446348|21572407|20371350|27292025	Unspecified
hsa-mir-93-5p	MIMAT0000093	LAMC1	3915	HITS-CLIP	22473208	Unspecified
hsa-mir-93-5p	MIMAT0000093	LASP1	3927	HITS-CLIP//PAR-CLIP	22473208|23592263|26701625	Unspecified
hsa-mir-93-5p	MIMAT0000093	LDLR	3949	HITS-CLIP//PAR-CLIP//Sequencing	20371350|22473208|23592263|22012620|21572407	Unspecified
hsa-mir-93-5p	MIMAT0000093	LIMK1	3984	PAR-CLIP	27292025	Unspecified
hsa-mir-93-5p	MIMAT0000093	LOXL1	4016	CLASH	23622248	Unspecified
hsa-mir-93-5p	MIMAT0000093	LRP3	4037	CLASH	23622248	Unspecified
hsa-mir-93-5p	MIMAT0000093	LRPAP1	4043	PAR-CLIP	20371350	Unspecified
hsa-mir-93-5p	MIMAT0000093	M6PR	4074	HITS-CLIP//PAR-CLIP	22473208|23592263|23446348|21572407|20371350	Unspecified
hsa-mir-93-5p	MIMAT0000093	MXD1	4084	Microarray//qRT-PCR	22815788	Unspecified
hsa-mir-93-5p	MIMAT0000093	MAD2L1	4085	CLASH	23622248	Unspecified
hsa-mir-93-5p	MIMAT0000093	SMAD4	4089	PAR-CLIP//Sequencing	20371350|23446348|21572407	Unspecified
hsa-mir-93-5p	MIMAT0000093	SMAD5	4090	HITS-CLIP	22473208	Unspecified
hsa-mir-93-5p	MIMAT0000093	SMAD6	4091	HITS-CLIP	22473208	Unspecified
hsa-mir-93-5p	MIMAT0000093	SMAD7	4092	Luciferase reporter assay//qRT-PCR//Western blot	22286770	Unspecified
hsa-mir-93-5p	MIMAT0000093	MCC	4163	PAR-CLIP	21572407	Unspecified
hsa-mir-93-5p	MIMAT0000093	MCL1	4170	HITS-CLIP	22473208	Unspecified
hsa-mir-93-5p	MIMAT0000093	MCM5	4174	CLASH	23622248	Unspecified
hsa-mir-93-5p	MIMAT0000093	CD46	4179	Sequencing	20371350	Unspecified
hsa-mir-93-5p	MIMAT0000093	DNAJB9	4189	PAR-CLIP	24398324|23446348|22012620|21572407|20371350|26701625|27292025	Unspecified
hsa-mir-93-5p	MIMAT0000093	MDM2	4193	PAR-CLIP	23446348|20371350	Unspecified
hsa-mir-93-5p	MIMAT0000093	MECP2	4204	HITS-CLIP//PAR-CLIP	22473208|21572407	Unspecified
hsa-mir-93-5p	MIMAT0000093	MAP3K3	4215	HITS-CLIP	22473208	Unspecified
hsa-mir-93-5p	MIMAT0000093	MAP3K4	4216	CLASH	23622248	Unspecified
hsa-mir-93-5p	MIMAT0000093	MICB	4277	HITS-CLIP	22473208	Unspecified
hsa-mir-93-5p	MIMAT0000093	MLLT1	4298	PAR-CLIP	23592263	Unspecified
hsa-mir-93-5p	MIMAT0000093	AFF1	4299	HITS-CLIP	22473208	Unspecified
hsa-mir-93-5p	MIMAT0000093	MLLT6	4302	Sequencing	20371350	Unspecified
hsa-mir-93-5p	MIMAT0000093	MMP3	4314	Luciferase reporter assay//qRT-PCR//Western blot	26175939	Unspecified
hsa-mir-93-5p	MIMAT0000093	MPG	4350	CLASH	23622248	Unspecified
hsa-mir-93-5p	MIMAT0000093	MSH3	4437	HITS-CLIP	23313552	Unspecified
hsa-mir-93-5p	MIMAT0000093	ATP6	4508	CLASH	23622248	Unspecified
hsa-mir-93-5p	MIMAT0000093	MTF1	4520	HITS-CLIP	22473208	Unspecified
hsa-mir-93-5p	MIMAT0000093	MYO1F	4542	HITS-CLIP	23313552	Unspecified
hsa-mir-93-5p	MIMAT0000093	TRIM37	4591	PAR-CLIP	24398324	Unspecified
hsa-mir-93-5p	MIMAT0000093	MXI1	4601	HITS-CLIP	22473208	Unspecified
hsa-mir-93-5p	MIMAT0000093	MYC	4609	qRT-PCR	24367666|24955218	Unspecified
hsa-mir-93-5p	MIMAT0000093	MYH9	4627	HITS-CLIP	24906430	Unspecified
hsa-mir-93-5p	MIMAT0000093	MYO1D	4642	PAR-CLIP	23592263	Unspecified
hsa-mir-93-5p	MIMAT0000093	MYO1E	4643	Sequencing	20371350	Unspecified
hsa-mir-93-5p	MIMAT0000093	MYO9B	4650	CLASH	23622248	Unspecified
hsa-mir-93-5p	MIMAT0000093	PPP1R12B	4660	HITS-CLIP	22473208	Unspecified
hsa-mir-93-5p	MIMAT0000093	HNRNPM	4670	CLASH	23622248	Unspecified
hsa-mir-93-5p	MIMAT0000093	NARS	4677	PAR-CLIP	23446348|21572407|20371350	Unspecified
hsa-mir-93-5p	MIMAT0000093	NBL1	4681	PAR-CLIP	26701625	Unspecified
hsa-mir-93-5p	MIMAT0000093	NUBP1	4682	CLASH	23622248	Unspecified
hsa-mir-93-5p	MIMAT0000093	SEPT2	4735	HITS-CLIP//PAR-CLIP	22473208|23446348|20371350	Unspecified
hsa-mir-93-5p	MIMAT0000093	NFIB	4781	PAR-CLIP//Sequencing	20371350|23592263|21572407	Unspecified
hsa-mir-93-5p	MIMAT0000093	NFKBIA	4792	Microarray//qRT-PCR	28057018	Unspecified
hsa-mir-93-5p	MIMAT0000093	NONO	4841	CLASH	23622248	Unspecified
hsa-mir-93-5p	MIMAT0000093	CNOT4	4850	PAR-CLIP//Sequencing	20371350|23592263|21572407	Unspecified
hsa-mir-93-5p	MIMAT0000093	NPAS2	4862	Microarray//qRT-PCR	22815788	Unspecified
hsa-mir-93-5p	MIMAT0000093	NPAT	4863	HITS-CLIP//PAR-CLIP	22473208|23592263	Unspecified
hsa-mir-93-5p	MIMAT0000093	NPM1	4869	CLASH	23622248	Unspecified
hsa-mir-93-5p	MIMAT0000093	NTHL1	4913	CLASH	23622248	Unspecified
hsa-mir-93-5p	MIMAT0000093	NUP98	4928	HITS-CLIP	22473208	Unspecified
hsa-mir-93-5p	MIMAT0000093	OCRL	4952	HITS-CLIP	22473208	Unspecified
hsa-mir-93-5p	MIMAT0000093	PAFAH1B1	5048	HITS-CLIP	22473208	Unspecified
hsa-mir-93-5p	MIMAT0000093	PBX3	5090	Sequencing	20371350	Unspecified
hsa-mir-93-5p	MIMAT0000093	PCBP2	5094	PAR-CLIP	23446348|20371350	Unspecified
hsa-mir-93-5p	MIMAT0000093	PDE3B	5140	Sequencing	20371350	Unspecified
hsa-mir-93-5p	MIMAT0000093	PDE4C	5143	HITS-CLIP	23313552	Unspecified
hsa-mir-93-5p	MIMAT0000093	PDGFB	5155	PAR-CLIP	23592263	Unspecified
hsa-mir-93-5p	MIMAT0000093	PDHB	5162	HITS-CLIP	23313552	Unspecified
hsa-mir-93-5p	MIMAT0000093	PDPK1	5170	PAR-CLIP	23446348	Unspecified
hsa-mir-93-5p	MIMAT0000093	PFAS	5198	CLASH	23622248	Unspecified
hsa-mir-93-5p	MIMAT0000093	PFKFB2	5208	PAR-CLIP	22100165	Unspecified
hsa-mir-93-5p	MIMAT0000093	PFKP	5214	HITS-CLIP//PAR-CLIP	22473208|23446348|22012620|21572407|20371350	Unspecified
hsa-mir-93-5p	MIMAT0000093	PGAM1	5223	CLASH	23622248	Unspecified
hsa-mir-93-5p	MIMAT0000093	PIK3R2	5296	CLASH	23622248	Unspecified
hsa-mir-93-5p	MIMAT0000093	PI4KA	5297	CLASH	23622248	Unspecified
hsa-mir-93-5p	MIMAT0000093	PIP4K2A	5305	HITS-CLIP	22473208	Unspecified
hsa-mir-93-5p	MIMAT0000093	PITPNA	5306	PAR-CLIP	23592263	Unspecified
hsa-mir-93-5p	MIMAT0000093	PKD2	5311	Sequencing	20371350	Unspecified
hsa-mir-93-5p	MIMAT0000093	PKNOX1	5316	PAR-CLIP	23446348|27292025	Unspecified
hsa-mir-93-5p	MIMAT0000093	PLAGL2	5326	HITS-CLIP	22473208	Unspecified
hsa-mir-93-5p	MIMAT0000093	PLRG1	5356	PAR-CLIP	21572407	Unspecified
hsa-mir-93-5p	MIMAT0000093	PLS1	5357	PAR-CLIP	21572407	Unspecified
hsa-mir-93-5p	MIMAT0000093	PLXNA1	5361	HITS-CLIP	22473208	Unspecified
hsa-mir-93-5p	MIMAT0000093	PMAIP1	5366	PAR-CLIP	27292025	Unspecified
hsa-mir-93-5p	MIMAT0000093	POLE	5426	CLASH	23622248	Unspecified
hsa-mir-93-5p	MIMAT0000093	POLR2A	5430	CLASH	23622248	Unspecified
hsa-mir-93-5p	MIMAT0000093	PPP3R1	5534	HITS-CLIP	22473208	Unspecified
hsa-mir-93-5p	MIMAT0000093	PPP6C	5537	HITS-CLIP	22473208	Unspecified
hsa-mir-93-5p	MIMAT0000093	PRIM1	5557	HITS-CLIP//PAR-CLIP	23446348|23313552	Unspecified
hsa-mir-93-5p	MIMAT0000093	PRKACB	5567	PAR-CLIP//Sequencing	20371350|21572407	Unspecified
hsa-mir-93-5p	MIMAT0000093	PRKAR1A	5573	PAR-CLIP	22012620	Unspecified
hsa-mir-93-5p	MIMAT0000093	PRKCB	5579	HITS-CLIP	24906430|27418678	Unspecified
hsa-mir-93-5p	MIMAT0000093	PRKCI	5584	CLASH	23622248	Unspecified
hsa-mir-93-5p	MIMAT0000093	MAPK1	5594	HITS-CLIP//PAR-CLIP	22473208|23446348|21572407	Unspecified
hsa-mir-93-5p	MIMAT0000093	MAPK9	5601	Luciferase reporter assay	20065103	Unspecified
hsa-mir-93-5p	MIMAT0000093	PRNP	5621	HITS-CLIP//PAR-CLIP	22473208|22100165	Unspecified
hsa-mir-93-5p	MIMAT0000093	PRRG1	5638	Sequencing	20371350	Unspecified
hsa-mir-93-5p	MIMAT0000093	PSMD4	5710	CLASH	23622248	Unspecified
hsa-mir-93-5p	MIMAT0000093	PSMD11	5717	CLASH	23622248	Unspecified
hsa-mir-93-5p	MIMAT0000093	PTEN	5728	GFP reporter assay//HITS-CLIP//Luciferase reporter assay//qRT-PCR//Western blot	22465665|22473208|27119510|26087719|25823655	Unspecified
hsa-mir-93-5p	MIMAT0000093	PTGER4	5734	HITS-CLIP	22473208	Unspecified
hsa-mir-93-5p	MIMAT0000093	PTGFRN	5738	PAR-CLIP	23592263	Unspecified
hsa-mir-93-5p	MIMAT0000093	PTGIS	5740	HITS-CLIP	23313552	Unspecified
hsa-mir-93-5p	MIMAT0000093	TWF1	5756	HITS-CLIP	22473208	Unspecified
hsa-mir-93-5p	MIMAT0000093	QSOX1	5768	HITS-CLIP//PAR-CLIP	23446348|23313552	Unspecified
hsa-mir-93-5p	MIMAT0000093	PTPN4	5775	HITS-CLIP//PAR-CLIP//Sequencing	20371350|22473208|24398324|23446348|21572407|26701625	Unspecified
hsa-mir-93-5p	MIMAT0000093	PURA	5813	Luciferase reporter assay	22835829	Unspecified
hsa-mir-93-5p	MIMAT0000093	PURB	5814	HITS-CLIP	22473208|23313552	Unspecified
hsa-mir-93-5p	MIMAT0000093	PVR	5817	PAR-CLIP	21572407|20371350	Unspecified
hsa-mir-93-5p	MIMAT0000093	PYGL	5836	CLASH	23622248	Unspecified
hsa-mir-93-5p	MIMAT0000093	RAB5B	5869	HITS-CLIP//PAR-CLIP//Sequencing	20371350|22473208|23592263|23446348|21572407|27292025	Unspecified
hsa-mir-93-5p	MIMAT0000093	RAN	5901	HITS-CLIP//PAR-CLIP	22473208|23446348|22012620|21572407|20371350|27292025	Unspecified
hsa-mir-93-5p	MIMAT0000093	RANGAP1	5905	HITS-CLIP	23824327|28735896	Unspecified
hsa-mir-93-5p	MIMAT0000093	RB1	5925	PAR-CLIP//Sequencing	20371350|21572407	Unspecified
hsa-mir-93-5p	MIMAT0000093	RBBP7	5931	HITS-CLIP//Sequencing	20371350|22473208	Unspecified
hsa-mir-93-5p	MIMAT0000093	UPF1	5976	CLASH	23622248	Unspecified
hsa-mir-93-5p	MIMAT0000093	REST	5978	PAR-CLIP	23446348	Unspecified
hsa-mir-93-5p	MIMAT0000093	REV3L	5980	Sequencing	20371350	Unspecified
hsa-mir-93-5p	MIMAT0000093	RFC3	5983	CLASH	23622248	Unspecified
hsa-mir-93-5p	MIMAT0000093	RFXAP	5994	HITS-CLIP	19536157	Unspecified
hsa-mir-93-5p	MIMAT0000093	RORA	6095	PAR-CLIP	21572407|20371350	Unspecified
hsa-mir-93-5p	MIMAT0000093	RPA2	6118	HITS-CLIP//Sequencing	20371350|22473208	Unspecified
hsa-mir-93-5p	MIMAT0000093	RPL7A	6130	CLASH	23622248	Unspecified
hsa-mir-93-5p	MIMAT0000093	RPL9	6133	CLASH	23622248	Unspecified
hsa-mir-93-5p	MIMAT0000093	RPL17	6139	HITS-CLIP	22473208	Unspecified
hsa-mir-93-5p	MIMAT0000093	RPL27	6155	CLASH	23622248	Unspecified
hsa-mir-93-5p	MIMAT0000093	RPL30	6156	CLASH	23622248	Unspecified
hsa-mir-93-5p	MIMAT0000093	RPS27A	6233	HITS-CLIP//PAR-CLIP	23592263|24398324|23446348|22012620|21572407|20371350	Unspecified
hsa-mir-93-5p	MIMAT0000093	RRM2	6241	HITS-CLIP//PAR-CLIP	22473208|23592263	Unspecified
hsa-mir-93-5p	MIMAT0000093	RTN2	6253	HITS-CLIP	23313552	Unspecified
hsa-mir-93-5p	MIMAT0000093	MSMO1	6307	HITS-CLIP//Microarray//PAR-CLIP//qRT-PCR	22473208|21572407|22815788	Unspecified
hsa-mir-93-5p	MIMAT0000093	ATXN1	6310	HITS-CLIP//PAR-CLIP//Sequencing	20371350|22473208|21572407	Unspecified
hsa-mir-93-5p	MIMAT0000093	SCD	6319	PAR-CLIP	21572407	Unspecified
hsa-mir-93-5p	MIMAT0000093	CCL1	6346	HITS-CLIP	22473208	Unspecified
hsa-mir-93-5p	MIMAT0000093	CCL5	6352	HITS-CLIP	23313552	Unspecified
hsa-mir-93-5p	MIMAT0000093	TRAPPC2	6399	PAR-CLIP	21572407	Unspecified
hsa-mir-93-5p	MIMAT0000093	SET	6418	CLASH	23622248	Unspecified
hsa-mir-93-5p	MIMAT0000093	SRSF2	6427	HITS-CLIP//PAR-CLIP//Sequencing	20371350|22473208|23446348	Unspecified
hsa-mir-93-5p	MIMAT0000093	SKI	6497	HITS-CLIP	22473208	Unspecified
hsa-mir-93-5p	MIMAT0000093	SKIL	6498	PAR-CLIP	24398324|23446348|22012620|21572407|20371350	Unspecified
hsa-mir-93-5p	MIMAT0000093	SLC1A5	6510	HITS-CLIP	23313552	Unspecified
hsa-mir-93-5p	MIMAT0000093	SLC2A4	6517	Luciferase reporter assay//qRT-PCR//Western blot	23493574	Unspecified
hsa-mir-93-5p	MIMAT0000093	SLC5A3	6526	PAR-CLIP//Sequencing	20371350|21572407	Unspecified
hsa-mir-93-5p	MIMAT0000093	SLC6A4	6532	HITS-CLIP	23313552	Unspecified
hsa-mir-93-5p	MIMAT0000093	SLC19A1	6573	CLASH	23622248	Unspecified
hsa-mir-93-5p	MIMAT0000093	SNTB2	6645	HITS-CLIP	22473208	Unspecified
hsa-mir-93-5p	MIMAT0000093	SOD2	6648	HITS-CLIP//PAR-CLIP	22473208|22012620	Unspecified
hsa-mir-93-5p	MIMAT0000093	CAPN15	6650	PAR-CLIP	23592263	Unspecified
hsa-mir-93-5p	MIMAT0000093	SON	6651	HITS-CLIP	27418678	Unspecified
hsa-mir-93-5p	MIMAT0000093	SOX4	6659	PAR-CLIP	23592263|24398324|23446348|21572407|20371350	Unspecified
hsa-mir-93-5p	MIMAT0000093	SP2	6668	HITS-CLIP	27418678	Unspecified
hsa-mir-93-5p	MIMAT0000093	SP4	6671	PAR-CLIP	23446348|21572407|20371350	Unspecified
hsa-mir-93-5p	MIMAT0000093	SPIB	6689	HITS-CLIP	23824327|28735896	Unspecified
hsa-mir-93-5p	MIMAT0000093	SPTBN1	6711	Sequencing	20371350	Unspecified
hsa-mir-93-5p	MIMAT0000093	SRPK1	6732	Sequencing	20371350	Unspecified
hsa-mir-93-5p	MIMAT0000093	STAT3	6774	HITS-CLIP//Sequencing	20371350|22473208	Unspecified
hsa-mir-93-5p	MIMAT0000093	STK11	6794	Luciferase reporter assay//Sequencing	20371350|28382150	Unspecified
hsa-mir-93-5p	MIMAT0000093	STX4	6810	HITS-CLIP	23313552	Unspecified
hsa-mir-93-5p	MIMAT0000093	STYX	6815	Sequencing	20371350	Unspecified
hsa-mir-93-5p	MIMAT0000093	VAMP7	6845	CLASH	23622248	Unspecified
hsa-mir-93-5p	MIMAT0000093	TAF4	6874	CLASH	23622248	Unspecified
hsa-mir-93-5p	MIMAT0000093	TAF6	6878	Sequencing	20371350	Unspecified
hsa-mir-93-5p	MIMAT0000093	TBCC	6903	CLASH	23622248	Unspecified
hsa-mir-93-5p	MIMAT0000093	ELOC	6921	HITS-CLIP	23824327	Unspecified
hsa-mir-93-5p	MIMAT0000093	TCF4	6925	HITS-CLIP	22473208	Unspecified
hsa-mir-93-5p	MIMAT0000093	TCF7L2	6934	PAR-CLIP	21572407	Unspecified
hsa-mir-93-5p	MIMAT0000093	TMBIM6	7009	HITS-CLIP	22473208	Unspecified
hsa-mir-93-5p	MIMAT0000093	TFAM	7019	HITS-CLIP//PAR-CLIP	23592263|23446348|20371350|21572407	Unspecified
hsa-mir-93-5p	MIMAT0000093	TGFB1	7040	qRT-PCR	24367666	Unspecified
hsa-mir-93-5p	MIMAT0000093	TGFBR2	7048	ELISA//HITS-CLIP//Immunohistochemistry//Luciferase reporter assay//Microarray//PAR-CLIP//qRT-PCR//Sequencing//Western blot	20371350|24606633|22473208|22012620|21572407	Unspecified
hsa-mir-93-5p	MIMAT0000093	KLF10	7071	HITS-CLIP	23313552	Unspecified
hsa-mir-93-5p	MIMAT0000093	TLE3	7090	CLASH	23622248	Unspecified
hsa-mir-93-5p	MIMAT0000093	TSPAN6	7105	HITS-CLIP	23313552	Unspecified
hsa-mir-93-5p	MIMAT0000093	GPR137B	7107	HITS-CLIP//PAR-CLIP	20371350|23313552	Unspecified
hsa-mir-93-5p	MIMAT0000093	TRAPPC10	7109	HITS-CLIP	22473208	Unspecified
hsa-mir-93-5p	MIMAT0000093	TNFAIP1	7126	HITS-CLIP	22473208	Unspecified
hsa-mir-93-5p	MIMAT0000093	TPM4	7171	PAR-CLIP	23592263	Unspecified
hsa-mir-93-5p	MIMAT0000093	NR2C2	7182	HITS-CLIP//PAR-CLIP	22473208|23446348|21572407|20371350	Unspecified
hsa-mir-93-5p	MIMAT0000093	TSN	7247	Sequencing	20371350	Unspecified
hsa-mir-93-5p	MIMAT0000093	TSG101	7251	HITS-CLIP//PAR-CLIP//Sequencing	20371350|22473208|23592263|21572407	Unspecified
hsa-mir-93-5p	MIMAT0000093	TXK	7294	HITS-CLIP//PAR-CLIP	22012620|23313552	Unspecified
hsa-mir-93-5p	MIMAT0000093	UBC	7316	HITS-CLIP//PAR-CLIP	22473208|26701625	Unspecified
hsa-mir-93-5p	MIMAT0000093	UBE2L3	7332	CLASH	23622248	Unspecified
hsa-mir-93-5p	MIMAT0000093	UBE2V2	7336	HITS-CLIP	23313552	Unspecified
hsa-mir-93-5p	MIMAT0000093	UGCG	7357	PAR-CLIP	23592263	Unspecified
hsa-mir-93-5p	MIMAT0000093	UQCRC1	7384	CLASH	23622248	Unspecified
hsa-mir-93-5p	MIMAT0000093	VDAC1	7416	HITS-CLIP	22473208	Unspecified
hsa-mir-93-5p	MIMAT0000093	VEGFA	7422	ELISA//Luciferase reporter assay//qRT-PCR//Western blot	18320040|26175939	Unspecified
hsa-mir-93-5p	MIMAT0000093	VLDLR	7436	Sequencing	20371350	Unspecified
hsa-mir-93-5p	MIMAT0000093	EIF4H	7458	PAR-CLIP	22012620|21572407|20371350	Unspecified
hsa-mir-93-5p	MIMAT0000093	WEE1	7465	HITS-CLIP//PAR-CLIP	22473208|23446348	Unspecified
hsa-mir-93-5p	MIMAT0000093	NSD2	7468	HITS-CLIP	22473208	Unspecified
hsa-mir-93-5p	MIMAT0000093	WNT2B	7482	qRT-PCR	24367666	Unspecified
hsa-mir-93-5p	MIMAT0000093	XBP1	7494	CLASH	23622248	Unspecified
hsa-mir-93-5p	MIMAT0000093	YY1	7528	CLASH//Sequencing	20371350|23622248	Unspecified
hsa-mir-93-5p	MIMAT0000093	YWHAZ	7534	PAR-CLIP	21572407|20371350	Unspecified
hsa-mir-93-5p	MIMAT0000093	ZIC2	7546	CLASH	23622248	Unspecified
hsa-mir-93-5p	MIMAT0000093	ZNF7	7553	HITS-CLIP	23313552	Unspecified
hsa-mir-93-5p	MIMAT0000093	ZNF12	7559	HITS-CLIP//PAR-CLIP	22473208|23446348|21572407|20371350	Unspecified
hsa-mir-93-5p	MIMAT0000093	ZNF35	7584	PAR-CLIP	20371350	Unspecified
hsa-mir-93-5p	MIMAT0000093	ZBTB25	7597	HITS-CLIP	23313552	Unspecified
hsa-mir-93-5p	MIMAT0000093	ZNF70	7621	PAR-CLIP	23592263|20371350|27292025	Unspecified
hsa-mir-93-5p	MIMAT0000093	ZNF76	7629	CLASH	23622248	Unspecified
hsa-mir-93-5p	MIMAT0000093	ZNF143	7702	Sequencing	20371350	Unspecified
hsa-mir-93-5p	MIMAT0000093	ZNF148	7707	Sequencing	20371350	Unspecified
hsa-mir-93-5p	MIMAT0000093	ZNF174	7727	HITS-CLIP	23313552	Unspecified
hsa-mir-93-5p	MIMAT0000093	ZNF180	7733	PAR-CLIP//Sequencing	20371350|23446348|22012620|21572407	Unspecified
hsa-mir-93-5p	MIMAT0000093	ZNF202	7753	PAR-CLIP//Sequencing	20371350|23446348|21572407	Unspecified
hsa-mir-93-5p	MIMAT0000093	ZNF217	7764	Sequencing	20371350	Unspecified
hsa-mir-93-5p	MIMAT0000093	SLC30A1	7779	PAR-CLIP	23592263|21572407	Unspecified
hsa-mir-93-5p	MIMAT0000093	LUZP1	7798	Sequencing	20371350	Unspecified
hsa-mir-93-5p	MIMAT0000093	PTP4A1	7803	PAR-CLIP	23592263|21572407|27292025	Unspecified
hsa-mir-93-5p	MIMAT0000093	CSDE1	7812	PAR-CLIP	21572407	Unspecified
hsa-mir-93-5p	MIMAT0000093	BTG2	7832	PAR-CLIP	23592263|21572407	Unspecified
hsa-mir-93-5p	MIMAT0000093	REEP5	7905	HITS-CLIP	22473208	Unspecified
hsa-mir-93-5p	MIMAT0000093	DDX39B	7919	Sequencing	20371350	Unspecified
hsa-mir-93-5p	MIMAT0000093	CCDC6	8030	PAR-CLIP	20371350	Unspecified
hsa-mir-93-5p	MIMAT0000093	SHOC2	8036	PAR-CLIP	23592263|23446348|21572407|26701625	Unspecified
hsa-mir-93-5p	MIMAT0000093	KMT2D	8085	CLASH//Sequencing	20371350|23622248	Unspecified
hsa-mir-93-5p	MIMAT0000093	COIL	8161	PAR-CLIP	23592263|24398324|23446348|21572407|20371350|26701625	Unspecified
hsa-mir-93-5p	MIMAT0000093	NCOA3	8202	HITS-CLIP	22473208	Unspecified
hsa-mir-93-5p	MIMAT0000093	PNPLA4	8228	HITS-CLIP	22473208	Unspecified
hsa-mir-93-5p	MIMAT0000093	SERF1A	8293	PAR-CLIP	22012620	Unspecified
hsa-mir-93-5p	MIMAT0000093	FZD9	8326	PAR-CLIP	23446348|21572407|20371350	Unspecified
hsa-mir-93-5p	MIMAT0000093	HIST1H2BG	8339	HITS-CLIP	23824327	Unspecified
hsa-mir-93-5p	MIMAT0000093	HIST1H3B	8358	CLASH	23622248	Unspecified
hsa-mir-93-5p	MIMAT0000093	ULK1	8408	HITS-CLIP//PAR-CLIP	21572407	Unspecified
hsa-mir-93-5p	MIMAT0000093	EEA1	8411	HITS-CLIP	22473208	Unspecified
hsa-mir-93-5p	MIMAT0000093	DYRK2	8445	CLASH//PAR-CLIP//Sequencing	20371350|23622248|21572407	Unspecified
hsa-mir-93-5p	MIMAT0000093	KLF11	8462	Sequencing	20371350	Unspecified
hsa-mir-93-5p	MIMAT0000093	SEMA7A	8482	PAR-CLIP	23592263	Unspecified
hsa-mir-93-5p	MIMAT0000093	MAPKAPK5	8550	HITS-CLIP	19536157	Unspecified
hsa-mir-93-5p	MIMAT0000093	DEGS1	8560	HITS-CLIP	23824327	Unspecified
hsa-mir-93-5p	MIMAT0000093	AKR7A2	8574	PAR-CLIP	23592263	Unspecified
hsa-mir-93-5p	MIMAT0000093	STC2	8614	Sequencing	20371350	Unspecified
hsa-mir-93-5p	MIMAT0000093	RFXANK	8625	HITS-CLIP	22473208	Unspecified
hsa-mir-93-5p	MIMAT0000093	STX16	8675	CLASH	23622248	Unspecified
hsa-mir-93-5p	MIMAT0000093	PEA15	8682	HITS-CLIP	19536157	Unspecified
hsa-mir-93-5p	MIMAT0000093	GBF1	8729	HITS-CLIP	22473208	Unspecified
hsa-mir-93-5p	MIMAT0000093	CD164	8763	Sequencing	20371350	Unspecified
hsa-mir-93-5p	MIMAT0000093	TNFRSF10B	8795	PAR-CLIP	22012620|21572407	Unspecified
hsa-mir-93-5p	MIMAT0000093	KAT2B	8850	Luciferase reporter assay//Western blot	18728182	Unspecified
hsa-mir-93-5p	MIMAT0000093	IER3	8870	HITS-CLIP	22473208	Unspecified
hsa-mir-93-5p	MIMAT0000093	ARHGEF7	8874	HITS-CLIP	22473208	Unspecified
hsa-mir-93-5p	MIMAT0000093	SQSTM1	8878	HITS-CLIP	22473208	Unspecified
hsa-mir-93-5p	MIMAT0000093	SGPL1	8879	PAR-CLIP	23592263	Unspecified
hsa-mir-93-5p	MIMAT0000093	CDC16	8881	CLASH	23622248	Unspecified
hsa-mir-93-5p	MIMAT0000093	TAX1BP1	8887	HITS-CLIP//PAR-CLIP//Sequencing	20371350|22473208|23592263	Unspecified
hsa-mir-93-5p	MIMAT0000093	EIF2B2	8892	HITS-CLIP	23313552	Unspecified
hsa-mir-93-5p	MIMAT0000093	MTMR3	8897	HITS-CLIP	22473208	Unspecified
hsa-mir-93-5p	MIMAT0000093	HIST1H2BJ	8970	HITS-CLIP	23313552	Unspecified
hsa-mir-93-5p	MIMAT0000093	WASL	8976	PAR-CLIP	21572407|20371350	Unspecified
hsa-mir-93-5p	MIMAT0000093	RPS6KA4	8986	Luciferase reporter assay//Next Generation Sequencing (NGS)//qRT-PCR//Western blot	27350436	Unspecified
hsa-mir-93-5p	MIMAT0000093	ATP6V0E1	8992	HITS-CLIP//PAR-CLIP	22473208|27292025	Unspecified
hsa-mir-93-5p	MIMAT0000093	F2RL3	9002	PAR-CLIP	21572407	Unspecified
hsa-mir-93-5p	MIMAT0000093	MAP3K14	9020	HITS-CLIP	22473208	Unspecified
hsa-mir-93-5p	MIMAT0000093	TM4SF5	9032	HITS-CLIP	23824327	Unspecified
hsa-mir-93-5p	MIMAT0000093	UBE2M	9040	CLASH	23622248	Unspecified
hsa-mir-93-5p	MIMAT0000093	RPL14	9045	HITS-CLIP	23313552	Unspecified
hsa-mir-93-5p	MIMAT0000093	MAP7	9053	PAR-CLIP//Sequencing	20371350|24398324|23446348|22012620	Unspecified
hsa-mir-93-5p	MIMAT0000093	PKMYT1	9088	HITS-CLIP//PAR-CLIP	22473208|26701625	Unspecified
hsa-mir-93-5p	MIMAT0000093	PRPF4	9128	HITS-CLIP	22473208	Unspecified
hsa-mir-93-5p	MIMAT0000093	RABEP1	9135	HITS-CLIP	22473208	Unspecified
hsa-mir-93-5p	MIMAT0000093	SLC28A1	9154	PAR-CLIP	23446348	Unspecified
hsa-mir-93-5p	MIMAT0000093	LPAR2	9170	PAR-CLIP	23592263	Unspecified
hsa-mir-93-5p	MIMAT0000093	MAP3K13	9175	CLASH	23622248	Unspecified
hsa-mir-93-5p	MIMAT0000093	ZBED1	9189	HITS-CLIP	19536157	Unspecified
hsa-mir-93-5p	MIMAT0000093	RPS6KA5	9252	CLASH//PAR-CLIP	23622248|22012620|21572407	Unspecified
hsa-mir-93-5p	MIMAT0000093	STK17B	9262	HITS-CLIP	22473208	Unspecified
hsa-mir-93-5p	MIMAT0000093	TRIP10	9322	Microarray//PAR-CLIP//qRT-PCR//Sequencing	20371350|23592263|22815788	Unspecified
hsa-mir-93-5p	MIMAT0000093	ZFYVE9	9372	PAR-CLIP	23592263|26701625|27292025	Unspecified
hsa-mir-93-5p	MIMAT0000093	MED21	9412	CLASH	23622248	Unspecified
hsa-mir-93-5p	MIMAT0000093	ZNF264	9422	PAR-CLIP//Sequencing	20371350|22012620|21572407	Unspecified
hsa-mir-93-5p	MIMAT0000093	KCNK6	9424	HITS-CLIP	23313552	Unspecified
hsa-mir-93-5p	MIMAT0000093	MED17	9440	HITS-CLIP//PAR-CLIP	22473208|21572407	Unspecified
hsa-mir-93-5p	MIMAT0000093	QKI	9444	PAR-CLIP	23446348|21572407	Unspecified
hsa-mir-93-5p	MIMAT0000093	SH3BP5	9467	HITS-CLIP	23313552	Unspecified
hsa-mir-93-5p	MIMAT0000093	KIF23	9493	HITS-CLIP//PAR-CLIP	22473208|23446348|21572407	Unspecified
hsa-mir-93-5p	MIMAT0000093	SLC4A7	9497	HITS-CLIP	22473208	Unspecified
hsa-mir-93-5p	MIMAT0000093	SPTLC2	9517	PAR-CLIP	22012620	Unspecified
hsa-mir-93-5p	MIMAT0000093	NPEPPS	9520	CLASH	23622248	Unspecified
hsa-mir-93-5p	MIMAT0000093	BAG2	9532	CLASH	23622248	Unspecified
hsa-mir-93-5p	MIMAT0000093	VPS26A	9559	HITS-CLIP	22473208	Unspecified
hsa-mir-93-5p	MIMAT0000093	CLOCK	9575	HITS-CLIP	22473208	Unspecified
hsa-mir-93-5p	MIMAT0000093	ENTPD4	9583	HITS-CLIP	22927820	Unspecified
hsa-mir-93-5p	MIMAT0000093	FEZ2	9637	HITS-CLIP	22473208	Unspecified
hsa-mir-93-5p	MIMAT0000093	SH3PXD2A	9644	Sequencing	20371350	Unspecified
hsa-mir-93-5p	MIMAT0000093	SOCS5	9655	PAR-CLIP	23446348	Unspecified
hsa-mir-93-5p	MIMAT0000093	DZIP3	9666	CLASH	23622248	Unspecified
hsa-mir-93-5p	MIMAT0000093	SLC25A44	9673	PAR-CLIP	21572407	Unspecified
hsa-mir-93-5p	MIMAT0000093	N4BP1	9683	CLASH//HITS-CLIP	23622248|22473208	Unspecified
hsa-mir-93-5p	MIMAT0000093	BZW1	9689	PAR-CLIP	23592263	Unspecified
hsa-mir-93-5p	MIMAT0000093	PPP6R2	9701	Sequencing	20371350	Unspecified
hsa-mir-93-5p	MIMAT0000093	CEP57	9702	HITS-CLIP	22473208	Unspecified
hsa-mir-93-5p	MIMAT0000093	HERPUD1	9709	CLASH	23622248	Unspecified
hsa-mir-93-5p	MIMAT0000093	CEP104	9731	HITS-CLIP	23313552	Unspecified
hsa-mir-93-5p	MIMAT0000093	CCP110	9738	HITS-CLIP	22473208	Unspecified
hsa-mir-93-5p	MIMAT0000093	LAPTM4A	9741	HITS-CLIP//PAR-CLIP	22473208|23592263|24398324|23446348|22012620|21572407|20371350	Unspecified
hsa-mir-93-5p	MIMAT0000093	ARHGAP32	9743	CLASH	23622248	Unspecified
hsa-mir-93-5p	MIMAT0000093	SLK	9748	HITS-CLIP	22473208	Unspecified
hsa-mir-93-5p	MIMAT0000093	KMT2B	9757	PAR-CLIP	22012620|21572407|20371350	Unspecified
hsa-mir-93-5p	MIMAT0000093	KIAA0513	9764	PAR-CLIP	23592263|23446348|21572407	Unspecified
hsa-mir-93-5p	MIMAT0000093	SUSD6	9766	HITS-CLIP	22473208	Unspecified
hsa-mir-93-5p	MIMAT0000093	PCLAF	9768	PAR-CLIP	23446348|20371350	Unspecified
hsa-mir-93-5p	MIMAT0000093	KIAA0232	9778	HITS-CLIP	23824327	Unspecified
hsa-mir-93-5p	MIMAT0000093	SERTAD2	9792	Sequencing	20371350	Unspecified
hsa-mir-93-5p	MIMAT0000093	IP6K1	9807	CLASH	23622248	Unspecified
hsa-mir-93-5p	MIMAT0000093	EFCAB14	9813	HITS-CLIP//PAR-CLIP//Sequencing	20371350|22473208	Unspecified
hsa-mir-93-5p	MIMAT0000093	NUP58	9818	Sequencing	20371350	Unspecified
hsa-mir-93-5p	MIMAT0000093	SPATA2	9825	CLASH	23622248	Unspecified
hsa-mir-93-5p	MIMAT0000093	MELK	9833	HITS-CLIP	23824327	Unspecified
hsa-mir-93-5p	MIMAT0000093	PLEKHM1	9842	PAR-CLIP	26701625	Unspecified
hsa-mir-93-5p	MIMAT0000093	CEP170	9859	PAR-CLIP	22100165|22012620	Unspecified
hsa-mir-93-5p	MIMAT0000093	DDX46	9879	Sequencing	20371350	Unspecified
hsa-mir-93-5p	MIMAT0000093	SMG7	9887	CLASH	23622248	Unspecified
hsa-mir-93-5p	MIMAT0000093	NUAK1	9891	Sequencing	20371350	Unspecified
hsa-mir-93-5p	MIMAT0000093	TELO2	9894	CLASH	23622248	Unspecified
hsa-mir-93-5p	MIMAT0000093	UBAP2L	9898	CLASH	23622248	Unspecified
hsa-mir-93-5p	MIMAT0000093	RABGAP1L	9910	HITS-CLIP	23313552	Unspecified
hsa-mir-93-5p	MIMAT0000093	NCAPD2	9918	HITS-CLIP	22473208	Unspecified
hsa-mir-93-5p	MIMAT0000093	SEC16A	9919	CLASH//HITS-CLIP	23622248|22473208	Unspecified
hsa-mir-93-5p	MIMAT0000093	IQSEC1	9922	HITS-CLIP	22473208	Unspecified
hsa-mir-93-5p	MIMAT0000093	ZBTB5	9925	PAR-CLIP	23592263|21572407|26701625	Unspecified
hsa-mir-93-5p	MIMAT0000093	LPGAT1	9926	HITS-CLIP	22473208	Unspecified
hsa-mir-93-5p	MIMAT0000093	MFN2	9927	CLASH	23622248	Unspecified
hsa-mir-93-5p	MIMAT0000093	WDR1	9948	HITS-CLIP//Sequencing	20371350|22473208	Unspecified
hsa-mir-93-5p	MIMAT0000093	HS3ST1	9957	HITS-CLIP	23313552	Unspecified
hsa-mir-93-5p	MIMAT0000093	USP3	9960	HITS-CLIP	22473208	Unspecified
hsa-mir-93-5p	MIMAT0000093	NUP153	9972	CLASH	23622248	Unspecified
hsa-mir-93-5p	MIMAT0000093	SLC12A6	9990	PAR-CLIP	27292025	Unspecified
hsa-mir-93-5p	MIMAT0000093	ZBTB33	10009	HITS-CLIP//PAR-CLIP//Sequencing	20371350|22473208|23592263|21572407	Unspecified
hsa-mir-93-5p	MIMAT0000093	BCL2L11	10018	HITS-CLIP//PAR-CLIP	23592263|23446348|21572407|20371350|26701625	Unspecified
hsa-mir-93-5p	MIMAT0000093	MED16	10025	PAR-CLIP	23446348|21572407	Unspecified
hsa-mir-93-5p	MIMAT0000093	CHAF1A	10036	HITS-CLIP	22473208	Unspecified
hsa-mir-93-5p	MIMAT0000093	DNAJB6	10049	PAR-CLIP	22012620	Unspecified
hsa-mir-93-5p	MIMAT0000093	DNM1L	10059	HITS-CLIP	22473208	Unspecified
hsa-mir-93-5p	MIMAT0000093	SCAMP2	10066	HITS-CLIP//PAR-CLIP	22473208|20371350|26701625	Unspecified
hsa-mir-93-5p	MIMAT0000093	HUWE1	10075	CLASH	23622248	Unspecified
hsa-mir-93-5p	MIMAT0000093	ACTR2	10097	PAR-CLIP//Sequencing	20371350|23446348|21572407|26701625	Unspecified
hsa-mir-93-5p	MIMAT0000093	ARPC2	10109	CLASH	23622248	Unspecified
hsa-mir-93-5p	MIMAT0000093	FEM1B	10116	PAR-CLIP	21572407|20371350	Unspecified
hsa-mir-93-5p	MIMAT0000093	ABI2	10152	HITS-CLIP	23706177	Unspecified
hsa-mir-93-5p	MIMAT0000093	SERF2	10169	PAR-CLIP	23446348	Unspecified
hsa-mir-93-5p	MIMAT0000093	LHFPL2	10184	Sequencing	20371350	Unspecified
hsa-mir-93-5p	MIMAT0000093	NME6	10201	PAR-CLIP	22012620	Unspecified
hsa-mir-93-5p	MIMAT0000093	TOPORS	10210	HITS-CLIP	22473208	Unspecified
hsa-mir-93-5p	MIMAT0000093	GDF11	10220	PAR-CLIP	21572407	Unspecified
hsa-mir-93-5p	MIMAT0000093	STX6	10228	HITS-CLIP	22473208	Unspecified
hsa-mir-93-5p	MIMAT0000093	HNRNPR	10236	PAR-CLIP	23446348	Unspecified
hsa-mir-93-5p	MIMAT0000093	CALCOCO2	10241	Sequencing	20371350	Unspecified
hsa-mir-93-5p	MIMAT0000093	MARCH6	10299	PAR-CLIP	23446348|22012620|21572407|20371350	Unspecified
hsa-mir-93-5p	MIMAT0000093	BTN3A3	10384	HITS-CLIP	22473208	Unspecified
hsa-mir-93-5p	MIMAT0000093	CDIPT	10423	HITS-CLIP	19536157	Unspecified
hsa-mir-93-5p	MIMAT0000093	ARIH2	10425	Sequencing	20371350	Unspecified
hsa-mir-93-5p	MIMAT0000093	TIMM17A	10440	PAR-CLIP	22012620|21572407|20371350	Unspecified
hsa-mir-93-5p	MIMAT0000093	N4BP2L2	10443	HITS-CLIP	23706177	Unspecified
hsa-mir-93-5p	MIMAT0000093	FAM3C	10447	CLASH	23622248	Unspecified
hsa-mir-93-5p	MIMAT0000093	ZBTB18	10472	HITS-CLIP//PAR-CLIP	22473208|21572407	Unspecified
hsa-mir-93-5p	MIMAT0000093	SLC9A6	10479	CLASH	23622248	Unspecified
hsa-mir-93-5p	MIMAT0000093	SEC23A	10484	HITS-CLIP//Sequencing	20371350|22473208	Unspecified
hsa-mir-93-5p	MIMAT0000093	CAP1	10487	CLASH	23622248	Unspecified
hsa-mir-93-5p	MIMAT0000093	VAT1	10493	CLASH	23622248	Unspecified
hsa-mir-93-5p	MIMAT0000093	SEMA4B	10509	HITS-CLIP	22473208	Unspecified
hsa-mir-93-5p	MIMAT0000093	PRPF8	10594	CLASH	23622248	Unspecified
hsa-mir-93-5p	MIMAT0000093	USP16	10600	HITS-CLIP	22473208	Unspecified
hsa-mir-93-5p	MIMAT0000093	TGOLN2	10618	HITS-CLIP	22473208	Unspecified
hsa-mir-93-5p	MIMAT0000093	POLR3F	10621	HITS-CLIP	23824327	Unspecified
hsa-mir-93-5p	MIMAT0000093	POLR3G	10622	HITS-CLIP	22473208	Unspecified
hsa-mir-93-5p	MIMAT0000093	TXNIP	10628	HITS-CLIP//PAR-CLIP	22473208|24398324|20371350	Unspecified
hsa-mir-93-5p	MIMAT0000093	DCTN6	10671	PAR-CLIP//Sequencing	20371350|23446348	Unspecified
hsa-mir-93-5p	MIMAT0000093	GNB5	10681	HITS-CLIP	23313552|27418678	Unspecified
hsa-mir-93-5p	MIMAT0000093	CCT8	10694	CLASH	23622248	Unspecified
hsa-mir-93-5p	MIMAT0000093	POLQ	10721	HITS-CLIP	22473208	Unspecified
hsa-mir-93-5p	MIMAT0000093	NFAT5	10725	HITS-CLIP//PAR-CLIP	22473208|23592263|23446348|21572407|20371350	Unspecified
hsa-mir-93-5p	MIMAT0000093	PTGES3	10728	HITS-CLIP	22473208	Unspecified
hsa-mir-93-5p	MIMAT0000093	MAP3K2	10746	HITS-CLIP//PAR-CLIP	22473208|23592263|26701625	Unspecified
hsa-mir-93-5p	MIMAT0000093	TRAF3IP2	10758	HITS-CLIP	23313552	Unspecified
hsa-mir-93-5p	MIMAT0000093	ZBTB6	10773	HITS-CLIP	22473208	Unspecified
hsa-mir-93-5p	MIMAT0000093	FRS2	10818	PAR-CLIP//Sequencing	20371350|21572407	Unspecified
hsa-mir-93-5p	MIMAT0000093	SRCAP	10847	HITS-CLIP	23824327	Unspecified
hsa-mir-93-5p	MIMAT0000093	HCP5	10866	HITS-CLIP	22473208	Unspecified
hsa-mir-93-5p	MIMAT0000093	RAB10	10890	PAR-CLIP	21572407|20371350|27292025	Unspecified
hsa-mir-93-5p	MIMAT0000093	PAPOLA	10914	Sequencing	20371350	Unspecified
hsa-mir-93-5p	MIMAT0000093	MORF4L1	10933	PAR-CLIP	23446348|22012620|21572407|20371350	Unspecified
hsa-mir-93-5p	MIMAT0000093	BTG3	10950	HITS-CLIP//PAR-CLIP//Sequencing	20371350|23446348|22012620|21572407	Unspecified
hsa-mir-93-5p	MIMAT0000093	CBX1	10951	PAR-CLIP	21572407	Unspecified
hsa-mir-93-5p	MIMAT0000093	PNRC1	10957	HITS-CLIP	23824327|19536157	Unspecified
hsa-mir-93-5p	MIMAT0000093	YWHAQ	10971	CLASH	23622248	Unspecified
hsa-mir-93-5p	MIMAT0000093	LIAS	11019	HITS-CLIP	23824327|22927820	Unspecified
hsa-mir-93-5p	MIMAT0000093	PAPD7	11044	CLASH	23622248	Unspecified
hsa-mir-93-5p	MIMAT0000093	ABHD2	11057	HITS-CLIP	22473208	Unspecified
hsa-mir-93-5p	MIMAT0000093	RAPGEF4	11069	HITS-CLIP	22473208	Unspecified
hsa-mir-93-5p	MIMAT0000093	TRIOBP	11078	HITS-CLIP	23313552	Unspecified
hsa-mir-93-5p	MIMAT0000093	DNAJB4	11080	HITS-CLIP	23313552	Unspecified
hsa-mir-93-5p	MIMAT0000093	CIT	11113	HITS-CLIP	22473208	Unspecified
hsa-mir-93-5p	MIMAT0000093	FGFR1OP	11116	PAR-CLIP	20371350	Unspecified
hsa-mir-93-5p	MIMAT0000093	BTN3A2	11118	HITS-CLIP	22473208	Unspecified
hsa-mir-93-5p	MIMAT0000093	BTN3A1	11119	HITS-CLIP	22473208	Unspecified
hsa-mir-93-5p	MIMAT0000093	POLR3A	11128	PAR-CLIP	21572407	Unspecified
hsa-mir-93-5p	MIMAT0000093	FICD	11153	PAR-CLIP	21572407	Unspecified
hsa-mir-93-5p	MIMAT0000093	ERLIN2	11160	CLASH	23622248	Unspecified
hsa-mir-93-5p	MIMAT0000093	NUDT3	11165	HITS-CLIP	23313552	Unspecified
hsa-mir-93-5p	MIMAT0000093	BAZ2A	11176	CLASH	23622248	Unspecified
hsa-mir-93-5p	MIMAT0000093	PTENP1	11191	Luciferase reporter assay//qRT-PCR	28212532	Unspecified
hsa-mir-93-5p	MIMAT0000093	SEC23IP	11196	CLASH	23622248	Unspecified
hsa-mir-93-5p	MIMAT0000093	AKAP11	11215	HITS-CLIP//PAR-CLIP//Sequencing	20371350|23592263|24398324|23446348|22012620|21572407|26701625	Unspecified
hsa-mir-93-5p	MIMAT0000093	TUSC2	11334	Luciferase reporter assay//Sequencing//Western blot	19671678|20371350	Unspecified
hsa-mir-93-5p	MIMAT0000093	CBX3	11335	CLASH	23622248	Unspecified
hsa-mir-93-5p	MIMAT0000093	MGLL	11343	Microarray//qRT-PCR	22815788	Unspecified
hsa-mir-93-5p	MIMAT0000093	RRAS2	22800	PAR-CLIP//Sequencing	20371350	Unspecified
hsa-mir-93-5p	MIMAT0000093	HSPA4L	22824	PAR-CLIP	21572407	Unspecified
hsa-mir-93-5p	MIMAT0000093	ZNF652	22834	PAR-CLIP	23592263	Unspecified
hsa-mir-93-5p	MIMAT0000093	RNF44	22838	CLASH	23622248	Unspecified
hsa-mir-93-5p	MIMAT0000093	AAK1	22848	HITS-CLIP	22473208	Unspecified
hsa-mir-93-5p	MIMAT0000093	CHSY1	22856	PAR-CLIP	23592263	Unspecified
hsa-mir-93-5p	MIMAT0000093	ATG14	22863	HITS-CLIP	22473208	Unspecified
hsa-mir-93-5p	MIMAT0000093	INPP5F	22876	HITS-CLIP	22473208	Unspecified
hsa-mir-93-5p	MIMAT0000093	MLXIP	22877	HITS-CLIP	22473208	Unspecified
hsa-mir-93-5p	MIMAT0000093	WDR37	22884	HITS-CLIP	22473208	Unspecified
hsa-mir-93-5p	MIMAT0000093	FOXJ3	22887	HITS-CLIP//PAR-CLIP//Sequencing	20371350|22473208|21572407	Unspecified
hsa-mir-93-5p	MIMAT0000093	UBOX5	22888	HITS-CLIP	23313552	Unspecified
hsa-mir-93-5p	MIMAT0000093	TRAK1	22906	CLASH	23622248	Unspecified
hsa-mir-93-5p	MIMAT0000093	MAPRE3	22924	PAR-CLIP//Sequencing	20371350|24398324|23446348|21572407|27292025	Unspecified
hsa-mir-93-5p	MIMAT0000093	TRIM32	22954	HITS-CLIP	22473208	Unspecified
hsa-mir-93-5p	MIMAT0000093	ACIN1	22985	Sequencing	20371350	Unspecified
hsa-mir-93-5p	MIMAT0000093	FBXO21	23014	HITS-CLIP	22473208	Unspecified
hsa-mir-93-5p	MIMAT0000093	PHLPP2	23035	HITS-CLIP//Luciferase reporter assay//Sequencing	20371350|22473208|25823655	Unspecified
hsa-mir-93-5p	MIMAT0000093	EMC1	23065	PAR-CLIP	22100165	Unspecified
hsa-mir-93-5p	MIMAT0000093	TNRC6B	23112	PAR-CLIP	23446348	Unspecified
hsa-mir-93-5p	MIMAT0000093	ATG2A	23130	HITS-CLIP	22473208	Unspecified
hsa-mir-93-5p	MIMAT0000093	KDM6B	23135	PAR-CLIP	20371350|26701625	Unspecified
hsa-mir-93-5p	MIMAT0000093	NUP205	23165	CLASH	23622248	Unspecified
hsa-mir-93-5p	MIMAT0000093	ZCCHC14	23174	CLASH	23622248	Unspecified
hsa-mir-93-5p	MIMAT0000093	FBXL7	23194	PAR-CLIP	22012620	Unspecified
hsa-mir-93-5p	MIMAT0000093	FAF2	23197	HITS-CLIP	22473208	Unspecified
hsa-mir-93-5p	MIMAT0000093	NBEAL2	23218	CLASH	23622248	Unspecified
hsa-mir-93-5p	MIMAT0000093	TMEM131L	23240	PAR-CLIP	22012620	Unspecified
hsa-mir-93-5p	MIMAT0000093	RPRD2	23248	PAR-CLIP	20371350	Unspecified
hsa-mir-93-5p	MIMAT0000093	ANKRD12	23253	HITS-CLIP	22473208	Unspecified
hsa-mir-93-5p	MIMAT0000093	CAMTA1	23261	HITS-CLIP	22473208	Unspecified
hsa-mir-93-5p	MIMAT0000093	WWC1	23286	HITS-CLIP	23313552	Unspecified
hsa-mir-93-5p	MIMAT0000093	SMG6	23293	CLASH	23622248	Unspecified
hsa-mir-93-5p	MIMAT0000093	BICD2	23299	PAR-CLIP	20371350	Unspecified
hsa-mir-93-5p	MIMAT0000093	MAN2B2	23324	HITS-CLIP	23313552	Unspecified
hsa-mir-93-5p	MIMAT0000093	SASH1	23328	Microarray//qRT-PCR	22815788	Unspecified
hsa-mir-93-5p	MIMAT0000093	U2SURP	23350	HITS-CLIP//PAR-CLIP	22473208|22012620|21572407|20371350	Unspecified
hsa-mir-93-5p	MIMAT0000093	ARHGEF18	23370	HITS-CLIP	22473208	Unspecified
hsa-mir-93-5p	MIMAT0000093	MED13L	23389	Sequencing	20371350	Unspecified
hsa-mir-93-5p	MIMAT0000093	RYBP	23429	Sequencing	20371350	Unspecified
hsa-mir-93-5p	MIMAT0000093	SF3B3	23450	HITS-CLIP	23313552	Unspecified
hsa-mir-93-5p	MIMAT0000093	ICMT	23463	PAR-CLIP//Sequencing	20371350|23592263|21572407	Unspecified
hsa-mir-93-5p	MIMAT0000093	CBX5	23468	HITS-CLIP	23824327	Unspecified
hsa-mir-93-5p	MIMAT0000093	TRAM1	23471	CLASH	23622248	Unspecified
hsa-mir-93-5p	MIMAT0000093	ZFYVE26	23503	PAR-CLIP	23592263|22012620	Unspecified
hsa-mir-93-5p	MIMAT0000093	TTC9	23508	PAR-CLIP	23446348|21572407	Unspecified
hsa-mir-93-5p	MIMAT0000093	POFUT1	23509	HITS-CLIP	22473208	Unspecified
hsa-mir-93-5p	MIMAT0000093	NUP188	23511	CLASH	23622248	Unspecified
hsa-mir-93-5p	MIMAT0000093	ACAP2	23527	HITS-CLIP	22473208	Unspecified
hsa-mir-93-5p	MIMAT0000093	SNAPIN	23557	Sequencing	20371350	Unspecified
hsa-mir-93-5p	MIMAT0000093	KLHDC2	23588	CLASH	23622248	Unspecified
hsa-mir-93-5p	MIMAT0000093	ACOT9	23597	HITS-CLIP//PAR-CLIP	23313552|27292025|27418678	Unspecified
hsa-mir-93-5p	MIMAT0000093	MKRN1	23608	HITS-CLIP	22473208	Unspecified
hsa-mir-93-5p	MIMAT0000093	KPNA6	23633	PAR-CLIP	27292025	Unspecified
hsa-mir-93-5p	MIMAT0000093	SLC7A11	23657	HITS-CLIP	23313552	Unspecified
hsa-mir-93-5p	MIMAT0000093	SH3BP4	23677	CLASH	23622248	Unspecified
hsa-mir-93-5p	MIMAT0000093	TMEM245	23731	HITS-CLIP	22473208	Unspecified
hsa-mir-93-5p	MIMAT0000093	BHMT2	23743	HITS-CLIP	23313552	Unspecified
hsa-mir-93-5p	MIMAT0000093	FJX1	24147	PAR-CLIP	21572407|20371350	Unspecified
hsa-mir-93-5p	MIMAT0000093	HYPK	25764	PAR-CLIP	23446348	Unspecified
hsa-mir-93-5p	MIMAT0000093	DSTYK	25778	PAR-CLIP//Sequencing	20371350|27292025	Unspecified
hsa-mir-93-5p	MIMAT0000093	ASF1A	25842	Sequencing	20371350	Unspecified
hsa-mir-93-5p	MIMAT0000093	ATL3	25923	HITS-CLIP//PAR-CLIP	22473208|23592263	Unspecified
hsa-mir-93-5p	MIMAT0000093	CLIC4	25932	PAR-CLIP	21572407|20371350	Unspecified
hsa-mir-93-5p	MIMAT0000093	ZNF385A	25946	PAR-CLIP	22012620	Unspecified
hsa-mir-93-5p	MIMAT0000093	TSKU	25987	PAR-CLIP	20371350|26701625	Unspecified
hsa-mir-93-5p	MIMAT0000093	WSB1	26118	PAR-CLIP	23446348	Unspecified
hsa-mir-93-5p	MIMAT0000093	KIF1BP	26128	CLASH	23622248	Unspecified
hsa-mir-93-5p	MIMAT0000093	TRPC4AP	26133	CLASH	23622248	Unspecified
hsa-mir-93-5p	MIMAT0000093	FBXL3	26224	Sequencing	20371350	Unspecified
hsa-mir-93-5p	MIMAT0000093	FBXL5	26234	HITS-CLIP//PAR-CLIP//Sequencing	20371350|22473208|23592263|24398324|23446348|22012620|21572407	Unspecified
hsa-mir-93-5p	MIMAT0000093	FBXO10	26267	HITS-CLIP	22473208	Unspecified
hsa-mir-93-5p	MIMAT0000093	SACS	26278	HITS-CLIP	22473208	Unspecified
hsa-mir-93-5p	MIMAT0000093	AGO1	26523	CLASH//HITS-CLIP//Sequencing	20371350|23622248|22473208	Unspecified
hsa-mir-93-5p	MIMAT0000093	LATS2	26524	Luciferase reporter assay//qRT-PCR//Western blot	23111389	Unspecified
hsa-mir-93-5p	MIMAT0000093	BSCL2	26580	PAR-CLIP	23592263	Unspecified
hsa-mir-93-5p	MIMAT0000093	CKAP2	26586	PAR-CLIP	20371350	Unspecified
hsa-mir-93-5p	MIMAT0000093	HBP1	26959	HITS-CLIP//PAR-CLIP	22473208|23592263	Unspecified
hsa-mir-93-5p	MIMAT0000093	USP21	27005	Sequencing	20371350	Unspecified
hsa-mir-93-5p	MIMAT0000093	TPK1	27010	PAR-CLIP	22012620	Unspecified
hsa-mir-93-5p	MIMAT0000093	SND1	27044	CLASH	23622248	Unspecified
hsa-mir-93-5p	MIMAT0000093	MORC1	27136	PAR-CLIP	22291592	Unspecified
hsa-mir-93-5p	MIMAT0000093	SALL3	27164	PAR-CLIP	22012620|21572407	Unspecified
hsa-mir-93-5p	MIMAT0000093	COQ2	27235	Sequencing	20371350	Unspecified
hsa-mir-93-5p	MIMAT0000093	TNFRSF21	27242	HITS-CLIP//PAR-CLIP//Sequencing	20371350|22473208|21572407	Unspecified
hsa-mir-93-5p	MIMAT0000093	SESN1	27244	PAR-CLIP	27292025	Unspecified
hsa-mir-93-5p	MIMAT0000093	RNF115	27246	HITS-CLIP	23313552	Unspecified
hsa-mir-93-5p	MIMAT0000093	PDCD4	27250	Luciferase reporter assay//qRT-PCR//Western blot	27021515	Unspecified
hsa-mir-93-5p	MIMAT0000093	KLHL20	27252	HITS-CLIP	22473208	Unspecified
hsa-mir-93-5p	MIMAT0000093	LSM3	27258	HITS-CLIP	23824327	Unspecified
hsa-mir-93-5p	MIMAT0000093	CRCP	27297	PAR-CLIP	23446348	Unspecified
hsa-mir-93-5p	MIMAT0000093	RAB30	27314	HITS-CLIP	22473208	Unspecified
hsa-mir-93-5p	MIMAT0000093	TNRC6A	27327	HITS-CLIP	22473208	Unspecified
hsa-mir-93-5p	MIMAT0000093	POLM	27434	HITS-CLIP	23824327|23313552	Unspecified
hsa-mir-93-5p	MIMAT0000093	NKIRAS1	28512	PAR-CLIP	20371350	Unspecified
hsa-mir-93-5p	MIMAT0000093	OSTM1	28962	HITS-CLIP	23824327	Unspecified
hsa-mir-93-5p	MIMAT0000093	C11orf54	28970	HITS-CLIP	23313552	Unspecified
hsa-mir-93-5p	MIMAT0000093	SPCS1	28972	HITS-CLIP	23824327	Unspecified
hsa-mir-93-5p	MIMAT0000093	NOB1	28987	CLASH	23622248	Unspecified
hsa-mir-93-5p	MIMAT0000093	ATAD2	29028	PAR-CLIP	22100165	Unspecified
hsa-mir-93-5p	MIMAT0000093	ZC3H7A	29066	CLASH	23622248	Unspecified
hsa-mir-93-5p	MIMAT0000093	MYLIP	29116	HITS-CLIP//PAR-CLIP//Sequencing	20371350|23592263|24398324|23446348|21572407|23313552|26701625|27292025	Unspecified
hsa-mir-93-5p	MIMAT0000093	RACGAP1	29127	PAR-CLIP	20371350	Unspecified
hsa-mir-93-5p	MIMAT0000093	TMOD3	29766	HITS-CLIP	23313552	Unspecified
hsa-mir-93-5p	MIMAT0000093	SENP1	29843	HITS-CLIP	22473208	Unspecified
hsa-mir-93-5p	MIMAT0000093	UBN1	29855	CLASH	23622248	Unspecified
hsa-mir-93-5p	MIMAT0000093	CNOT7	29883	HITS-CLIP	22473208	Unspecified
hsa-mir-93-5p	MIMAT0000093	CERS2	29956	Sequencing//Western blot	20371350|27099514	Unspecified
hsa-mir-93-5p	MIMAT0000093	NRBP1	29959	HITS-CLIP//PAR-CLIP	22473208|23592263	Unspecified
hsa-mir-93-5p	MIMAT0000093	PRICKLE4	29964	PAR-CLIP	23592263	Unspecified
hsa-mir-93-5p	MIMAT0000093	LRP12	29967	PAR-CLIP	20371350	Unspecified
hsa-mir-93-5p	MIMAT0000093	A1CF	29974	PAR-CLIP	22100165	Unspecified
hsa-mir-93-5p	MIMAT0000093	DNTTIP2	30836	PAR-CLIP	23446348	Unspecified
hsa-mir-93-5p	MIMAT0000093	SOCS7	30837	PAR-CLIP	21572407	Unspecified
hsa-mir-93-5p	MIMAT0000093	ZBTB21	49854	Sequencing	20371350	Unspecified
hsa-mir-93-5p	MIMAT0000093	MINK1	50488	HITS-CLIP	22473208|23313552	Unspecified
hsa-mir-93-5p	MIMAT0000093	DCAF8	50717	PAR-CLIP//Sequencing	20371350	Unspecified
hsa-mir-93-5p	MIMAT0000093	ISOC1	51015	PAR-CLIP	21572407	Unspecified
hsa-mir-93-5p	MIMAT0000093	HDDC2	51020	CLASH	23622248	Unspecified
hsa-mir-93-5p	MIMAT0000093	SH3GLB1	51100	PAR-CLIP//Sequencing	20371350|21572407	Unspecified
hsa-mir-93-5p	MIMAT0000093	KMT5B	51111	PAR-CLIP//Sequencing	20371350|22012620	Unspecified
hsa-mir-93-5p	MIMAT0000093	ZNF706	51123	CLASH	23622248	Unspecified
hsa-mir-93-5p	MIMAT0000093	RLIM	51132	PAR-CLIP	21572407	Unspecified
hsa-mir-93-5p	MIMAT0000093	IRAK4	51135	HITS-CLIP	23313552	Unspecified
hsa-mir-93-5p	MIMAT0000093	CERCAM	51148	HITS-CLIP//PAR-CLIP	21572407	Unspecified
hsa-mir-93-5p	MIMAT0000093	DCTN4	51164	Sequencing	20371350	Unspecified
hsa-mir-93-5p	MIMAT0000093	GPN3	51184	Sequencing	20371350	Unspecified
hsa-mir-93-5p	MIMAT0000093	NIN	51199	PAR-CLIP//Sequencing	20371350|23592263|21572407	Unspecified
hsa-mir-93-5p	MIMAT0000093	PDZD11	51248	HITS-CLIP//Sequencing	20371350|22473208	Unspecified
hsa-mir-93-5p	MIMAT0000093	KLF3	51274	PAR-CLIP	22012620	Unspecified
hsa-mir-93-5p	MIMAT0000093	DNAJC27	51277	HITS-CLIP	22473208	Unspecified
hsa-mir-93-5p	MIMAT0000093	TLR7	51284	HITS-CLIP	23313552	Unspecified
hsa-mir-93-5p	MIMAT0000093	ERGIC2	51290	PAR-CLIP	23592263	Unspecified
hsa-mir-93-5p	MIMAT0000093	WAC	51322	CLASH//PAR-CLIP	23622248|23592263|22012620|21572407	Unspecified
hsa-mir-93-5p	MIMAT0000093	ZBTB7A	51341	CLASH//HITS-CLIP//PAR-CLIP	23622248|22473208|20371350	Unspecified
hsa-mir-93-5p	MIMAT0000093	HOOK1	51361	Sequencing	20371350	Unspecified
hsa-mir-93-5p	MIMAT0000093	UBR5	51366	HITS-CLIP//Sequencing	20371350|22473208	Unspecified
hsa-mir-93-5p	MIMAT0000093	ZNF107	51427	PAR-CLIP	21572407	Unspecified
hsa-mir-93-5p	MIMAT0000093	SNX9	51429	Microarray//qRT-PCR	22815788	Unspecified
hsa-mir-93-5p	MIMAT0000093	SUCO	51430	HITS-CLIP//PAR-CLIP//Sequencing	20371350|22473208|24398324|21572407	Unspecified
hsa-mir-93-5p	MIMAT0000093	ANAPC5	51433	CLASH	23622248	Unspecified
hsa-mir-93-5p	MIMAT0000093	REV1	51455	HITS-CLIP	22473208	Unspecified
hsa-mir-93-5p	MIMAT0000093	UBE2J1	51465	Sequencing	20371350	Unspecified
hsa-mir-93-5p	MIMAT0000093	LIMA1	51474	HITS-CLIP//PAR-CLIP//Sequencing	20371350|22473208|22012620	Unspecified
hsa-mir-93-5p	MIMAT0000093	ANKFY1	51479	HITS-CLIP//Sequencing	20371350|22473208	Unspecified
hsa-mir-93-5p	MIMAT0000093	TMEM138	51524	HITS-CLIP	22473208	Unspecified
hsa-mir-93-5p	MIMAT0000093	LGSN	51557	HITS-CLIP	23313552	Unspecified
hsa-mir-93-5p	MIMAT0000093	FKBP7	51661	Sequencing	20371350	Unspecified
hsa-mir-93-5p	MIMAT0000093	ASB1	51665	HITS-CLIP//Sequencing	20371350|22473208	Unspecified
hsa-mir-93-5p	MIMAT0000093	HECA	51696	HITS-CLIP	22473208	Unspecified
hsa-mir-93-5p	MIMAT0000093	CMPK1	51727	HITS-CLIP	22473208	Unspecified
hsa-mir-93-5p	MIMAT0000093	ARID4B	51742	HITS-CLIP//PAR-CLIP//Sequencing	20371350|22473208|23592263|21572407	Unspecified
hsa-mir-93-5p	MIMAT0000093	ERAP1	51752	HITS-CLIP	22473208	Unspecified
hsa-mir-93-5p	MIMAT0000093	RAB8B	51762	CLASH	23622248	Unspecified
hsa-mir-93-5p	MIMAT0000093	KDM3B	51780	Sequencing	20371350	Unspecified
hsa-mir-93-5p	MIMAT0000093	CHIC1	53344	HITS-CLIP	22473208	Unspecified
hsa-mir-93-5p	MIMAT0000093	FXYD5	53827	PAR-CLIP	23446348|21572407|20371350	Unspecified
hsa-mir-93-5p	MIMAT0000093	CSNK1G1	53944	Sequencing	20371350	Unspecified
hsa-mir-93-5p	MIMAT0000093	CYCS	54205	PAR-CLIP	23446348	Unspecified
hsa-mir-93-5p	MIMAT0000093	DNAJC10	54431	PAR-CLIP	23446348	Unspecified
hsa-mir-93-5p	MIMAT0000093	CCSER2	54462	HITS-CLIP	22473208	Unspecified
hsa-mir-93-5p	MIMAT0000093	ANKIB1	54467	HITS-CLIP	22473208	Unspecified
hsa-mir-93-5p	MIMAT0000093	TOLLIP	54472	Sequencing	20371350	Unspecified
hsa-mir-93-5p	MIMAT0000093	RNF216	54476	HITS-CLIP	22473208	Unspecified
hsa-mir-93-5p	MIMAT0000093	TMX3	54495	HITS-CLIP//Sequencing	20371350|22473208	Unspecified
hsa-mir-93-5p	MIMAT0000093	SGTB	54557	HITS-CLIP//Sequencing	20371350|22473208|23313552	Unspecified
hsa-mir-93-5p	MIMAT0000093	CROT	54677	HITS-CLIP	22473208	Unspecified
hsa-mir-93-5p	MIMAT0000093	RRN3	54700	PAR-CLIP//Sequencing	20371350|21572407	Unspecified
hsa-mir-93-5p	MIMAT0000093	OTUD4	54726	PAR-CLIP//Sequencing	20371350	Unspecified
hsa-mir-93-5p	MIMAT0000093	LEPROT	54741	PAR-CLIP	21572407	Unspecified
hsa-mir-93-5p	MIMAT0000093	ZRANB1	54764	HITS-CLIP	22473208	Unspecified
hsa-mir-93-5p	MIMAT0000093	MED18	54797	PAR-CLIP	23446348	Unspecified
hsa-mir-93-5p	MIMAT0000093	KLHL28	54813	HITS-CLIP//PAR-CLIP//Sequencing	20371350|22473208|23592263|21572407|23824327	Unspecified
hsa-mir-93-5p	MIMAT0000093	VPS13C	54832	HITS-CLIP	22473208	Unspecified
hsa-mir-93-5p	MIMAT0000093	FAM46C	54855	HITS-CLIP	22473208	Unspecified
hsa-mir-93-5p	MIMAT0000093	FNBP1L	54874	PAR-CLIP	23446348|21572407|20371350	Unspecified
hsa-mir-93-5p	MIMAT0000093	DPP8	54878	Sequencing	20371350	Unspecified
hsa-mir-93-5p	MIMAT0000093	PXK	54899	HITS-CLIP//PAR-CLIP	23592263|23446348|21572407|20371350	Unspecified
hsa-mir-93-5p	MIMAT0000093	OCIAD1	54940	HITS-CLIP	23313552	Unspecified
hsa-mir-93-5p	MIMAT0000093	DNAJC28	54943	PAR-CLIP	21572407|20371350	Unspecified
hsa-mir-93-5p	MIMAT0000093	GEMIN8	54960	HITS-CLIP	23313552	Unspecified
hsa-mir-93-5p	MIMAT0000093	SLC35F6	54978	HITS-CLIP	22927820	Unspecified
hsa-mir-93-5p	MIMAT0000093	ZNF770	54989	HITS-CLIP	22473208	Unspecified
hsa-mir-93-5p	MIMAT0000093	LAMTOR1	55004	PAR-CLIP	24398324|23446348|20371350	Unspecified
hsa-mir-93-5p	MIMAT0000093	RMND1	55005	HITS-CLIP	23706177	Unspecified
hsa-mir-93-5p	MIMAT0000093	C14orf119	55017	HITS-CLIP	23313552	Unspecified
hsa-mir-93-5p	MIMAT0000093	FKBP14	55033	HITS-CLIP	23313552	Unspecified
hsa-mir-93-5p	MIMAT0000093	ATG16L1	55054	HITS-CLIP//Immunofluorescence//Immunohistochemistry//In situ hybridization//Luciferase reporter assay//Western blot	24036151|22473208	Unspecified
hsa-mir-93-5p	MIMAT0000093	C9orf40	55071	HITS-CLIP//PAR-CLIP	22473208|23446348|21572407|20371350	Unspecified
hsa-mir-93-5p	MIMAT0000093	OXR1	55074	HITS-CLIP	22473208	Unspecified
hsa-mir-93-5p	MIMAT0000093	SAMD4B	55095	CLASH	23622248	Unspecified
hsa-mir-93-5p	MIMAT0000093	DMAC2	55101	Sequencing	20371350	Unspecified
hsa-mir-93-5p	MIMAT0000093	ATG2B	55102	HITS-CLIP	22473208	Unspecified
hsa-mir-93-5p	MIMAT0000093	GPATCH2	55105	Sequencing	20371350	Unspecified
hsa-mir-93-5p	MIMAT0000093	PIWIL2	55124	HITS-CLIP	24906430|23824327|23313552|27418678|28735896	Unspecified
hsa-mir-93-5p	MIMAT0000093	RBM23	55147	CLASH	23622248	Unspecified
hsa-mir-93-5p	MIMAT0000093	MTPAP	55149	PAR-CLIP//Sequencing	20371350|22012620|21572407	Unspecified
hsa-mir-93-5p	MIMAT0000093	CENPQ	55166	PAR-CLIP	23446348|20371350	Unspecified
hsa-mir-93-5p	MIMAT0000093	MRPS10	55173	HITS-CLIP	27418678	Unspecified
hsa-mir-93-5p	MIMAT0000093	RMDN3	55177	Sequencing	20371350	Unspecified
hsa-mir-93-5p	MIMAT0000093	RNF220	55182	CLASH	23622248	Unspecified
hsa-mir-93-5p	MIMAT0000093	RIF1	55183	CLASH	23622248	Unspecified
hsa-mir-93-5p	MIMAT0000093	PBRM1	55193	Sequencing	20371350	Unspecified
hsa-mir-93-5p	MIMAT0000093	CCDC198	55195	HITS-CLIP	23313552	Unspecified
hsa-mir-93-5p	MIMAT0000093	KIAA1551	55196	PAR-CLIP	23446348	Unspecified
hsa-mir-93-5p	MIMAT0000093	ZNF532	55205	PAR-CLIP	22012620	Unspecified
hsa-mir-93-5p	MIMAT0000093	MOB1A	55233	CLASH	23622248	Unspecified
hsa-mir-93-5p	MIMAT0000093	C7orf43	55262	HITS-CLIP	22473208	Unspecified
hsa-mir-93-5p	MIMAT0000093	TMEM100	55273	PAR-CLIP//Sequencing	20371350|21572407	Unspecified
hsa-mir-93-5p	MIMAT0000093	PHF10	55274	Sequencing	20371350	Unspecified
hsa-mir-93-5p	MIMAT0000093	VPS53	55275	HITS-CLIP	23313552	Unspecified
hsa-mir-93-5p	MIMAT0000093	RBM41	55285	HITS-CLIP	23313552	Unspecified
hsa-mir-93-5p	MIMAT0000093	PPP6R3	55291	PAR-CLIP	21572407	Unspecified
hsa-mir-93-5p	MIMAT0000093	OLAH	55301	HITS-CLIP	27418678	Unspecified
hsa-mir-93-5p	MIMAT0000093	RFK	55312	HITS-CLIP	23313552	Unspecified
hsa-mir-93-5p	MIMAT0000093	CPPED1	55313	Sequencing	20371350	Unspecified
hsa-mir-93-5p	MIMAT0000093	C5orf22	55322	Sequencing	20371350	Unspecified
hsa-mir-93-5p	MIMAT0000093	SYNJ2BP	55333	PAR-CLIP	26701625	Unspecified
hsa-mir-93-5p	MIMAT0000093	WDR33	55339	Sequencing	20371350	Unspecified
hsa-mir-93-5p	MIMAT0000093	LAPTM4B	55353	Sequencing	20371350	Unspecified
hsa-mir-93-5p	MIMAT0000093	YOD1	55432	HITS-CLIP//PAR-CLIP//Sequencing	20371350|22473208|22012620	Unspecified
hsa-mir-93-5p	MIMAT0000093	AP1AR	55435	CLASH	23622248	Unspecified
hsa-mir-93-5p	MIMAT0000093	FEM1A	55527	HITS-CLIP	23824327|19536157|28735896	Unspecified
hsa-mir-93-5p	MIMAT0000093	NAGK	55577	PAR-CLIP	23446348|21572407|20371350	Unspecified
hsa-mir-93-5p	MIMAT0000093	ZNF280C	55609	HITS-CLIP	22473208	Unspecified
hsa-mir-93-5p	MIMAT0000093	VPS50	55610	PAR-CLIP	22100165	Unspecified
hsa-mir-93-5p	MIMAT0000093	SYBU	55638	Sequencing	20371350	Unspecified
hsa-mir-93-5p	MIMAT0000093	BCAS4	55653	HITS-CLIP	23313552	Unspecified
hsa-mir-93-5p	MIMAT0000093	TMEM127	55654	HITS-CLIP//PAR-CLIP//Sequencing	20371350|22473208|24398324|21572407|23313552	Unspecified
hsa-mir-93-5p	MIMAT0000093	HIF1AN	55662	HITS-CLIP	22473208	Unspecified
hsa-mir-93-5p	MIMAT0000093	ZNF446	55663	HITS-CLIP	23313552	Unspecified
hsa-mir-93-5p	MIMAT0000093	CDC37L1	55664	Sequencing	20371350	Unspecified
hsa-mir-93-5p	MIMAT0000093	MFN1	55669	PAR-CLIP	23446348	Unspecified
hsa-mir-93-5p	MIMAT0000093	RUFY2	55680	PAR-CLIP	21572407	Unspecified
hsa-mir-93-5p	MIMAT0000093	TSR1	55720	PAR-CLIP	22100165|23446348|21572407	Unspecified
hsa-mir-93-5p	MIMAT0000093	CEP72	55722	PAR-CLIP	23446348|20371350	Unspecified
hsa-mir-93-5p	MIMAT0000093	BTBD7	55727	HITS-CLIP	22473208	Unspecified
hsa-mir-93-5p	MIMAT0000093	CMTR2	55783	HITS-CLIP	22473208	Unspecified
hsa-mir-93-5p	MIMAT0000093	LRIF1	55791	HITS-CLIP	23313552	Unspecified
hsa-mir-93-5p	MIMAT0000093	PCID2	55795	Sequencing	20371350	Unspecified
hsa-mir-93-5p	MIMAT0000093	FOXJ2	55810	PAR-CLIP	21572407	Unspecified
hsa-mir-93-5p	MIMAT0000093	EAPP	55837	CLASH	23622248	Unspecified
hsa-mir-93-5p	MIMAT0000093	UNC45A	55898	CLASH	23622248	Unspecified
hsa-mir-93-5p	MIMAT0000093	UBFD1	56061	HITS-CLIP	22473208	Unspecified
hsa-mir-93-5p	MIMAT0000093	ANKH	56172	PAR-CLIP	23592263|23446348|21572407|20371350	Unspecified
hsa-mir-93-5p	MIMAT0000093	PARD3	56288	HITS-CLIP	23313552	Unspecified
hsa-mir-93-5p	MIMAT0000093	PPAN	56342	CLASH	23622248	Unspecified
hsa-mir-93-5p	MIMAT0000093	EIF5A2	56648	HITS-CLIP	22473208	Unspecified
hsa-mir-93-5p	MIMAT0000093	TMEM9B	56674	PAR-CLIP	22100165	Unspecified
hsa-mir-93-5p	MIMAT0000093	NRIP3	56675	PAR-CLIP	22100165	Unspecified
hsa-mir-93-5p	MIMAT0000093	PAK6	56924	HITS-CLIP	23824327	Unspecified
hsa-mir-93-5p	MIMAT0000093	FEM1C	56929	HITS-CLIP//PAR-CLIP//Sequencing	20371350|22473208|22291592|23446348|22012620	Unspecified
hsa-mir-93-5p	MIMAT0000093	EMSY	56946	HITS-CLIP//PAR-CLIP	22473208|24398324|22012620|21572407|20371350	Unspecified
hsa-mir-93-5p	MIMAT0000093	BBX	56987	PAR-CLIP	23592263|23446348|21572407|20371350	Unspecified
hsa-mir-93-5p	MIMAT0000093	CCDC47	57003	CLASH	23622248	Unspecified
hsa-mir-93-5p	MIMAT0000093	RSRP1	57035	HITS-CLIP//Sequencing	20371350|22473208	Unspecified
hsa-mir-93-5p	MIMAT0000093	ENTPD7	57089	HITS-CLIP	22473208	Unspecified
hsa-mir-93-5p	MIMAT0000093	NUP107	57122	Sequencing	20371350	Unspecified
hsa-mir-93-5p	MIMAT0000093	MAN1C1	57134	Sequencing	20371350	Unspecified
hsa-mir-93-5p	MIMAT0000093	PHTF2	57157	PAR-CLIP	23446348|21572407|20371350	Unspecified
hsa-mir-93-5p	MIMAT0000093	ZNFX1	57169	CLASH//HITS-CLIP//PAR-CLIP	23622248|22473208|23446348|20371350	Unspecified
hsa-mir-93-5p	MIMAT0000093	ZMIZ1	57178	Sequencing	20371350	Unspecified
hsa-mir-93-5p	MIMAT0000093	KIAA1191	57179	CLASH//HITS-CLIP//PAR-CLIP	23622248|22473208|24398324|20371350	Unspecified
hsa-mir-93-5p	MIMAT0000093	ANKRD50	57182	PAR-CLIP	23592263	Unspecified
hsa-mir-93-5p	MIMAT0000093	KIAA1147	57189	PAR-CLIP	23446348	Unspecified
hsa-mir-93-5p	MIMAT0000093	PBXIP1	57326	Sequencing	20371350	Unspecified
hsa-mir-93-5p	MIMAT0000093	CBX8	57332	HITS-CLIP	23824327	Unspecified
hsa-mir-93-5p	MIMAT0000093	RAB22A	57403	HITS-CLIP//PAR-CLIP	22473208|23592263|21572407	Unspecified
hsa-mir-93-5p	MIMAT0000093	PPM1H	57460	CLASH	23622248	Unspecified
hsa-mir-93-5p	MIMAT0000093	ISY1	57461	PAR-CLIP	27292025	Unspecified
hsa-mir-93-5p	MIMAT0000093	HEG1	57493	Sequencing	20371350	Unspecified
hsa-mir-93-5p	MIMAT0000093	MAVS	57506	PAR-CLIP	21572407|20371350	Unspecified
hsa-mir-93-5p	MIMAT0000093	SERINC1	57515	HITS-CLIP	23313552	Unspecified
hsa-mir-93-5p	MIMAT0000093	NUFIP2	57532	HITS-CLIP//PAR-CLIP//Sequencing	20371350|23446348|21572407	Unspecified
hsa-mir-93-5p	MIMAT0000093	SORCS2	57537	PAR-CLIP	22100165	Unspecified
hsa-mir-93-5p	MIMAT0000093	SLAIN2	57606	HITS-CLIP	22473208	Unspecified
hsa-mir-93-5p	MIMAT0000093	POGK	57645	Sequencing	20371350	Unspecified
hsa-mir-93-5p	MIMAT0000093	USP28	57646	HITS-CLIP	22473208	Unspecified
hsa-mir-93-5p	MIMAT0000093	GRAMD1A	57655	HITS-CLIP//Sequencing	20371350|22473208	Unspecified
hsa-mir-93-5p	MIMAT0000093	ZBTB4	57659	HITS-CLIP//Luciferase reporter assay//PAR-CLIP//qRT-PCR//Western blot	22752225|22473208|24398324|21572407|20371350	Unspecified
hsa-mir-93-5p	MIMAT0000093	GPAM	57678	HITS-CLIP	22473208	Unspecified
hsa-mir-93-5p	MIMAT0000093	FAM160B1	57700	PAR-CLIP	23592263|23446348|20371350	Unspecified
hsa-mir-93-5p	MIMAT0000093	SUGP1	57794	HITS-CLIP	23313552	Unspecified
hsa-mir-93-5p	MIMAT0000093	GATAD1	57798	HITS-CLIP	23824327|23313552	Unspecified
hsa-mir-93-5p	MIMAT0000093	RAP2C	57826	PAR-CLIP	21572407	Unspecified
hsa-mir-93-5p	MIMAT0000093	LY6G5B	58496	HITS-CLIP	23313552	Unspecified
hsa-mir-93-5p	MIMAT0000093	EPS15L1	58513	PAR-CLIP	23446348|21572407|20371350	Unspecified
hsa-mir-93-5p	MIMAT0000093	WIZ	58525	Sequencing	20371350	Unspecified
hsa-mir-93-5p	MIMAT0000093	RRAGD	58528	PAR-CLIP	23446348|20371350	Unspecified
hsa-mir-93-5p	MIMAT0000093	ENPP5	59084	PAR-CLIP	21572407|20371350	Unspecified
hsa-mir-93-5p	MIMAT0000093	PLEKHA1	59338	Sequencing	20371350	Unspecified
hsa-mir-93-5p	MIMAT0000093	GNB4	59345	Sequencing	20371350	Unspecified
hsa-mir-93-5p	MIMAT0000093	ELAC2	60528	CLASH	23622248	Unspecified
hsa-mir-93-5p	MIMAT0000093	SLC22A23	63027	PAR-CLIP	23592263	Unspecified
hsa-mir-93-5p	MIMAT0000093	UBE2O	63893	CLASH	23622248	Unspecified
hsa-mir-93-5p	MIMAT0000093	FIGNL1	63979	Sequencing	20371350	Unspecified
hsa-mir-93-5p	MIMAT0000093	SNX16	64089	Microarray//qRT-PCR	22815788	Unspecified
hsa-mir-93-5p	MIMAT0000093	SMOC1	64093	PAR-CLIP	21572407	Unspecified
hsa-mir-93-5p	MIMAT0000093	XYLT2	64132	CLASH	23622248	Unspecified
hsa-mir-93-5p	MIMAT0000093	C17orf75	64149	HITS-CLIP	27418678	Unspecified
hsa-mir-93-5p	MIMAT0000093	ABCG8	64241	HITS-CLIP	23313552	Unspecified
hsa-mir-93-5p	MIMAT0000093	PAPD5	64282	HITS-CLIP	23313552	Unspecified
hsa-mir-93-5p	MIMAT0000093	IKZF4	64375	Sequencing	20371350	Unspecified
hsa-mir-93-5p	MIMAT0000093	ZMAT3	64393	HITS-CLIP	23313552	Unspecified
hsa-mir-93-5p	MIMAT0000093	AKTIP	64400	HITS-CLIP	22473208	Unspecified
hsa-mir-93-5p	MIMAT0000093	TMEM267	64417	HITS-CLIP	22473208	Unspecified
hsa-mir-93-5p	MIMAT0000093	TMEM168	64418	Sequencing	20371350	Unspecified
hsa-mir-93-5p	MIMAT0000093	GIGYF1	64599	HITS-CLIP//PAR-CLIP	22473208|24398324|23446348|21572407|20371350|26701625	Unspecified
hsa-mir-93-5p	MIMAT0000093	UNKL	64718	Microarray	22995316	Unspecified
hsa-mir-93-5p	MIMAT0000093	RMND5B	64777	CLASH	23622248	Unspecified
hsa-mir-93-5p	MIMAT0000093	CRTC3	64784	HITS-CLIP	22473208	Unspecified
hsa-mir-93-5p	MIMAT0000093	EXO5	64789	PAR-CLIP	22012620|21572407	Unspecified
hsa-mir-93-5p	MIMAT0000093	TUT1	64852	CLASH	23622248	Unspecified
hsa-mir-93-5p	MIMAT0000093	NABP1	64859	HITS-CLIP//PAR-CLIP	22473208|23446348|20371350|21572407|26701625	Unspecified
hsa-mir-93-5p	MIMAT0000093	SOWAHC	65124	Sequencing	20371350	Unspecified
hsa-mir-93-5p	MIMAT0000093	MPPE1	65258	HITS-CLIP	27418678	Unspecified
hsa-mir-93-5p	MIMAT0000093	WNK3	65267	PAR-CLIP	22100165	Unspecified
hsa-mir-93-5p	MIMAT0000093	CAPRIN2	65981	HITS-CLIP//PAR-CLIP//Sequencing	20371350|22473208|22012620|21572407	Unspecified
hsa-mir-93-5p	MIMAT0000093	MTMR9	66036	HITS-CLIP	22927820	Unspecified
hsa-mir-93-5p	MIMAT0000093	GID4	79018	HITS-CLIP//PAR-CLIP	22473208|23592263|20371350	Unspecified
hsa-mir-93-5p	MIMAT0000093	ZFYVE21	79038	HITS-CLIP//PAR-CLIP	23592263|23446348|21572407|20371350	Unspecified
hsa-mir-93-5p	MIMAT0000093	TMEM38A	79041	PAR-CLIP	23446348	Unspecified
hsa-mir-93-5p	MIMAT0000093	PRRG4	79056	PAR-CLIP	20371350	Unspecified
hsa-mir-93-5p	MIMAT0000093	C1orf50	79078	HITS-CLIP	23313552	Unspecified
hsa-mir-93-5p	MIMAT0000093	ZNF426	79088	HITS-CLIP	23313552	Unspecified
hsa-mir-93-5p	MIMAT0000093	GNPTAB	79158	PAR-CLIP	21572407	Unspecified
hsa-mir-93-5p	MIMAT0000093	CRELD2	79174	CLASH	23622248	Unspecified
hsa-mir-93-5p	MIMAT0000093	TTPAL	79183	HITS-CLIP	22473208	Unspecified
hsa-mir-93-5p	MIMAT0000093	FYCO1	79443	HITS-CLIP//Sequencing	20371350|22473208	Unspecified
hsa-mir-93-5p	MIMAT0000093	CEP97	79598	HITS-CLIP//PAR-CLIP	22473208|23446348	Unspecified
hsa-mir-93-5p	MIMAT0000093	VCPKMT	79609	HITS-CLIP	22473208	Unspecified
hsa-mir-93-5p	MIMAT0000093	HMBOX1	79618	PAR-CLIP	22012620	Unspecified
hsa-mir-93-5p	MIMAT0000093	ARMT1	79624	HITS-CLIP	27418678	Unspecified
hsa-mir-93-5p	MIMAT0000093	ARSJ	79642	PAR-CLIP//Sequencing	20371350|21572407	Unspecified
hsa-mir-93-5p	MIMAT0000093	PANK3	79646	HITS-CLIP	22473208	Unspecified
hsa-mir-93-5p	MIMAT0000093	PPP1R3B	79660	HITS-CLIP	22473208	Unspecified
hsa-mir-93-5p	MIMAT0000093	TBL1XR1	79718	PAR-CLIP	22012620|26701625|27292025	Unspecified
hsa-mir-93-5p	MIMAT0000093	TBC1D17	79735	HITS-CLIP	22473208	Unspecified
hsa-mir-93-5p	MIMAT0000093	CLIP4	79745	PAR-CLIP	20371350	Unspecified
hsa-mir-93-5p	MIMAT0000093	KLHL36	79786	PAR-CLIP	23446348|21572407|20371350	Unspecified
hsa-mir-93-5p	MIMAT0000093	ZNF665	79788	HITS-CLIP	23313552	Unspecified
hsa-mir-93-5p	MIMAT0000093	FBXO31	79791	HITS-CLIP	22473208	Unspecified
hsa-mir-93-5p	MIMAT0000093	AGMAT	79814	HITS-CLIP//PAR-CLIP	20371350|23313552	Unspecified
hsa-mir-93-5p	MIMAT0000093	METTL8	79828	HITS-CLIP	23313552	Unspecified
hsa-mir-93-5p	MIMAT0000093	ZMYM1	79830	PAR-CLIP	22012620|20371350	Unspecified
hsa-mir-93-5p	MIMAT0000093	PEAK1	79834	HITS-CLIP	22473208	Unspecified
hsa-mir-93-5p	MIMAT0000093	PIP4K2C	79837	HITS-CLIP	22473208	Unspecified
hsa-mir-93-5p	MIMAT0000093	ZBTB3	79842	CLASH	23622248	Unspecified
hsa-mir-93-5p	MIMAT0000093	FAM57A	79850	CLASH//HITS-CLIP	23622248|22473208	Unspecified
hsa-mir-93-5p	MIMAT0000093	CYBRD1	79901	HITS-CLIP	22473208	Unspecified
hsa-mir-93-5p	MIMAT0000093	TNIP3	79931	HITS-CLIP	23313552	Unspecified
hsa-mir-93-5p	MIMAT0000093	SYNPO2L	79933	HITS-CLIP	23313552	Unspecified
hsa-mir-93-5p	MIMAT0000093	ATAT1	79969	HITS-CLIP	23824327|23313552	Unspecified
hsa-mir-93-5p	MIMAT0000093	PCNX2	80003	HITS-CLIP	21572407	Unspecified
hsa-mir-93-5p	MIMAT0000093	PHC3	80012	Sequencing	20371350	Unspecified
hsa-mir-93-5p	MIMAT0000093	FOXRED2	80020	CLASH//HITS-CLIP	23622248|23313552	Unspecified
hsa-mir-93-5p	MIMAT0000093	GPR157	80045	PAR-CLIP	23592263|23446348|20371350	Unspecified
hsa-mir-93-5p	MIMAT0000093	SIKE1	80143	HITS-CLIP	22473208	Unspecified
hsa-mir-93-5p	MIMAT0000093	UXS1	80146	HITS-CLIP	22473208	Unspecified
hsa-mir-93-5p	MIMAT0000093	ABHD18	80167	HITS-CLIP	23313552	Unspecified
hsa-mir-93-5p	MIMAT0000093	CTC1	80169	CLASH	23622248	Unspecified
hsa-mir-93-5p	MIMAT0000093	MYO19	80179	Sequencing	20371350	Unspecified
hsa-mir-93-5p	MIMAT0000093	TMEM134	80194	PAR-CLIP	23446348	Unspecified
hsa-mir-93-5p	MIMAT0000093	RNF34	80196	HITS-CLIP//Sequencing	20371350|23313552	Unspecified
hsa-mir-93-5p	MIMAT0000093	CHD9	80205	HITS-CLIP	22473208	Unspecified
hsa-mir-93-5p	MIMAT0000093	NAA50	80218	HITS-CLIP	22473208	Unspecified
hsa-mir-93-5p	MIMAT0000093	RAB11FIP1	80223	HITS-CLIP//Immunohistochemistry//Luciferase reporter assay//PAR-CLIP//qRT-PCR//Sequencing//Western blot	20371350|22473208|23446348|21572407|27279231	Unspecified
hsa-mir-93-5p	MIMAT0000093	ORAI2	80228	HITS-CLIP	23313552	Unspecified
hsa-mir-93-5p	MIMAT0000093	WDR26	80232	Sequencing	20371350	Unspecified
hsa-mir-93-5p	MIMAT0000093	SLC35F5	80255	HITS-CLIP	22473208|23313552|22927820|27418678	Unspecified
hsa-mir-93-5p	MIMAT0000093	C16orf70	80262	PAR-CLIP//Sequencing	20371350|21572407	Unspecified
hsa-mir-93-5p	MIMAT0000093	PLEKHO2	80301	HITS-CLIP	22473208	Unspecified
hsa-mir-93-5p	MIMAT0000093	KLHL15	80311	HITS-CLIP	22473208	Unspecified
hsa-mir-93-5p	MIMAT0000093	TNKS2	80351	HITS-CLIP//PAR-CLIP	22473208|21572407	Unspecified
hsa-mir-93-5p	MIMAT0000093	DDHD1	80821	HITS-CLIP	22473208	Unspecified
hsa-mir-93-5p	MIMAT0000093	ZFP91	80829	Sequencing	20371350	Unspecified
hsa-mir-93-5p	MIMAT0000093	LNPK	80856	CLASH	23622248	Unspecified
hsa-mir-93-5p	MIMAT0000093	NDEL1	81565	Sequencing	20371350	Unspecified
hsa-mir-93-5p	MIMAT0000093	PDRG1	81572	PAR-CLIP//Sequencing	20371350|23592263|24398324|23446348|21572407	Unspecified
hsa-mir-93-5p	MIMAT0000093	ANKRD13C	81573	HITS-CLIP	22473208	Unspecified
hsa-mir-93-5p	MIMAT0000093	TRIM8	81603	CLASH//HITS-CLIP	23622248|22473208	Unspecified
hsa-mir-93-5p	MIMAT0000093	FAM83D	81610	HITS-CLIP	22473208	Unspecified
hsa-mir-93-5p	MIMAT0000093	C6orf62	81688	CLASH	23622248	Unspecified
hsa-mir-93-5p	MIMAT0000093	SLCO5A1	81796	PAR-CLIP	22100165	Unspecified
hsa-mir-93-5p	MIMAT0000093	NETO2	81831	PAR-CLIP	23592263|21572407	Unspecified
hsa-mir-93-5p	MIMAT0000093	FAHD1	81889	HITS-CLIP	19536157	Unspecified
hsa-mir-93-5p	MIMAT0000093	ZNF93	81931	PAR-CLIP	22012620	Unspecified
hsa-mir-93-5p	MIMAT0000093	DNAL1	83544	HITS-CLIP	23313552	Unspecified
hsa-mir-93-5p	MIMAT0000093	SESN2	83667	HITS-CLIP	22473208	Unspecified
hsa-mir-93-5p	MIMAT0000093	CRISPLD2	83716	HITS-CLIP//PAR-CLIP	23446348|23313552	Unspecified
hsa-mir-93-5p	MIMAT0000093	ITCH	83737	HITS-CLIP	22473208	Unspecified
hsa-mir-93-5p	MIMAT0000093	MIXL1	83881	PAR-CLIP	23446348	Unspecified
hsa-mir-93-5p	MIMAT0000093	TMEM133	83935	HITS-CLIP	21572407	Unspecified
hsa-mir-93-5p	MIMAT0000093	KATNAL1	84056	HITS-CLIP//PAR-CLIP//Sequencing	20371350|22473208|21572407	Unspecified
hsa-mir-93-5p	MIMAT0000093	QRFPR	84109	HITS-CLIP	23313552	Unspecified
hsa-mir-93-5p	MIMAT0000093	ZNRF3	84133	Luciferase reporter assay//qRT-PCR//Western blot	26423400	Unspecified
hsa-mir-93-5p	MIMAT0000093	RPF2	84154	PAR-CLIP	21572407|20371350	Unspecified
hsa-mir-93-5p	MIMAT0000093	GTF2IRD2	84163	HITS-CLIP	23313552	Unspecified
hsa-mir-93-5p	MIMAT0000093	POLR1B	84172	PAR-CLIP	23446348|20371350	Unspecified
hsa-mir-93-5p	MIMAT0000093	USP48	84196	HITS-CLIP//PAR-CLIP	21572407	Unspecified
hsa-mir-93-5p	MIMAT0000093	YIPF4	84272	PAR-CLIP	23446348	Unspecified
hsa-mir-93-5p	MIMAT0000093	SLC25A33	84275	HITS-CLIP	23313552	Unspecified
hsa-mir-93-5p	MIMAT0000093	BTBD10	84280	Sequencing	20371350	Unspecified
hsa-mir-93-5p	MIMAT0000093	FAM213A	84293	HITS-CLIP	23313552	Unspecified
hsa-mir-93-5p	MIMAT0000093	PHF6	84295	HITS-CLIP	22473208	Unspecified
hsa-mir-93-5p	MIMAT0000093	GINS4	84296	PAR-CLIP	23446348|21572407	Unspecified
hsa-mir-93-5p	MIMAT0000093	LLPH	84298	PAR-CLIP	22100165	Unspecified
hsa-mir-93-5p	MIMAT0000093	DDI2	84301	HITS-CLIP	23313552	Unspecified
hsa-mir-93-5p	MIMAT0000093	BRMS1L	84312	HITS-CLIP	22473208	Unspecified
hsa-mir-93-5p	MIMAT0000093	LZIC	84328	PAR-CLIP	23446348|20371350	Unspecified
hsa-mir-93-5p	MIMAT0000093	HOOK3	84376	HITS-CLIP	23313552	Unspecified
hsa-mir-93-5p	MIMAT0000093	MSANTD4	84437	Sequencing	20371350	Unspecified
hsa-mir-93-5p	MIMAT0000093	DCTN5	84516	HITS-CLIP	23313552	Unspecified
hsa-mir-93-5p	MIMAT0000093	C15orf41	84529	HITS-CLIP	23824327	Unspecified
hsa-mir-93-5p	MIMAT0000093	KIAA1841	84542	HITS-CLIP	23313552	Unspecified
hsa-mir-93-5p	MIMAT0000093	MAK16	84549	HITS-CLIP	22473208	Unspecified
hsa-mir-93-5p	MIMAT0000093	FAXC	84553	HITS-CLIP	23824327	Unspecified
hsa-mir-93-5p	MIMAT0000093	PARD6B	84612	HITS-CLIP	22473208	Unspecified
hsa-mir-93-5p	MIMAT0000093	ZBTB37	84614	PAR-CLIP	20371350	Unspecified
hsa-mir-93-5p	MIMAT0000093	MYPN	84665	HITS-CLIP	23313552	Unspecified
hsa-mir-93-5p	MIMAT0000093	USP32	84669	HITS-CLIP	22473208|23824327	Unspecified
hsa-mir-93-5p	MIMAT0000093	ZNF347	84671	HITS-CLIP	23313552	Unspecified
hsa-mir-93-5p	MIMAT0000093	PIGO	84720	HITS-CLIP	22473208	Unspecified
hsa-mir-93-5p	MIMAT0000093	FUT10	84750	PAR-CLIP	23592263|26701625	Unspecified
hsa-mir-93-5p	MIMAT0000093	ZNF514	84874	PAR-CLIP	23446348|21572407	Unspecified
hsa-mir-93-5p	MIMAT0000093	ORAI1	84876	HITS-CLIP	22473208	Unspecified
hsa-mir-93-5p	MIMAT0000093	MFSD2A	84879	HITS-CLIP	23824327	Unspecified
hsa-mir-93-5p	MIMAT0000093	NFATC2IP	84901	HITS-CLIP	22473208	Unspecified
hsa-mir-93-5p	MIMAT0000093	PPP1R15B	84919	PAR-CLIP//Sequencing	20371350|24398324|23446348|22012620|21572407	Unspecified
hsa-mir-93-5p	MIMAT0000093	MASTL	84930	HITS-CLIP//PAR-CLIP	22473208|21572407	Unspecified
hsa-mir-93-5p	MIMAT0000093	WDR73	84942	HITS-CLIP	23706177	Unspecified
hsa-mir-93-5p	MIMAT0000093	BAGE5	85316	HITS-CLIP	22473208	Unspecified
hsa-mir-93-5p	MIMAT0000093	MICALL1	85377	CLASH	23622248	Unspecified
hsa-mir-93-5p	MIMAT0000093	ZIC5	85416	Sequencing	20371350	Unspecified
hsa-mir-93-5p	MIMAT0000093	UNK	85451	PAR-CLIP	22012620	Unspecified
hsa-mir-93-5p	MIMAT0000093	TNKS1BP1	85456	Sequencing	20371350	Unspecified
hsa-mir-93-5p	MIMAT0000093	TANC1	85461	HITS-CLIP	22473208	Unspecified
hsa-mir-93-5p	MIMAT0000093	FHDC1	85462	PAR-CLIP	22012620	Unspecified
hsa-mir-93-5p	MIMAT0000093	ZC3H12C	85463	PAR-CLIP//Sequencing	20371350|23446348|22012620|21572407	Unspecified
hsa-mir-93-5p	MIMAT0000093	SSH2	85464	HITS-CLIP	22473208	Unspecified
hsa-mir-93-5p	MIMAT0000093	UBE3B	89910	Sequencing	20371350	Unspecified
hsa-mir-93-5p	MIMAT0000093	MIDN	90007	HITS-CLIP//PAR-CLIP//Sequencing	20371350|22473208|23592263|24398324|23446348|21572407|27292025	Unspecified
hsa-mir-93-5p	MIMAT0000093	EFCAB11	90141	PAR-CLIP	23446348|21572407	Unspecified
hsa-mir-93-5p	MIMAT0000093	ZSWIM1	90204	CLASH	23622248	Unspecified
hsa-mir-93-5p	MIMAT0000093	COX19	90639	PAR-CLIP	23446348	Unspecified
hsa-mir-93-5p	MIMAT0000093	FMNL3	91010	HITS-CLIP	22473208	Unspecified
hsa-mir-93-5p	MIMAT0000093	DPP9	91039	PAR-CLIP	27292025	Unspecified
hsa-mir-93-5p	MIMAT0000093	ZNF682	91120	HITS-CLIP//PAR-CLIP	23446348|23313552	Unspecified
hsa-mir-93-5p	MIMAT0000093	SLC25A46	91137	PAR-CLIP	21572407	Unspecified
hsa-mir-93-5p	MIMAT0000093	TMEM67	91147	HITS-CLIP	22473208	Unspecified
hsa-mir-93-5p	MIMAT0000093	CDKN2AIPNL	91368	HITS-CLIP	23313552	Unspecified
hsa-mir-93-5p	MIMAT0000093	BTF3L4	91408	PAR-CLIP	23446348|21572407|20371350	Unspecified
hsa-mir-93-5p	MIMAT0000093	RCCD1	91433	HITS-CLIP	22473208	Unspecified
hsa-mir-93-5p	MIMAT0000093	FAAP24	91442	HITS-CLIP	23313552	Unspecified
hsa-mir-93-5p	MIMAT0000093	ACBD5	91452	HITS-CLIP	22473208	Unspecified
hsa-mir-93-5p	MIMAT0000093	C12orf65	91574	HITS-CLIP	23313552	Unspecified
hsa-mir-93-5p	MIMAT0000093	CHURC1	91612	HITS-CLIP	22473208	Unspecified
hsa-mir-93-5p	MIMAT0000093	YTHDC1	91746	HITS-CLIP//Sequencing	20371350|19536157	Unspecified
hsa-mir-93-5p	MIMAT0000093	ELMSAN1	91748	HITS-CLIP	22473208	Unspecified
hsa-mir-93-5p	MIMAT0000093	CABLES1	91768	PAR-CLIP	23592263	Unspecified
hsa-mir-93-5p	MIMAT0000093	MYLK3	91807	HITS-CLIP	23313552	Unspecified
hsa-mir-93-5p	MIMAT0000093	MTSS1L	92154	CLASH	23622248	Unspecified
hsa-mir-93-5p	MIMAT0000093	CDHR1	92211	CLASH	23622248	Unspecified
hsa-mir-93-5p	MIMAT0000093	PXYLP1	92370	Sequencing	20371350	Unspecified
hsa-mir-93-5p	MIMAT0000093	ASB16	92591	HITS-CLIP	23313552	Unspecified
hsa-mir-93-5p	MIMAT0000093	HIST3H2A	92815	CLASH	23622248	Unspecified
hsa-mir-93-5p	MIMAT0000093	UBE2Q2	92912	HITS-CLIP	22473208	Unspecified
hsa-mir-93-5p	MIMAT0000093	DMKN	93099	Sequencing	20371350	Unspecified
hsa-mir-93-5p	MIMAT0000093	HAUS8	93323	HITS-CLIP//PAR-CLIP//Sequencing	20371350|22473208	Unspecified
hsa-mir-93-5p	MIMAT0000093	TADA2B	93624	HITS-CLIP	22473208	Unspecified
hsa-mir-93-5p	MIMAT0000093	CAMK2N2	94032	HITS-CLIP	22473208	Unspecified
hsa-mir-93-5p	MIMAT0000093	SFXN5	94097	Sequencing	20371350	Unspecified
hsa-mir-93-5p	MIMAT0000093	ORMDL3	94103	HITS-CLIP	22473208	Unspecified
hsa-mir-93-5p	MIMAT0000093	ARHGAP12	94134	HITS-CLIP//PAR-CLIP//Sequencing	20371350|22473208|21572407	Unspecified
hsa-mir-93-5p	MIMAT0000093	FOXQ1	94234	PAR-CLIP	23592263|27292025	Unspecified
hsa-mir-93-5p	MIMAT0000093	TP53INP1	94241	Luciferase reporter assay//PAR-CLIP//Western blot	18974142|22100165	Unspecified
hsa-mir-93-5p	MIMAT0000093	EGLN3	112399	PAR-CLIP//Sequencing	20371350|21572407	Unspecified
hsa-mir-93-5p	MIMAT0000093	WDR89	112840	HITS-CLIP	22473208	Unspecified
hsa-mir-93-5p	MIMAT0000093	STK11IP	114790	PAR-CLIP	21572407	Unspecified
hsa-mir-93-5p	MIMAT0000093	FMNL2	114793	PAR-CLIP//Sequencing	20371350|21572407	Unspecified
hsa-mir-93-5p	MIMAT0000093	TMEM123	114908	HITS-CLIP	22473208	Unspecified
hsa-mir-93-5p	MIMAT0000093	RAB42	115273	HITS-CLIP	23706177	Unspecified
hsa-mir-93-5p	MIMAT0000093	PCMTD1	115294	HITS-CLIP	22473208	Unspecified
hsa-mir-93-5p	MIMAT0000093	FCHO2	115548	HITS-CLIP//PAR-CLIP//Sequencing	20371350|22473208|21572407	Unspecified
hsa-mir-93-5p	MIMAT0000093	DIS3L	115752	PAR-CLIP	21572407|27292025	Unspecified
hsa-mir-93-5p	MIMAT0000093	LRRC58	116064	HITS-CLIP//Sequencing	20371350|27418678	Unspecified
hsa-mir-93-5p	MIMAT0000093	LYSMD3	116068	HITS-CLIP	22473208	Unspecified
hsa-mir-93-5p	MIMAT0000093	WDR92	116143	HITS-CLIP	27418678	Unspecified
hsa-mir-93-5p	MIMAT0000093	ABHD15	116236	PAR-CLIP	22012620	Unspecified
hsa-mir-93-5p	MIMAT0000093	FAM129A	116496	HITS-CLIP//PAR-CLIP//Sequencing	20371350|22473208|23446348|21572407	Unspecified
hsa-mir-93-5p	MIMAT0000093	SNAP47	116841	PAR-CLIP	20371350	Unspecified
hsa-mir-93-5p	MIMAT0000093	MED12L	116931	Sequencing	20371350	Unspecified
hsa-mir-93-5p	MIMAT0000093	ARAP2	116984	HITS-CLIP	22473208	Unspecified
hsa-mir-93-5p	MIMAT0000093	THEM4	117145	HITS-CLIP	23313552	Unspecified
hsa-mir-93-5p	MIMAT0000093	RAB3IP	117177	PAR-CLIP	26701625	Unspecified
hsa-mir-93-5p	MIMAT0000093	SSX2IP	117178	HITS-CLIP	22473208	Unspecified
hsa-mir-93-5p	MIMAT0000093	ZNF354B	117608	PAR-CLIP	20371350	Unspecified
hsa-mir-93-5p	MIMAT0000093	RHEBL1	121268	Sequencing	20371350	Unspecified
hsa-mir-93-5p	MIMAT0000093	C14orf28	122525	HITS-CLIP	22473208	Unspecified
hsa-mir-93-5p	MIMAT0000093	FRMD6	122786	HITS-CLIP	22473208	Unspecified
hsa-mir-93-5p	MIMAT0000093	NAA30	122830	Sequencing	20371350	Unspecified
hsa-mir-93-5p	MIMAT0000093	ISCA2	122961	HITS-CLIP	23313552	Unspecified
hsa-mir-93-5p	MIMAT0000093	C15orf40	123207	HITS-CLIP	23824327	Unspecified
hsa-mir-93-5p	MIMAT0000093	NIPA1	123606	HITS-CLIP//PAR-CLIP	22473208|23446348|20371350	Unspecified
hsa-mir-93-5p	MIMAT0000093	FAM210A	125228	HITS-CLIP//PAR-CLIP//Sequencing	20371350|22473208	Unspecified
hsa-mir-93-5p	MIMAT0000093	ZNF813	126017	Sequencing	20371350	Unspecified
hsa-mir-93-5p	MIMAT0000093	TNFAIP8L1	126282	HITS-CLIP//PAR-CLIP	22012620|23313552	Unspecified
hsa-mir-93-5p	MIMAT0000093	NR2C2AP	126382	Sequencing	20371350	Unspecified
hsa-mir-93-5p	MIMAT0000093	TPRG1L	127262	HITS-CLIP//PAR-CLIP	22473208|21572407	Unspecified
hsa-mir-93-5p	MIMAT0000093	RNF19B	127544	HITS-CLIP	23313552	Unspecified
hsa-mir-93-5p	MIMAT0000093	LIX1L	128077	Sequencing	20371350	Unspecified
hsa-mir-93-5p	MIMAT0000093	TBC1D20	128637	Sequencing	20371350	Unspecified
hsa-mir-93-5p	MIMAT0000093	NUP35	129401	HITS-CLIP	22473208	Unspecified
hsa-mir-93-5p	MIMAT0000093	XIRP2	129446	PAR-CLIP	22012620	Unspecified
hsa-mir-93-5p	MIMAT0000093	TYW5	129450	Sequencing	20371350	Unspecified
hsa-mir-93-5p	MIMAT0000093	TAF8	129685	CLASH	23622248	Unspecified
hsa-mir-93-5p	MIMAT0000093	ICA1L	130026	HITS-CLIP	23824327|23313552	Unspecified
hsa-mir-93-5p	MIMAT0000093	OSR1	130497	Sequencing	20371350	Unspecified
hsa-mir-93-5p	MIMAT0000093	DCBLD2	131566	PAR-CLIP	26701625	Unspecified
hsa-mir-93-5p	MIMAT0000093	GRK7	131890	PAR-CLIP	23446348	Unspecified
hsa-mir-93-5p	MIMAT0000093	FAM241A	132720	HITS-CLIP	27418678	Unspecified
hsa-mir-93-5p	MIMAT0000093	ARL9	132946	CLASH	23622248	Unspecified
hsa-mir-93-5p	MIMAT0000093	GRPEL2	134266	HITS-CLIP	22473208	Unspecified
hsa-mir-93-5p	MIMAT0000093	ADAT2	134637	PAR-CLIP	22012620	Unspecified
hsa-mir-93-5p	MIMAT0000093	ZNF786	136051	HITS-CLIP	27418678	Unspecified
hsa-mir-93-5p	MIMAT0000093	NACC2	138151	PAR-CLIP//Sequencing	20371350|23446348	Unspecified
hsa-mir-93-5p	MIMAT0000093	PTPDC1	138639	PAR-CLIP	21572407	Unspecified
hsa-mir-93-5p	MIMAT0000093	BRI3BP	140707	HITS-CLIP	23824327|19536157	Unspecified
hsa-mir-93-5p	MIMAT0000093	ZNF280B	140883	HITS-CLIP	22473208	Unspecified
hsa-mir-93-5p	MIMAT0000093	SAMD8	142891	PAR-CLIP//Sequencing	20371350|21572407	Unspecified
hsa-mir-93-5p	MIMAT0000093	VTI1A	143187	HITS-CLIP	22473208	Unspecified
hsa-mir-93-5p	MIMAT0000093	SESN3	143686	PAR-CLIP	20371350	Unspecified
hsa-mir-93-5p	MIMAT0000093	ZNF597	146434	HITS-CLIP	22473208	Unspecified
hsa-mir-93-5p	MIMAT0000093	ZNF785	146540	HITS-CLIP	23706177	Unspecified
hsa-mir-93-5p	MIMAT0000093	RUNDC1	146923	HITS-CLIP	22473208	Unspecified
hsa-mir-93-5p	MIMAT0000093	WIPF2	147179	PAR-CLIP	21572407	Unspecified
hsa-mir-93-5p	MIMAT0000093	ANKRD29	147463	Sequencing	20371350	Unspecified
hsa-mir-93-5p	MIMAT0000093	ZNF578	147660	HITS-CLIP//PAR-CLIP	23313552|27292025	Unspecified
hsa-mir-93-5p	MIMAT0000093	ZNF417	147687	PAR-CLIP//Sequencing	20371350|23446348|21572407	Unspecified
hsa-mir-93-5p	MIMAT0000093	ZNF681	148213	PAR-CLIP	21572407	Unspecified
hsa-mir-93-5p	MIMAT0000093	SLC30A7	148867	PAR-CLIP	23592263	Unspecified
hsa-mir-93-5p	MIMAT0000093	MANEAL	149175	HITS-CLIP	23313552	Unspecified
hsa-mir-93-5p	MIMAT0000093	SIK1	150094	PAR-CLIP	21572407	Unspecified
hsa-mir-93-5p	MIMAT0000093	DUSP18	150290	HITS-CLIP	22473208	Unspecified
hsa-mir-93-5p	MIMAT0000093	FAM117B	150864	HITS-CLIP	22473208	Unspecified
hsa-mir-93-5p	MIMAT0000093	GPR155	151556	PAR-CLIP	23446348	Unspecified
hsa-mir-93-5p	MIMAT0000093	KLB	152831	CLASH	23622248	Unspecified
hsa-mir-93-5p	MIMAT0000093	CREBRF	153222	Sequencing	20371350	Unspecified
hsa-mir-93-5p	MIMAT0000093	TMEM167A	153339	HITS-CLIP	22473208	Unspecified
hsa-mir-93-5p	MIMAT0000093	RNF145	153830	Sequencing	20371350	Unspecified
hsa-mir-93-5p	MIMAT0000093	CNKSR3	154043	PAR-CLIP	23446348	Unspecified
hsa-mir-93-5p	MIMAT0000093	BMT2	154743	HITS-CLIP	22473208	Unspecified
hsa-mir-93-5p	MIMAT0000093	PRUNE2	158471	Sequencing	20371350	Unspecified
hsa-mir-93-5p	MIMAT0000093	CXorf38	159013	HITS-CLIP	23313552|22927820	Unspecified
hsa-mir-93-5p	MIMAT0000093	DENND5B	160518	HITS-CLIP	22473208	Unspecified
hsa-mir-93-5p	MIMAT0000093	PPTC7	160760	CLASH	23622248	Unspecified
hsa-mir-93-5p	MIMAT0000093	SPRED1	161742	PAR-CLIP//Sequencing	20371350|23592263	Unspecified
hsa-mir-93-5p	MIMAT0000093	UBXN2A	165324	PAR-CLIP//Sequencing	20371350|21572407	Unspecified
hsa-mir-93-5p	MIMAT0000093	CCDC71L	168455	HITS-CLIP//PAR-CLIP	20371350|23313552	Unspecified
hsa-mir-93-5p	MIMAT0000093	ZNF800	168850	HITS-CLIP	22473208	Unspecified
hsa-mir-93-5p	MIMAT0000093	TMEM64	169200	HITS-CLIP//PAR-CLIP	22473208|23592263	Unspecified
hsa-mir-93-5p	MIMAT0000093	ZNF384	171017	CLASH	23622248	Unspecified
hsa-mir-93-5p	MIMAT0000093	AGO3	192669	PAR-CLIP	23446348	Unspecified
hsa-mir-93-5p	MIMAT0000093	SCAMP5	192683	HITS-CLIP	22473208	Unspecified
hsa-mir-93-5p	MIMAT0000093	UBR1	197131	Sequencing	20371350	Unspecified
hsa-mir-93-5p	MIMAT0000093	LDHD	197257	HITS-CLIP	23313552	Unspecified
hsa-mir-93-5p	MIMAT0000093	TXLNA	200081	HITS-CLIP	22473208	Unspecified
hsa-mir-93-5p	MIMAT0000093	IBA57	200205	CLASH	23622248	Unspecified
hsa-mir-93-5p	MIMAT0000093	TET3	200424	HITS-CLIP	22473208	Unspecified
hsa-mir-93-5p	MIMAT0000093	TRIM65	201292	CLASH//PAR-CLIP	23622248|27292025	Unspecified
hsa-mir-93-5p	MIMAT0000093	RAB12	201475	HITS-CLIP	22473208	Unspecified
hsa-mir-93-5p	MIMAT0000093	CCDC125	202243	HITS-CLIP	23313552	Unspecified
hsa-mir-93-5p	MIMAT0000093	VMA21	203547	Sequencing	20371350	Unspecified
hsa-mir-93-5p	MIMAT0000093	C2orf69	205327	HITS-CLIP	22473208	Unspecified
hsa-mir-93-5p	MIMAT0000093	SAMD9L	219285	HITS-CLIP	22473208	Unspecified
hsa-mir-93-5p	MIMAT0000093	TYSND1	219743	CLASH	23622248	Unspecified
hsa-mir-93-5p	MIMAT0000093	SLC16A9	220963	HITS-CLIP//Microarray//qRT-PCR	22473208|22815788	Unspecified
hsa-mir-93-5p	MIMAT0000093	REEP3	221035	HITS-CLIP//PAR-CLIP//Sequencing	20371350|22473208|21572407	Unspecified
hsa-mir-93-5p	MIMAT0000093	KIF6	221458	PAR-CLIP	23446348	Unspecified
hsa-mir-93-5p	MIMAT0000093	ZBTB9	221504	HITS-CLIP	22473208	Unspecified
hsa-mir-93-5p	MIMAT0000093	SMIM13	221710	PAR-CLIP	23592263|21572407|20371350	Unspecified
hsa-mir-93-5p	MIMAT0000093	FOXK1	221937	PAR-CLIP	23446348|21572407	Unspecified
hsa-mir-93-5p	MIMAT0000093	CNOT6L	246175	PAR-CLIP	23592263|23446348|21572407|20371350	Unspecified
hsa-mir-93-5p	MIMAT0000093	RNASEH1	246243	PAR-CLIP	22012620|21572407	Unspecified
hsa-mir-93-5p	MIMAT0000093	PRR14L	253143	HITS-CLIP	22473208	Unspecified
hsa-mir-93-5p	MIMAT0000093	CADM2	253559	PAR-CLIP	22100165	Unspecified
hsa-mir-93-5p	MIMAT0000093	ZDHHC20	253832	PAR-CLIP	23592263|24398324|23446348|21572407|20371350	Unspecified
hsa-mir-93-5p	MIMAT0000093	NPNT	255743	PAR-CLIP	22100165	Unspecified
hsa-mir-93-5p	MIMAT0000093	TMEM196	256130	PAR-CLIP	22012620	Unspecified
hsa-mir-93-5p	MIMAT0000093	MFSD8	256471	PAR-CLIP	23446348|21572407|20371350	Unspecified
hsa-mir-93-5p	MIMAT0000093	ANKS4B	257629	HITS-CLIP	23313552	Unspecified
hsa-mir-93-5p	MIMAT0000093	SGMS1	259230	PAR-CLIP//Sequencing	20371350|23592263	Unspecified
hsa-mir-93-5p	MIMAT0000093	RBM20	282996	PAR-CLIP	23446348|22012620	Unspecified
hsa-mir-93-5p	MIMAT0000093	PGM2L1	283209	HITS-CLIP//Sequencing	20371350|22473208	Unspecified
hsa-mir-93-5p	MIMAT0000093	ANKRD52	283373	HITS-CLIP//PAR-CLIP//Sequencing	20371350|22473208|23446348	Unspecified
hsa-mir-93-5p	MIMAT0000093	GPR137C	283554	Sequencing	20371350	Unspecified
hsa-mir-93-5p	MIMAT0000093	PGP	283871	CLASH	23622248	Unspecified
hsa-mir-93-5p	MIMAT0000093	NEK8	284086	PAR-CLIP	23446348	Unspecified
hsa-mir-93-5p	MIMAT0000093	CAVIN1	284119	PAR-CLIP	23446348|21572407	Unspecified
hsa-mir-93-5p	MIMAT0000093	ZADH2	284273	Sequencing	20371350	Unspecified
hsa-mir-93-5p	MIMAT0000093	ZNF780A	284323	PAR-CLIP	23446348	Unspecified
hsa-mir-93-5p	MIMAT0000093	NBPF15	284565	CLASH	23622248	Unspecified
hsa-mir-93-5p	MIMAT0000093	FAM126B	285172	HITS-CLIP	22473208|23824327	Unspecified
hsa-mir-93-5p	MIMAT0000093	C3orf38	285237	PAR-CLIP//Sequencing	20371350|24398324|23446348|21572407	Unspecified
hsa-mir-93-5p	MIMAT0000093	GPRIN3	285513	HITS-CLIP	23313552	Unspecified
hsa-mir-93-5p	MIMAT0000093	SREK1IP1	285672	PAR-CLIP	22100165	Unspecified
hsa-mir-93-5p	MIMAT0000093	ZNF454	285676	HITS-CLIP	19536157	Unspecified
hsa-mir-93-5p	MIMAT0000093	RGMB	285704	PAR-CLIP	21572407|20371350	Unspecified
hsa-mir-93-5p	MIMAT0000093	HIST2H3A	333932	CLASH	23622248	Unspecified
hsa-mir-93-5p	MIMAT0000093	LUZP2	338645	PAR-CLIP	21572407	Unspecified
hsa-mir-93-5p	MIMAT0000093	CCDC137	339230	HITS-CLIP//PAR-CLIP	22473208|20371350	Unspecified
hsa-mir-93-5p	MIMAT0000093	SPOPL	339745	HITS-CLIP//Sequencing	20371350|22473208	Unspecified
hsa-mir-93-5p	MIMAT0000093	ACER2	340485	PAR-CLIP	24398324	Unspecified
hsa-mir-93-5p	MIMAT0000093	STAC2	342667	HITS-CLIP	22927820	Unspecified
hsa-mir-93-5p	MIMAT0000093	WDR53	348793	HITS-CLIP	23824327|23313552	Unspecified
hsa-mir-93-5p	MIMAT0000093	ZBTB41	360023	Sequencing	20371350	Unspecified
hsa-mir-93-5p	MIMAT0000093	DNAJB13	374407	HITS-CLIP	23313552	Unspecified
hsa-mir-93-5p	MIMAT0000093	DRAXIN	374946	HITS-CLIP	23313552	Unspecified
hsa-mir-93-5p	MIMAT0000093	FAM89A	375061	PAR-CLIP	21572407	Unspecified
hsa-mir-93-5p	MIMAT0000093	C6orf120	387263	HITS-CLIP	22473208	Unspecified
hsa-mir-93-5p	MIMAT0000093	CLEC12B	387837	HITS-CLIP//PAR-CLIP	22012620|19536157	Unspecified
hsa-mir-93-5p	MIMAT0000093	NHLRC3	387921	HITS-CLIP//Sequencing	20371350|22473208	Unspecified
hsa-mir-93-5p	MIMAT0000093	BLOC1S3	388552	HITS-CLIP	22473208	Unspecified
hsa-mir-93-5p	MIMAT0000093	GTF2IRD2B	389524	HITS-CLIP	23313552	Unspecified
hsa-mir-93-5p	MIMAT0000093	NUGGC	389643	HITS-CLIP	23313552	Unspecified
hsa-mir-93-5p	MIMAT0000093	RBM12B	389677	HITS-CLIP//PAR-CLIP	22473208|20371350	Unspecified
hsa-mir-93-5p	MIMAT0000093	ZNF805	390980	PAR-CLIP//Sequencing	20371350|21572407	Unspecified
hsa-mir-93-5p	MIMAT0000093	GRID2IP	392862	CLASH	23622248	Unspecified
hsa-mir-93-5p	MIMAT0000093	FAM102A	399665	HITS-CLIP	22473208	Unspecified
hsa-mir-93-5p	MIMAT0000093	LRRD1	401387	HITS-CLIP	23313552	Unspecified
hsa-mir-93-5p	MIMAT0000093	SAMD12	401474	PAR-CLIP//Sequencing	20371350|21572407	Unspecified
hsa-mir-93-5p	MIMAT0000093	MZT1	440145	Sequencing	20371350	Unspecified
hsa-mir-93-5p	MIMAT0000093	CCDC88C	440193	CLASH	23622248	Unspecified
hsa-mir-93-5p	MIMAT0000093	ZYG11A	440590	HITS-CLIP	23313552	Unspecified
hsa-mir-93-5p	MIMAT0000093	C18orf32	497661	PAR-CLIP//Sequencing	20371350	Unspecified
hsa-mir-93-5p	MIMAT0000093	ATXN7L3B	552889	PAR-CLIP	23592263	Unspecified
hsa-mir-93-5p	MIMAT0000093	GDF5OS	554250	HITS-CLIP	23313552	Unspecified
hsa-mir-93-5p	MIMAT0000093	FBXO48	554251	HITS-CLIP	22473208	Unspecified
hsa-mir-93-5p	MIMAT0000093	HIST2H4B	554313	CLASH	23622248	Unspecified
hsa-mir-93-5p	MIMAT0000093	TMEM200C	645369	PAR-CLIP	21572407|20371350	Unspecified
hsa-mir-93-5p	MIMAT0000093	LINC00598	646982	HITS-CLIP	23313552	Unspecified
hsa-mir-93-5p	MIMAT0000093	ANKRD33B	651746	PAR-CLIP	23592263|23446348|22012620|21572407|20371350	Unspecified
hsa-mir-93-5p	MIMAT0000093	GTF2H2C	728340	HITS-CLIP	23824327|23313552	Unspecified
hsa-mir-93-5p	MIMAT0000093	SERF1B	728492	PAR-CLIP	22012620	Unspecified
hsa-mir-93-5p	MIMAT0000093	CCDC30	728621	HITS-CLIP	22927820	Unspecified
hsa-mir-93-5p	MIMAT0000093	TMEM242	729515	PAR-CLIP	23446348|20371350	Unspecified
hsa-mir-93-5p	MIMAT0000093	C16orf52	730094	PAR-CLIP	21572407	Unspecified
hsa-mir-93-5p	MIMAT0000093	RPL17-C18orf32	100526842	PAR-CLIP	20371350	Unspecified
hsa-mir-93-5p	MIMAT0000093	MINOS1-NBL1	100532736	PAR-CLIP	26701625	Unspecified
hsa-mir-93-5p	MIMAT0000093	ATP6V1G2-DDX39B	100532737	Sequencing	20371350	Unspecified
hsa-mir-182-5p	MIMAT0000259	ACTN4	81	CLASH	23622248	Unspecified
hsa-mir-182-5p	MIMAT0000259	ACVR1B	91	CLASH	23622248	Unspecified
hsa-mir-182-5p	MIMAT0000259	ADCY6	112	Luciferase reporter assay//qRT-PCR	17597072|20656788	Unspecified
hsa-mir-182-5p	MIMAT0000259	ATF1	466	Luciferase reporter assay	23249749	Unspecified
hsa-mir-182-5p	MIMAT0000259	ATP5O	539	CLASH	23622248	Unspecified
hsa-mir-182-5p	MIMAT0000259	BAG1	573	CLASH	23622248	Unspecified
hsa-mir-182-5p	MIMAT0000259	BARD1	580	Luciferase reporter assay	23249749	Unspecified
hsa-mir-182-5p	MIMAT0000259	BCL2	596	Flow//Luciferase reporter assay//qRT-PCR//Western blot	22848417|23936432	Unspecified
hsa-mir-182-5p	MIMAT0000259	BDNF	627	Luciferase reporter assay//qRT-PCR//Western blotting	23704927|25955435	Unspecified
hsa-mir-182-5p	MIMAT0000259	ZFP36L1	677	PAR-CLIP	26701625	Unspecified
hsa-mir-182-5p	MIMAT0000259	VPS51	738	CLASH	23622248	Unspecified
hsa-mir-182-5p	MIMAT0000259	SERPINH1	871	PAR-CLIP	23592263	Unspecified
hsa-mir-182-5p	MIMAT0000259	CCND2	894	Flow//Luciferase reporter assay//qRT-PCR//Western blot	22848417	Unspecified
hsa-mir-182-5p	MIMAT0000259	CDKN1A	1026	Luciferase reporter assay//qRT-PCR//Western blot	20190813	Unspecified
hsa-mir-182-5p	MIMAT0000259	CDKN1B	1027	Luciferase reporter assay	23249749	Unspecified
hsa-mir-182-5p	MIMAT0000259	CPE	1363	HITS-CLIP	23824327	Unspecified
hsa-mir-182-5p	MIMAT0000259	CREB1	1385	GFP reporter assay	22325466	Unspecified
hsa-mir-182-5p	MIMAT0000259	CYLD	1540	Luciferase reporter assay//qRT-PCR//Western blot	23006329	Unspecified
hsa-mir-182-5p	MIMAT0000259	TSC22D3	1831	Luciferase reporter assay//qRT-PCR	20656788	Unspecified
hsa-mir-182-5p	MIMAT0000259	EIF4EBP2	1979	HITS-CLIP	23824327	Unspecified
hsa-mir-182-5p	MIMAT0000259	EP300	2033	Microarray	19569050	Unspecified
hsa-mir-182-5p	MIMAT0000259	ETV3	2117	CLASH	23622248	Unspecified
hsa-mir-182-5p	MIMAT0000259	FGF9	2254	Luciferase reporter assay//Western blot	22917588	Unspecified
hsa-mir-182-5p	MIMAT0000259	FOXF2	2295	Luciferase reporter assay	23383207	Unspecified
hsa-mir-182-5p	MIMAT0000259	FOXO1	2308	Immunohistochemistry//Luciferase reporter assay//Microarray//PAR-CLIP//qRT-PCR//Western blot	19574223|24865442|22012620	Unspecified
hsa-mir-182-5p	MIMAT0000259	FOXO3	2309	Luciferase reporter assay//Western blot	19188590|23262295	Unspecified
hsa-mir-182-5p	MIMAT0000259	GABRB1	2560	HITS-CLIP	23824327|27418678	Unspecified
hsa-mir-182-5p	MIMAT0000259	GNL1	2794	CLASH	23622248	Unspecified
hsa-mir-182-5p	MIMAT0000259	NR3C1	2908	HITS-CLIP	23313552	Unspecified
hsa-mir-182-5p	MIMAT0000259	GSK3B	2932	Immunohistochemistry//Luciferase reporter assay//Microarray//qRT-PCR//Western blot	24335145	Unspecified
hsa-mir-182-5p	MIMAT0000259	HOXA9	3205	PAR-CLIP	21572407	Unspecified
hsa-mir-182-5p	MIMAT0000259	IGF1R	3480	PAR-CLIP	21572407	Unspecified
hsa-mir-182-5p	MIMAT0000259	INCENP	3619	PAR-CLIP	21572407|20371350	Unspecified
hsa-mir-182-5p	MIMAT0000259	IPP	3652	HITS-CLIP	23824327	Unspecified
hsa-mir-182-5p	MIMAT0000259	LBR	3930	CLASH	23622248	Unspecified
hsa-mir-182-5p	MIMAT0000259	LOX	4015	PAR-CLIP	27292025	Unspecified
hsa-mir-182-5p	MIMAT0000259	SMAD4	4089	Luciferase reporter assay	23226455	Unspecified
hsa-mir-182-5p	MIMAT0000259	MAP3K3	4215	PAR-CLIP	21572407	Unspecified
hsa-mir-182-5p	MIMAT0000259	MITF	4286	Flow//Luciferase reporter assay//qRT-PCR//Western blot	17597072|22848417	Unspecified
hsa-mir-182-5p	MIMAT0000259	PPP1R12A	4659	PAR-CLIP	21572407	Unspecified
hsa-mir-182-5p	MIMAT0000259	NFIC	4782	PAR-CLIP	26701625	Unspecified
hsa-mir-182-5p	MIMAT0000259	NOTCH2	4853	HITS-CLIP	23824327	Unspecified
hsa-mir-182-5p	MIMAT0000259	NPM1	4869	PAR-CLIP	26701625	Unspecified
hsa-mir-182-5p	MIMAT0000259	NPTX1	4884	HITS-CLIP	23824327	Unspecified
hsa-mir-182-5p	MIMAT0000259	PCDH8	5100	Luciferase reporter assay	27246830	Unspecified
hsa-mir-182-5p	MIMAT0000259	PDK4	5166	Luciferase reporter assay//qRT-PCR//Western blot	27396327	Unspecified
hsa-mir-182-5p	MIMAT0000259	PFKFB3	5209	HITS-CLIP	28735896	Unspecified
hsa-mir-182-5p	MIMAT0000259	PFN1	5216	Luciferase reporter assay//PAR-CLIP	23430586|24398324|23446348|22012620|21572407|26701625	Unspecified
hsa-mir-182-5p	MIMAT0000259	PIK3C2A	5286	CLASH	23622248	Unspecified
hsa-mir-182-5p	MIMAT0000259	PLAGL2	5326	PAR-CLIP	27292025	Unspecified
hsa-mir-182-5p	MIMAT0000259	PLD1	5337	Immunofluorescence//Western blot	26787840	Unspecified
hsa-mir-182-5p	MIMAT0000259	PODXL	5420	PAR-CLIP	22012620	Unspecified
hsa-mir-182-5p	MIMAT0000259	PRKAA2	5563	CLASH	23622248	Unspecified
hsa-mir-182-5p	MIMAT0000259	PTEN	5728	Luciferase reporter assay//Microarray//qRT-PCR//Western blot	24867318	Unspecified
hsa-mir-182-5p	MIMAT0000259	RAB5B	5869	PAR-CLIP	26701625	Unspecified
hsa-mir-182-5p	MIMAT0000259	RAD17	5884	Luciferase reporter assay	23249749	Unspecified
hsa-mir-182-5p	MIMAT0000259	RARG	5916	Luciferase reporter assay//Western blot	19782699	Unspecified
hsa-mir-182-5p	MIMAT0000259	RASA2	5922	PAR-CLIP	22100165	Unspecified
hsa-mir-182-5p	MIMAT0000259	KDM5A	5927	HITS-CLIP	23824327	Unspecified
hsa-mir-182-5p	MIMAT0000259	RGS2	5997	HITS-CLIP	28735896	Unspecified
hsa-mir-182-5p	MIMAT0000259	RLF	6018	CLASH	23622248	Unspecified
hsa-mir-182-5p	MIMAT0000259	RPL5	6125	CLASH	23622248	Unspecified
hsa-mir-182-5p	MIMAT0000259	RPS3	6188	CLASH	23622248	Unspecified
hsa-mir-182-5p	MIMAT0000259	RPS4X	6191	CLASH	23622248	Unspecified
hsa-mir-182-5p	MIMAT0000259	RPS23	6228	PAR-CLIP	23446348|20371350	Unspecified
hsa-mir-182-5p	MIMAT0000259	CCL22	6367	PAR-CLIP	23592263	Unspecified
hsa-mir-182-5p	MIMAT0000259	SLC11A1	6556	HITS-CLIP	23824327	Unspecified
hsa-mir-182-5p	MIMAT0000259	SNAI2	6591	Luciferase reporter assay	23354685	Unspecified
hsa-mir-182-5p	MIMAT0000259	SMARCD3	6604	Luciferase reporter assay	23249749	Unspecified
hsa-mir-182-5p	MIMAT0000259	SNRPA1	6627	CLASH	23622248	Unspecified
hsa-mir-182-5p	MIMAT0000259	PPP1R11	6992	PAR-CLIP	23592263|27292025	Unspecified
hsa-mir-182-5p	MIMAT0000259	THBS1	7057	Luciferase reporter assay	24053448	Unspecified
hsa-mir-182-5p	MIMAT0000259	TIAM1	7074	Luciferase reporter assay//qRT-PCR//Western blot	25973950	Unspecified
hsa-mir-182-5p	MIMAT0000259	TP53BP1	7158	Luciferase reporter assay	23249749	Unspecified
hsa-mir-182-5p	MIMAT0000259	UBA1	7317	CLASH	23622248	Unspecified
hsa-mir-182-5p	MIMAT0000259	UBP1	7342	CLASH	23622248	Unspecified
hsa-mir-182-5p	MIMAT0000259	UQCRFS1	7386	Flow//Luciferase reporter assay//qRT-PCR//Western blot	27476169	Unspecified
hsa-mir-182-5p	MIMAT0000259	ZNF185	7739	HITS-CLIP	23313552	Unspecified
hsa-mir-182-5p	MIMAT0000259	EVI5	7813	CLASH//PAR-CLIP	23622248|24398324|27292025	Unspecified
hsa-mir-182-5p	MIMAT0000259	CUL5	8065	qRT-PCR	26847831	Unspecified
hsa-mir-182-5p	MIMAT0000259	USP5	8078	HITS-CLIP	23313552	Unspecified
hsa-mir-182-5p	MIMAT0000259	RECK	8434	Luciferase reporter assay//PAR-CLIP//qRT-PCR//Western blot	23333633|23226455|23383207|21572407|26609496	Unspecified
hsa-mir-182-5p	MIMAT0000259	FAM193A	8603	HITS-CLIP	19536157	Unspecified
hsa-mir-182-5p	MIMAT0000259	TNFRSF10A	8797	PAR-CLIP	20371350	Unspecified
hsa-mir-182-5p	MIMAT0000259	MBD4	8930	PAR-CLIP	24398324|21572407	Unspecified
hsa-mir-182-5p	MIMAT0000259	SLC25A14	9016	CLASH	23622248	Unspecified
hsa-mir-182-5p	MIMAT0000259	SYNGR2	9144	PAR-CLIP	20371350	Unspecified
hsa-mir-182-5p	MIMAT0000259	STK17B	9262	HITS-CLIP	23824327	Unspecified
hsa-mir-182-5p	MIMAT0000259	CLOCK	9575	Luciferase reporter assay//qRT-PCR	20656788	Unspecified
hsa-mir-182-5p	MIMAT0000259	CREB5	9586	Luciferase reporter assay	23249749	Unspecified
hsa-mir-182-5p	MIMAT0000259	MTSS1	9788	Luciferase reporter assay	22322863|22681717|23383207|23474751	Unspecified
hsa-mir-182-5p	MIMAT0000259	RBM12	10137	CLASH	23622248	Unspecified
hsa-mir-182-5p	MIMAT0000259	FLOT1	10211	CLASH//Immunohistochemistry//luciferase reporter assays//qRT-PCR//Western blot	23622248|24886554	Unspecified
hsa-mir-182-5p	MIMAT0000259	CITED2	10370	PAR-CLIP	21572407	Unspecified
hsa-mir-182-5p	MIMAT0000259	TUBA1B	10376	CLASH	23622248	Unspecified
hsa-mir-182-5p	MIMAT0000259	NDRG1	10397	Luciferase reporter assay	23874837	Unspecified
hsa-mir-182-5p	MIMAT0000259	USP16	10600	CLASH	23622248	Unspecified
hsa-mir-182-5p	MIMAT0000259	STAG2	10735	CLASH	23622248	Unspecified
hsa-mir-182-5p	MIMAT0000259	CHL1	10752	Luciferase reporter assay/QRTPCR///Western blot	24971532	Unspecified
hsa-mir-182-5p	MIMAT0000259	NUP50	10762	PAR-CLIP	20371350	Unspecified
hsa-mir-182-5p	MIMAT0000259	MALT1	10892	PAR-CLIP	22012620	Unspecified
hsa-mir-182-5p	MIMAT0000259	MORF4L1	10933	PAR-CLIP	21572407|27292025	Unspecified
hsa-mir-182-5p	MIMAT0000259	CHEK2	11200	Luciferase reporter assay	23249749	Unspecified
hsa-mir-182-5p	MIMAT0000259	CASC3	22794	CLASH	23622248	Unspecified
hsa-mir-182-5p	MIMAT0000259	SIN3B	23309	PAR-CLIP	23592263|26701625	Unspecified
hsa-mir-182-5p	MIMAT0000259	SATB2	23314	Luciferase reporter assay//QRTPCR//Western blot	24884732	Unspecified
hsa-mir-182-5p	MIMAT0000259	TTC28	23331	CLASH	23622248	Unspecified
hsa-mir-182-5p	MIMAT0000259	SYNM	23336	PAR-CLIP	22012620	Unspecified
hsa-mir-182-5p	MIMAT0000259	EXOSC2	23404	HITS-CLIP	23824327	Unspecified
hsa-mir-182-5p	MIMAT0000259	CBX6	23466	CLASH	23622248	Unspecified
hsa-mir-182-5p	MIMAT0000259	DDAH1	23576	PAR-CLIP	21572407	Unspecified
hsa-mir-182-5p	MIMAT0000259	CADM1	23705	Luciferase reporter assay//qRT-PCR//Western blot	24445397	Unspecified
hsa-mir-182-5p	MIMAT0000259	PNISR	25957	PAR-CLIP	21572407	Unspecified
hsa-mir-182-5p	MIMAT0000259	LSM14A	26065	CLASH	23622248	Unspecified
hsa-mir-182-5p	MIMAT0000259	PCOLCE2	26577	CLASH	23622248	Unspecified
hsa-mir-182-5p	MIMAT0000259	PDCD4	27250	Luciferase reporter assay//qRT-PCR//Western blot	23296900|23877371	Unspecified
hsa-mir-182-5p	MIMAT0000259	TNRC6A	27327	PAR-CLIP	22012620	Unspecified
hsa-mir-182-5p	MIMAT0000259	CTNNA3	29119	PAR-CLIP	22100165	Unspecified
hsa-mir-182-5p	MIMAT0000259	RBM15B	29890	CLASH	23622248	Unspecified
hsa-mir-182-5p	MIMAT0000259	ERO1A	30001	CLASH	23622248	Unspecified
hsa-mir-182-5p	MIMAT0000259	NTM	50863	Luciferase reporter assay//Western blot	22917588	Unspecified
hsa-mir-182-5p	MIMAT0000259	TUBD1	51174	PAR-CLIP	20371350	Unspecified
hsa-mir-182-5p	MIMAT0000259	NRN1	51299	Luciferase reporter assay	26622652	Unspecified
hsa-mir-182-5p	MIMAT0000259	UBE2D4	51619	PAR-CLIP	22012620|20371350	Unspecified
hsa-mir-182-5p	MIMAT0000259	ATP8A2	51761	PAR-CLIP	26701625	Unspecified
hsa-mir-182-5p	MIMAT0000259	BRWD1	54014	HITS-CLIP	23313552	Unspecified
hsa-mir-182-5p	MIMAT0000259	KLHL28	54813	PAR-CLIP	23592263|21572407|20371350	Unspecified
hsa-mir-182-5p	MIMAT0000259	SEC61A2	55176	CLASH	23622248	Unspecified
hsa-mir-182-5p	MIMAT0000259	FBXW7	55294	Luciferase reporter assay//Western blot	25269767	Unspecified
hsa-mir-182-5p	MIMAT0000259	TMEM184C	55751	CLASH	23622248	Unspecified
hsa-mir-182-5p	MIMAT0000259	ECHDC1	55862	PAR-CLIP	21572407	Unspecified
hsa-mir-182-5p	MIMAT0000259	RCC2	55920	CLASH	23622248	Unspecified
hsa-mir-182-5p	MIMAT0000259	TCEAL7	56849	Luciferase reporter assay//qRT-PCR//Western blot	24021963	Unspecified
hsa-mir-182-5p	MIMAT0000259	LRTM1	57408	HITS-CLIP	27418678	Unspecified
hsa-mir-182-5p	MIMAT0000259	NUFIP2	57532	CLASH	23622248	Unspecified
hsa-mir-182-5p	MIMAT0000259	ARRDC3	57561	Luciferase reporter assay	27109471	Unspecified
hsa-mir-182-5p	MIMAT0000259	CRAMP1	57585	PAR-CLIP	21572407	Unspecified
hsa-mir-182-5p	MIMAT0000259	LRRC4	64101	Immunohistochemistry//Luciferase reporter assay//qRT-PCR	24404152	Unspecified
hsa-mir-182-5p	MIMAT0000259	GID4	79018	HITS-CLIP	23824327|23313552|19536157|27418678|28735896	Unspecified
hsa-mir-182-5p	MIMAT0000259	ATP13A3	79572	CLASH	23622248	Unspecified
hsa-mir-182-5p	MIMAT0000259	ZFAND1	79752	HITS-CLIP	23313552	Unspecified
hsa-mir-182-5p	MIMAT0000259	QSER1	79832	PAR-CLIP	21572407	Unspecified
hsa-mir-182-5p	MIMAT0000259	ULBP2	80328	Luciferase reporter assay//qRT-PCR//Western blot	23956116	Unspecified
hsa-mir-182-5p	MIMAT0000259	TRIM8	81603	Luciferase reporter assay//qRT-PCR//Western blot	28280352	Unspecified
hsa-mir-182-5p	MIMAT0000259	PITPNM3	83394	PAR-CLIP	23592263	Unspecified
hsa-mir-182-5p	MIMAT0000259	SH3BGRL3	83442	PAR-CLIP	26701625	Unspecified
hsa-mir-182-5p	MIMAT0000259	AMMECR1L	83607	PAR-CLIP	26701625	Unspecified
hsa-mir-182-5p	MIMAT0000259	SESN2	83667	PAR-CLIP	23446348	Unspecified
hsa-mir-182-5p	MIMAT0000259	BRIP1	83990	CLASH	23622248	Unspecified
hsa-mir-182-5p	MIMAT0000259	SYDE2	84144	PAR-CLIP	21572407	Unspecified
hsa-mir-182-5p	MIMAT0000259	LZIC	84328	PAR-CLIP	20371350	Unspecified
hsa-mir-182-5p	MIMAT0000259	PLEKHA8	84725	HITS-CLIP	23824327	Unspecified
hsa-mir-182-5p	MIMAT0000259	TNKS1BP1	85456	CLASH	23622248	Unspecified
hsa-mir-182-5p	MIMAT0000259	FMNL3	91010	CLASH	23622248	Unspecified
hsa-mir-182-5p	MIMAT0000259	ZFAND4	93550	Immunofluorescence//Immunohistochemistry//Luciferase reporter assay//Microarray//qRT-PCR//Western blot	25682742	Unspecified
hsa-mir-182-5p	MIMAT0000259	TP53INP1	94241	Luciferase reporter assay//qRT-PCR//Western blot	24447717	Unspecified
hsa-mir-182-5p	MIMAT0000259	RAB3IP	117177	CLASH	23622248	Unspecified
hsa-mir-182-5p	MIMAT0000259	ZNF831	128611	HITS-CLIP	23824327	Unspecified
hsa-mir-182-5p	MIMAT0000259	TMEM182	130827	HITS-CLIP	27418678	Unspecified
hsa-mir-182-5p	MIMAT0000259	TRIM71	131405	PAR-CLIP	22012620	Unspecified
hsa-mir-182-5p	MIMAT0000259	IL31RA	133396	PAR-CLIP	27292025	Unspecified
hsa-mir-182-5p	MIMAT0000259	S100A16	140576	PAR-CLIP	26701625	Unspecified
hsa-mir-182-5p	MIMAT0000259	PPM1L	151742	HITS-CLIP	23824327	Unspecified
hsa-mir-182-5p	MIMAT0000259	STOML3	161003	PAR-CLIP	23592263	Unspecified
hsa-mir-182-5p	MIMAT0000259	GPR156	165829	PAR-CLIP	23592263	Unspecified
hsa-mir-182-5p	MIMAT0000259	ANO6	196527	CLASH	23622248	Unspecified
hsa-mir-182-5p	MIMAT0000259	GK5	256356	HITS-CLIP	23824327	Unspecified
[truncated: 1,037 more rows]
